# Supplementary material for: Facile preparation of polycyclic halogen-substituted 1,2,3-triazoles by using intramolecular Huisgen cycloaddition
Source: Royal Society of Chemistry journal article supplement (doi:10.1039/d3ob01283b), 2023-01-01

## Supporting Information for:

### Facile preparation of polycyclic halogen-substituted 1,2,3-triazoles by using intramolecular Huisgen cycloaddition

Kazuki Kobayashi, Nozomi Kasakura, Seiya Kikukawa, Shota Matsumoto, Satoru Karasawa, and Takeshi Hata\*

Department of Life Science and Technology, School of Life Science and Technology, Tokyo Institute of Technology, Yokohama, Kanagawa 226-8501, Japan

**General.**  $^1\text{H}$ ,  $^{13}\text{C}$  NMR spectra were taken on an Agilent 400-MR and JEOL JNM-ECZL400S spectrometers at 400 and 100 MHz, respectively.  $^{19}\text{F}$  NMR spectra were taken on a JEOL JNM-ECZL400S spectrometer at 282 MHz.  $\text{CDCl}_3$  was used as the solvent. Chemical shifts are reported in parts per million shift ( $\delta$  value) from  $\text{Me}_4\text{Si}$  ( $\delta$  0 ppm for  $^1\text{H}$ ) or based on the middle peak of the solvent ( $\text{CDCl}_3$ ) ( $\delta$  77.00 ppm for  $^{13}\text{C}$ ), or based on  $\text{C}_6\text{F}_6$  ( $\delta$  -164.9 ppm for  $^{19}\text{F}$ ) as internal standards, respectively. Signal patterns are indicated as br, broad; s, singlet; d, doublet; t, triplet; q, quartet; m, multiplet. Coupling constants ( $J$ ) are given in Hertz. Infrared (IR) spectra were recorded on a JASCO FT/IR-4100 spectrometer and are reported in wave numbers ( $\text{cm}^{-1}$ ). High resolution mass spectra (HRMS) were obtained on Bruker micrOTOF II by positive electrospray ionization (ESI) method calibrated with sodium formate and on a JEOL JMS-700 in electron impact ionization (EI) method calibrated with perfluorokerosene at the Suzukake-dai Material Analysis Center, Technical Department, Tokyo Institute of Technology. The ultraviolet–visible (UV–vis) spectra of the solutions were recorded on JASCO V760 spectrometers. The UV–vis spectra were recorded in the solid state utilizing JASCO V570 spectrometers, which were equipped with a calibrated integrating sphere system. The solid-state absorption spectra were obtained by measuring the diffuse reflectance spectra, followed by a Kubelka–Munk conversion. The fluorescence spectra and quantum yield of the solids were determined on a JASCO FP-8500 spectrofluorimeter that was equipped with a calibrated integrating sphere system. Column chromatography was performed with Silica gel [Wakogel<sup>®</sup> C-200, size 100-200 mesh (75-150  $\mu\text{m}$ ), Cat.No. 233-00078, Wako Pure Chemical Industries, Ltd. (Japan)]. All reagents and solvents were purchased from Kanto Chemicals Co. (Japan), Sigma-Aldrich Co. LLC. (USA), Tokyo Chemical Industry Co., Ltd. (Japan), or Wako Pure Chemical Industries, Ltd. (Japan). Chemicals were purified or dried in a standard manner, if necessary. All reactions were carried out under argon.

**1-(2-Azidoethyl)-2-(2,2-dibromovinyl)benzene (9).** This was prepared according to the following literatures [(a) Xu, X.; Zhong, Y.; Gao, Q. X. Z.; Gou, Z.; Yu, B. *Org. Lett.* **2020**, *22*, 5176-5181; (b) Kunzer, A.; Wendt, M. D. *Tetrahedron Lett.* **2011**, *52*, 1815-1818].

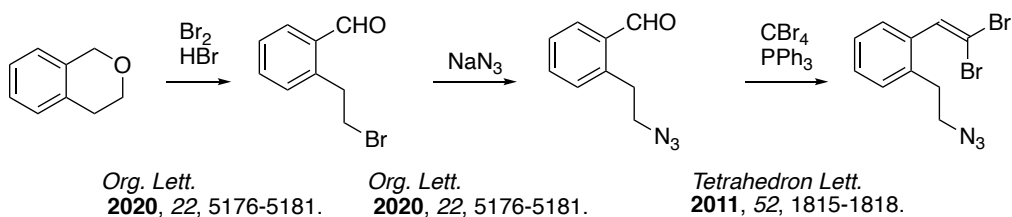

To a stirred solution of commercially available isochroman (2.18 g, 20.0 mmol) in  $\text{CCl}_4$  (10 mL) was added bromine (3.20 g, 20.0 mmol) dropwise at 0 °C under argon and the mixture was heated in an oil bath maintained at 90 °C under argon. After being stirred for 1.5 h at that temperature, the solution was cooled to room temperature and concentrated under reduced pressure to obtain a yellowish oil. Then, hydrobromic acid (7.10 g, 40.0 mmol) was added to the obtained yellowish oil and the mixture was heated in an oil bath maintained at 90 °C for 20 min under argon. After being cooled to room temperature, the reaction was carefully quenched with saturated aqueous  $\text{NaHCO}_3$  solution. The organic layer was separated and the aqueous layer was extracted with  $\text{CH}_2\text{Cl}_2$ . The combined organic layers were washed with brine, dried over  $\text{Na}_2\text{SO}_4$ , and concentrated *in vacuo* to give 2-(2-bromoethyl)benzaldehyde as a crude brownish oil, which was essentially pure by  $^1\text{H}$  NMR analysis and was used in the next step without purification.

The mixture of 2-(2-bromoethyl)benzaldehyde (958 mg, 4.30 mmol) obtained above and sodium azide (2.60 g, 40.0 mmol) in DMF (40 mL) was heated in an oil bath maintained at 80 °C for 10 h under argon. After the mixture was cooled to room temperature, water was added to the mixture and extracted with diethyl ether. The combined organic layer was successively washed with water and brine, dried over  $\text{Na}_2\text{SO}_4$ , and concentrated *in vacuo* to give a crude yellowish oil, which was chromatographed on silica gel (hexane-ethyl acetate) to afford give 2-(2-azidoethyl)benzaldehyde (1.53 g, 44% yield, 2 steps) as a pale yellowish oil.

To a stirred solution of  $\text{CBr}_4$  (5.96 g, 18.0 mmol) in  $\text{CH}_2\text{Cl}_2$  (40 mL) was added  $\text{PPh}_3$  (9.43 g, 36.0 mmol) at 0 °C under argon and the mixture was stirred at room temperature for 10 min under argon. After the mixture was cooled to 0 °C again, 2-(2-azidoethyl)benzaldehyde (1.53 g, 8.74 mmol) obtained above in  $\text{CH}_2\text{Cl}_2$  (5 mL) was added and the mixture was stirred at that temperature overnight. Then, the reaction was terminated with the addition of water. The organic layer was separated and the aqueous layer was extracted with  $\text{CH}_2\text{Cl}_2$ . The combined organic layers were washed successively with aqueous saturated  $\text{Na}_2\text{S}_2\text{O}_4$  solution and brine, dried over  $\text{Na}_2\text{SO}_4$ , and concentrated to give a crude solid. This crude solid was crushed and immersed in hexane, filtered, and concentrated *in vacuo* to a crude oil, which was chromatographed on silica gel (hexane-ethyl acetate) to afford the title compound (1.60 g, 56%) as a pale yellowish oil.

$^1\text{H}$  NMR  $\delta$  2.86 (t,  $J = 7.2$  Hz, 2H), 3.47 (t,  $J = 7.2$  Hz, 2H), 7.24 (dd,  $J = 1.2, 7.2$  Hz, 1H), 7.28 (dt,  $J = 1.2, 7.2$  Hz, 1H), 7.33 (dt,  $J = 2.4, 7.2$  Hz, 1H), 7.45 (dd,  $J = 2.4, 7.2$  Hz, 1H), 7.55 (s, 1H).

$^{13}\text{C}$  NMR  $\delta$  32.90, 51.57, 92.94, 126.92, 128.75, 129.22, 129.58, 135.49, 135.75, 136.16.

IR (neat) 3073, 3018, 2927, 2864, 2100, 1601, 1483, 1447, 1348, 1299, 1261, 885, 859, 830, 804, 752  $\text{cm}^{-1}$ .

HRMS (ESI) Calcd for  $\text{C}_{10}\text{H}_9^{79}\text{Br}_2\text{N}_3\text{Na}$   $[\text{M}+\text{Na}]^+$ : 351.9055. Found: 351.9049.

HRMS (ESI) Calcd for C<sub>10</sub>H<sub>9</sub><sup>79</sup>Br<sup>81</sup>BrN<sub>3</sub>Na [M+Na]<sup>+</sup>: 353.9035. Found: 353.9036.

HRMS (ESI) Calcd for C<sub>10</sub>H<sub>9</sub><sup>81</sup>Br<sub>2</sub>N<sub>3</sub>Na [M+Na]<sup>+</sup>: 355.9015. Found: 355.9014.

**Typical procedure for Halogen-substituted Tricyclic Triazole Derivatives from 1-(ω-Azidoalkyl)-2-(2,2-dihalovinyl)arenes. 1-Bromo-5,6-dihydro-[1,2,3]triazolo[5,1-*a*]isoquinoline (10).**

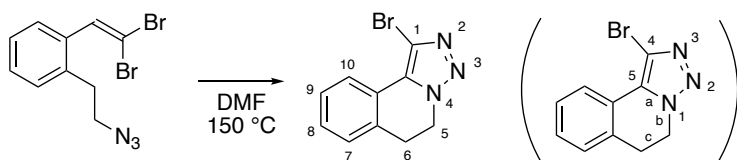

A mixture of 1-(azidomethyl)-2-(2,2-dibromovinyl)benzene (**9**) (1.31 g, 4.00 mmol) in DMF (20 mL) was stirred in an oil bath maintained at 150 °C for 8 h under argon. The reaction was terminated with the addition of water. The organic layer was separated and the aqueous layer was extracted with ethyl acetate. The combined organic layers were washed with brine, dried over Na<sub>2</sub>SO<sub>4</sub>, and concentrated *in vacuo* to give a crude solid, which was chromatographed on silica gel (hexane-ethyl acetate) to afford the title compound (855 mg, 85%) as a white solid.

<sup>1</sup>H NMR δ 3.26 (t, *J* = 7.2 Hz, 2H), 4.60 (t, *J* = 7.2 Hz, 2H), 7.34 (br dd, *J* = 1.6, 7.2 Hz, 1H), 7.38 (dt, *J* = 1.6, 7.2 Hz, 1H), 7.42 (dt, *J* = 1.6, 7.2 Hz, 1H), 8.20 (br dd, *J* = 1.6, 7.2 Hz, 1H).

<sup>13</sup>C NMR δ 28.97, 49.37, 116.45, 123.42, 124.17, 127.75, 128.40, 129.72, 130.30, 132.20.

IR (KBr) 3064, 3022, 2988, 2947, 2906, 1610, 1579, 1553, 1483, 1458, 1431, 1346, 1291, 1280, 1255, 1233, 1188, 1162, 1043, 998, 946, 915, 869, 768, 740, 716, 680 cm<sup>-1</sup>.

HRMS (ESI) Calcd for C<sub>10</sub>H<sub>8</sub><sup>79</sup>BrN<sub>3</sub>Na [M+Na]<sup>+</sup>: 271.9794. Found: 271.9793.

HRMS (ESI) Calcd for C<sub>10</sub>H<sub>8</sub><sup>81</sup>BrN<sub>3</sub>Na [M+Na]<sup>+</sup>: 273.9774. Found: 273.9774.

M.p. 88-89 °C.

The confirmation of the structure of **6** was based on the X-ray crystallographic data of **19**.

**1-Bromo-[1,2,3]triazolo[5,1-*a*]isoquinoline (11).**

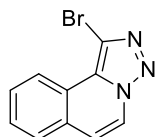

The mixture of 1-bromo-5,6-dihydro-[1,2,3]triazolo[5,1-*a*]isoquinoline (**10**) (12.5 mg, 0.050 mmol) and MnO<sub>2</sub> (217 mg, 2.50 mmol) in xylene (5 mL) was heated in an oil bath maintained at 160 °C under argon. After the mixture was stirred at that temperature for 24 h, the mixture was cooled to room temperature and it was filtered through Celite. The filtrate was concentrated *in vacuo* to give a crude oil, which was chromatographed on silica gel (hexane-ethyl acetate) to afford the title compound (11.6 mg, 93%) as a white solid.

$^1\text{H}$  NMR  $\delta$  7.25 (d,  $J = 7.6$  Hz, 1H), 7.70 (t,  $J = 7.6$  Hz, 1H), 7.75 (t,  $J = 7.6$  Hz, 1H), 7.83 (d,  $J = 7.6$  Hz, 1H), 8.47 (d,  $J = 7.6$  Hz, 1H), 8.91 (d,  $J = 7.6$  Hz, 1H).

$^{13}\text{C}$  NMR  $\delta$  112.93, 117.16, 122.69, 122.76, 123.31, 127.65, 128.49, 129.02, 129.38, 129.53.

IR (KBr) 3073), 3040, 2966, 2922, 2850, 2100, 1731, 1604, 1568, 1483, 1454, 1433, 1346 1276, 1256, 1092, 1043, 1004, 878, 831, 806, 707, 566  $\text{cm}^{-1}$ .

HRMS (ESI) Calcd for  $\text{C}_{10}\text{H}_6^{79}\text{BrN}_3\text{Na}$   $[\text{M}+\text{Na}]^+$ : 269.9637. Found: 269.9637.

HRMS (ESI) Calcd for  $\text{C}_{10}\text{H}_6^{81}\text{BrN}_3\text{Na}$   $[\text{M}+\text{Na}]^+$ : 271.9617. Found: 271.9617.

M.p. 128-129  $^\circ\text{C}$ .

### 1-(2-Azidoethyl)-2-(2,2-dichlorovinyl)benzene (12).

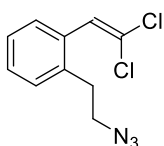

$^1\text{H}$  NMR  $\delta$  2.87 (t,  $J = 7.2$  Hz, 2H), 3.46 (t,  $J = 7.2$  Hz, 2H), 6.97 (s, 1H), 7.24 (dd,  $J = 2.4, 7.2$  Hz, 1H), 7.28 (dt,  $J = 2.4, 7.2$  Hz, 1H), 7.31 (dt,  $J = 2.4, 7.2$  Hz, 1H), 7.45 (dd,  $J = 2.4, 7.2$  Hz, 1H).

$^{13}\text{C}$  NMR  $\delta$  32.96, 51.72, 123.41, 126.97, 127.21, 128.78, 129.47, 129.63, 133.07, 136.22.

IR (neat) 3066, 3024, 2930, 2873, 2099, 1610, 1483, 1450, 1349, 1265, 1102, 1050, 952, 915, 833, 756, 653, 607  $\text{cm}^{-1}$ .

HRMS (ESI) Calcd for  $\text{C}_{10}\text{H}_9^{35}\text{Cl}_2\text{N}_3\text{Na}$   $[\text{M}+\text{Na}]^+$ : 264.0066. Found: 264.0066.

HRMS (ESI) Calcd for  $\text{C}_{10}\text{H}_9^{35}\text{Cl}^{37}\text{ClN}_3\text{Na}$   $[\text{M}+\text{Na}]^+$ : 266.0037. Found: 266.0030.

HRMS (ESI) Calcd for  $\text{C}_{10}\text{H}_9^{37}\text{Cl}_2\text{N}_3\text{Na}$   $[\text{M}+\text{Na}]^+$ : 268.0010. Found: 268.0006.

### 1-(2-Azidoethyl)-2-(2,2-diiodovinyl)benzene (13).

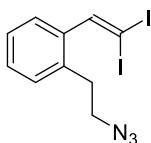

$^1\text{H}$  NMR  $\delta$  2.82 (t,  $J = 7.2$  Hz, 2H), 3.46 (t,  $J = 7.2$  Hz, 2H), 7.23 (br d,  $J = 7.2$  Hz, 1H), 7.26 (dd,  $J = 1.6, 7.2$  Hz, 1H), 7.29 (dt,  $J = 1.6, 7.2$  Hz, 1H), 7.35 (dt,  $J = 1.6, 7.2$  Hz, 1H), 8.17 (s, 1H).

$^{13}\text{C}$  NMR  $\delta$  32.97, 51.54, 127.14, 128.79, 128.99, 129.45, 129.77, 135.10, 140.56, 151.03.

IR (neat) 3062, 3022, 2956, 2926, 2870, 2099, 1599, 1481, 1447, 1348, 1289, 1124, 1073, 878, 852, 823, 788, 753, 706  $\text{cm}^{-1}$ .

HRMS (ESI) Calcd for  $\text{C}_{10}\text{H}_9\text{I}_2\text{N}_3\text{Na}$   $[\text{M}+\text{Na}]^+$ : 447.8778. Found: 447.8774.

**A 52:48 *Z/E* mixture of 1-(2-azidoethyl)-2-(2-bromo-2-fluorovinyl)benzene (14).** This was prepared according to the following literatures [(a) Xu, J.; Burton, D. J. *J. Org. Chem.* **2006**, *71*, 3743-3747; (b) Xu, X.; Zhong, Y.; Gao, Q. X. Z.; Gou, Z.; Yu, B. *Org. Lett.* **2020**, *22*, 5176-5181].

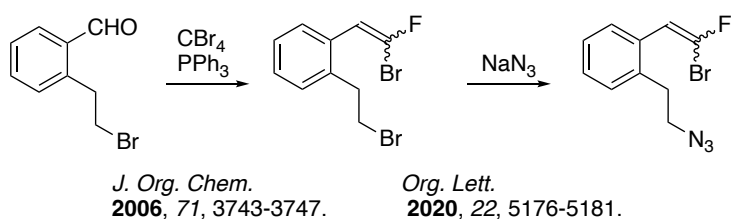

To a stirred solution of  $\text{CFBr}_3$  (0.488 mL, 18.0 mmol) in THF (5 mL) was added  $\text{PPh}_3$  (2.62 g, 10.0 mmol) at room temperature under argon and the mixture was stirred at 70 °C for 15 min. After the mixture was cooled to room temperature again, 2-(2-bromoethyl)benzaldehyde (530 mg, 2.50 mmol) obtained above in THF (2 mL) was added and the mixture was stirred at 70 °C for 6 h. Then, the reaction was terminated with the addition of water. Hexane was added to the mixture and filtered. The organic layer was separated and the aqueous layer was extracted with ethyl acetate. The combined organic layers were washed with brine, dried over  $\text{Na}_2\text{SO}_4$ , and concentrated to give a crude solid. This crude solid was crushed and immersed in hexane, filtered, and concentrated *in vacuo* to a crude oil, which was chromatographed on silica gel (hexane-ethyl acetate) to afford a 54:46 *Z/E* mixture of 1-(2-azidoethyl)-2-(2-bromo-2-fluorovinyl)benzene (332 mg, 43%) as a pale yellowish oil. The mixture of a 52:48 *Z/E* mixture of 1-(2-azidoethyl)-2-(2-bromo-2-fluorovinyl)benzene (332 mg, 1.08 mmol) and sodium azide (140 mg, 2.16 mmol) in DMF (2 mL) was heated in an oil bath maintained at 80 °C for 10 h under argon. After the mixture was cooled to room temperature, water was added to the mixture and extracted with diethyl ether. The combined organic layer was successively washed with water and brine, dried over  $\text{Na}_2\text{SO}_4$ , and concentrated *in vacuo* to give a crude yellowish oil, which was chromatographed on silica gel (hexane-ethyl acetate) to afford give the title compound (131 mg, 45%) as a colorless oil.

**Z isomer:**  $^1\text{H NMR}$   $\delta$  2.87 (t,  $J = 7.2$  Hz, 2H), 3.46 (t,  $J = 7.2$  Hz, 2H), 6.69 (d,  $J = 12.8$  Hz, 1H), 7.18-7.36 (m, 4H).

$^{13}\text{C NMR}$   $\delta$  33.01, 51.60, 109.78 (d,  $J = 21.5$  Hz), 127.05, 128.58, 129.45 (d,  $J = 8.6$  Hz), 129.60, 129.84 (d,  $J = 2.4$  Hz), 135.32 (d,  $J = 0.9$  Hz), 137.32 (d,  $J = 316.7$  Hz).

$^{19}\text{F NMR}$   $\delta$  -69.00.

**E isomer:**  $^1\text{H NMR}$  (characteristic peaks are shown)  $\delta$  2.89 (t,  $J = 7.2$  Hz, 2H), 3.48 (t,  $J = 7.2$  Hz, 2H), 6.15 (d,  $J = 31.2$  Hz, 1H), 7.39 (dd,  $J = 2.0, 7.2$  Hz, 1H), 7.52 (dd,  $J = 2.0, 7.2$  Hz, 1H).

$^{13}\text{C NMR}$   $\delta$  32.91, 51.71, 110.11 (d,  $J = 7.6$  Hz), 127.26, 128.32 (d,  $J = 0.9$  Hz), 129.89, 130.94 (d,  $J = 3.1$  Hz), 131.34 (d,  $J = 7.8$  Hz), 134.37 (d,  $J = 328.2$  Hz), 136.62 (d,  $J = 3.3$  Hz).

$^{19}\text{F NMR}$   $\delta$  -72.09.

IR (ATR) 3070, 3022, 2932, 2870, 2090, 1647, 1487, 1449, 1349, 1262, 1115, 1081, 1040, 828, 753  $\text{cm}^{-1}$  for a 52:48 *Z/E* mixture.

HRMS (ESI) Calcd for  $C_{10}H_9^{79}BrFN_3Na$   $[M+Na]^+$ : 291.9856. Found: 291.9860 for a 52:48 *Z/E* mixture.

HRMS (ESI) Calcd for  $C_{10}H_9^{81}BrFN_3Na$   $[M+Na]^+$ : 293.9836. Found: 293.9840 for a 52:48 *Z/E* mixture.

### 1-(2-Azidoethyl)-4-chloro-2-(2,2-dibromovinyl)benzene (15).

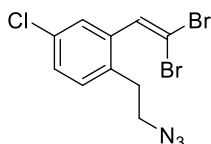

$^1H$  NMR  $\delta$  2.82 (t,  $J = 7.2$  Hz, 2H), 3.46 (t,  $J = 7.2$  Hz, 2H), 7.17 (d,  $J = 8.4$  Hz, 1H), 7.30 (dd,  $J = 2.0, 8.0$  Hz, 1H), 7.37 (d,  $J = 2.0$  Hz, 1H), 7.47 (s, 1H).

$^{13}C$  NMR  $\delta$  32.43, 51.54, 94.29, 128.84, 129.21, 131.04, 132.74, 134.40, 134.94, 137.12.

IR (neat) 3013, 2953, 2926, 2854, 2101, 1597, 1562, 1476, 1348, 1294, 1260, 1119, 1090, 1028, 914, 887, 824, 759  $cm^{-1}$ .

HRMS (ESI) Calcd for  $C_{10}H_8^{79}Br_2^{35}ClN_3Na$   $[M+Na]^+$ : 385.8666. Found: 385.8663.

HRMS (ESI) Calcd for  $C_{10}H_8^{79}Br^{81}Br^{35}ClN_3Na$  (or  $C_{10}H_8^{79}Br_2^{37}ClN_3Na$ )  $[M+Na]^+$ : 387.8644. Found: 387.8643.

HRMS (ESI) Calcd for  $C_{10}H_8^{81}Br_2^{35}ClN_3Na$  (or  $C_{10}H_8^{79}Br^{81}Br^{37}ClN_3Na$ )  $[M+Na]^+$ : 389.8622. Found: 389.8623.

HRMS (ESI) Calcd for  $C_{10}H_8^{81}Br_2^{37}ClN_3Na$   $[M+Na]^+$ : 391.8598. Found: 391.8584.

### Azidomethyl 2-(2,2-dibromovinyl)phenyl sulfide (16).

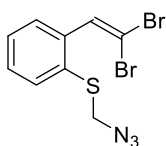

$^1H$  NMR  $\delta$  4.50 (s, 2H), 7.32-7.40 (m, 2H), 7.55-7.61 (m, 2H), 7.68 (s, 1H).

$^{13}C$  NMR  $\delta$  55.69, 92.90, 128.04, 129.32, 129.88, 132.04, 132.21, 135.69, 137.81.

IR (neat) 3059, 3011, 2923, 2852, 2104, 1602, 1584, 1459, 1435, 1299, 1230, 1196, 1063, 1038, 859, 793, 752, 602, 559  $cm^{-1}$ .

HRMS (ESI) Calcd for  $C_9H_7^{79}Br_2N_3SNa$   $[M+Na]^+$ : 369.8620. Found: 369.8629.

HRMS (ESI) Calcd for  $C_9H_7^{79}Br^{81}BrN_3SNa$   $[M+Na]^+$ : 371.8599. Found: 371.8603.

HRMS (ESI) Calcd for  $C_9H_7^{81}Br_2N_3SNa$   $[M+Na]^+$ : 373.8578. Found: 373.8558.

### 1-(Azidomethyl)-2-(2,2-dibromovinyl)benzene (17).

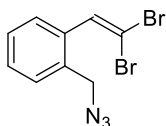

$^1\text{H NMR}$   $\delta$  4.33 (s, 2H), 7.34-7.42 (m, 3H), 7.46 (dd,  $J = 4.4, 8.0$  Hz, 1H), 7.57 (s, 1H).

$^{13}\text{C NMR}$   $\delta$  52.67, 93.52, 128.56, 128.87, 129.31, 129.34, 133.03, 135.22, 135.54.

IR (neat) 3055, 3018, 2933, 2882, 2098, 1602, 1450, 1344, 1255, 1220, 895, 860, 768, 749  $\text{cm}^{-1}$ .

HRMS (ESI) Calcd for  $\text{C}_9\text{H}_7^{79}\text{Br}_2\text{N}_3\text{Na}$   $[\text{M}+\text{Na}]^+$ : 337.8899. Found: 337.8892.

HRMS (ESI) Calcd for  $\text{C}_9\text{H}_7^{79}\text{Br}^{81}\text{BrN}_3\text{Na}$   $[\text{M}+\text{Na}]^+$ : 339.8879. Found: 339.8879.

HRMS (ESI) Calcd for  $\text{C}_9\text{H}_7^{81}\text{Br}_2\text{N}_3\text{Na}$   $[\text{M}+\text{Na}]^+$ : 341.8859. Found: 341.8859.

### 1-(3-Azidopropyl)-2-(2,2-dibromovinyl)benzene (18).

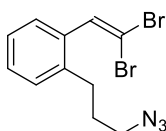

$^1\text{H NMR}$   $\delta$  1.85 (tt,  $J = 6.8, 8.0$  Hz, 2H), 2.66 (t,  $J = 8.0$  Hz, 2H), 3.30 (t,  $J = 6.8$  Hz, 2H), 7.20 (d,  $J = 7.2$  Hz, 1H), 7.24 (t,  $J = 7.2$  Hz, 1H), 7.38 (d,  $J = 7.2$  Hz, 1H), 7.52 (s, 1H).

$^{13}\text{C NMR}$   $\delta$  29.56, 30.43, 50.63, 92.50, 126.38, 128.76, 129.26 (2 peaks), 135.17, 136.47, 138.83.

IR (neat) 3063, 3016, 2931, 2866, 2096, 1601, 1482, 1450, 1346, 1257, 888, 859, 751  $\text{cm}^{-1}$ .

HRMS (ESI) Calcd for  $\text{C}_{11}\text{H}_{11}^{79}\text{Br}_2\text{N}_3\text{Na}$   $[\text{M}+\text{Na}]^+$ : 365.9212. Found: 365.9206.

HRMS (ESI) Calcd for  $\text{C}_{11}\text{H}_{11}^{79}\text{Br}^{81}\text{BrN}_3\text{Na}$   $[\text{M}+\text{Na}]^+$ : 367.9192. Found: 367.9192.

HRMS (ESI) Calcd for  $\text{C}_{11}\text{H}_{11}^{81}\text{Br}_2\text{N}_3\text{Na}$   $[\text{M}+\text{Na}]^+$ : 369.9172. Found: 369.9163.

### 1-(2-Azidoethoxy)-2-(2,2-dibromovinyl)benzene (19).

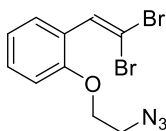

$^1\text{H NMR}$   $\delta$  3.59 (t,  $J = 4.8$  Hz, 2H), 4.14 (t,  $J = 4.8$  Hz), 6.83 (d,  $J = 8.0$  Hz, 1H), 7.00 (t,  $J = 8.0$  Hz, 1H), 7.31 (t,  $J = 8.0$  Hz, 1H), 7.62 (s, 1H), 7.69 (d,  $J = 8.0$  Hz).

$^{13}\text{C NMR}$   $\delta$  50.19, 67.39, 90.26, 111.35, 120.94, 124.74, 129.45, 129.87, 132.67, 155.14.

IR (KBr) 3071, 3016, 2937, 2874, 2103, 1599, 1579, 1486, 1448, 1304, 1254, 1163, 1111, 1052, 1005, 922, 878, 857, 844, 807, 750, 598, 561  $\text{cm}^{-1}$ .

HRMS (EI) Calcd for  $\text{C}_{10}\text{H}_9^{79}\text{Br}_2\text{N}_3\text{O}$   $[\text{M}]^+$ : 344.9112. Found: 344.9113.

HRMS (EI) Calcd for  $\text{C}_{10}\text{H}_9^{79}\text{Br}^{81}\text{BrN}_3\text{O}$   $[\text{M}]^+$ : 346.9092. Found: 346.9093.

HRMS (ESI) Calcd for  $\text{C}_{10}\text{H}_9^{81}\text{Br}_2\text{N}_3\text{O}$   $[\text{M}]^+$ : 348.9071. Found: 348.9067.

M.p. 106-107 °C.

**1-Chloro-5,6-dihydro-[1,2,3]triazolo[5,1-*a*]isoquinoline (20).**

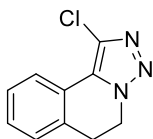

A mixture of 1-(azidomethyl)-2-(2,2-dichlorovinyl)benzene (**12**) (64.8 mg, 0.267 mmol) in DMF (1.0 mL) was stirred in an oil bath maintained at 150 °C for 8 h under argon. The reaction was terminated with the addition of water. The organic layer was separated and the aqueous layer was extracted with ethyl acetate. The combined organic layers were washed with brine, dried over Na<sub>2</sub>SO<sub>4</sub>, and concentrated *in vacuo* to give a crude solid, which was chromatographed on silica gel (hexane-ethyl acetate) to afford the title compound (54.0 mg, 98%) as a white solid.

<sup>1</sup>H NMR δ 3.26 (t, *J* = 7.2 Hz, 2H), 4.59 (t, *J* = 7.2 Hz, 2H), 7.34 (dd, *J* = 2.0, 7.2 Hz, 1H), 7.38 (dt, *J* = 2.0, 7.2 Hz, 1H), 7.42 (dt, *J* = 2.0, 7.2 Hz, 1H), 8.07 (dd, *J* = 2.0, 7.2 Hz, 1H).

<sup>13</sup>C NMR δ 28.95, 45.49, 123.39, 124.33, 127.94, 128.35, 128.42, 129.72, 130.91, 132.03.

IR (KBr) 3068, 3049, 2956, 2920, 2851, 1561, 1487, 1464, 1433, 1306, 1265, 1186, 1095, 1043, 1004, 802, 763, 715 cm<sup>-1</sup>.

HRMS (ESI) Calcd for C<sub>10</sub>H<sub>8</sub><sup>35</sup>ClN<sub>3</sub>Na [M+Na]<sup>+</sup>: 228.0299. Found: 228.0299.

HRMS (ESI) Calcd for C<sub>10</sub>H<sub>8</sub><sup>37</sup>ClN<sub>3</sub>Na [M+Na]<sup>+</sup>: 230.0271. Found: 230.0268.

M.p. 86-87 °C.

The confirmation of the structure of **20** was based on the X-ray crystallographic data of **25**.

**1-Iodo-5,6-dihydro-[1,2,3]triazolo[5,1-*a*]isoquinoline (21).** This is a known compound [Fiandanse, V.; Maurantonio, S.; Punzi, A.; Rafaschieri, G. G. *Org. Biomol. Chem.* **2012**, *10*, 1186].

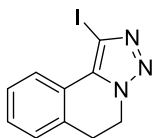

A mixture of 1-(azidomethyl)-2-(2,2-diiodovinyl)benzene (**13**) (57.9 mg, 0.136 mmol) in DMF (1.0 mL) was stirred in an oil bath maintained at 150 °C for 8 h under argon. The reaction was terminated with the addition of water. The organic layer was separated and the aqueous layer was extracted with ethyl acetate. The combined organic layers were washed with brine, dried over Na<sub>2</sub>SO<sub>4</sub>, and concentrated *in vacuo* to give a crude solid, which was chromatographed on silica gel (hexane-ethyl acetate) to afford the title compound (32.4 mg, 80%) as a white solid.

<sup>1</sup>H NMR δ 3.24 (t, *J* = 7.2 Hz, 2H), 4.61 (t, *J* = 7.2 Hz, 2H), 7.34 (dd, *J* = 2.0, 7.2 Hz, 1H), 7.38 (dt, *J* = 2.0, 7.2 Hz, 1H), 7.42 (dt, *J* = 2.0, 7.2 Hz, 1H), 8.35 (dd, *J* = 2.0, 7.2 Hz, 1H).

<sup>13</sup>C NMR δ 29.16, 45.21, 83.56, 123.79, 124.09, 127.61, 128.46, 129.79, 132.49, 133.43.



IR (KBr) 3064, 3008, 2956, 2849, 1481, 1460, 1417, 1348, 1282, 1253, 1221, 1179, 1037, 994, 764  $\text{cm}^{-1}$ .

HRMS (ESI) Calcd for  $\text{C}_{10}\text{H}_8\text{IN}_3\text{Na}$   $[\text{M}+\text{Na}]^+$ : 319.9655. Found: 319.9655.

M.p. 98-99  $^{\circ}\text{C}$ .

These spectral properties were in good agreement with those reported in the above literature.

$^1\text{H}$  NMR  $\delta$  3.21 (t,  $J = 7.0$  Hz, 2H), 4.58 (t,  $J = 7.0$  Hz, 2H), 7.43-7.30 (m, 3H), 8.32 (dd,  $J = 7.8, 1.0$  Hz, 1H).

$^{13}\text{C}$  NMR  $\delta$  29.1, 45.2, 83.5, 123.7, 124.0, 127.6, 128.4, 129.7, 132.5, 133.4.

IR (KBr) 3005, 2979, 2951, 2904, 1476, 1458, 1449, 1424, 1417, 1347, 1281, 1251, 1220, 1178, 1170, 1157, 1036, 994, 778, 758, 738, 713  $\text{cm}^{-1}$ .

MS Calcd for  $\text{C}_{10}\text{H}_8\text{IN}_3$   $[\text{M}]^+$ : 297

M.p. 137-138  $^{\circ}\text{C}$ .

### 1-Fluoro-5,6-dihydro-[1,2,3]triazolo[5,1-*a*]isoquinoline (**22**).

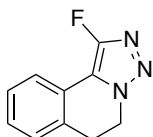

A mixture of a 52:48 *Z/E* mixture of 1-(2-azidoethyl)-2-(2-bromo-2-fluorovinyl)benzene (**14**) (131 mg, 0.480 mmol) in DMF (1.0 mL) was stirred in an oil bath maintained at 150  $^{\circ}\text{C}$  for 14 h under argon. The reaction was terminated with the addition of water. The organic layer was separated and the aqueous layer was extracted with ethyl acetate. The combined organic layers were washed with brine, dried over  $\text{Na}_2\text{SO}_4$ , and concentrated *in vacuo* to give a crude solid, which was chromatographed on silica gel (hexane-ethyl acetate) to afford the title compound (64.5 mg, 71%) as a white solid.

$^1\text{H}$  NMR  $\delta$  3.27 (t,  $J = 7.2$  Hz, 2H), 4.56 (t,  $J = 7.2$  Hz, 2H), 7.32-7.43 (m, 3H), 8.35 (d,  $J = 7.2$  Hz, 1H).

$^{13}\text{C}$  NMR  $\delta$  28.67, 45.77, 116.09 (d,  $J = 29.7$  Hz), 122.85 (d,  $J = 4.4$  Hz), 124.31 (d,  $J = 3.3$  Hz), 128.03, 128.38, 129.30, 131.20 (d,  $J = 1.5$  Hz), 157.21 (d,  $J = 244.4$  Hz).

$^{19}\text{F}$  NMR  $\delta$  -146.66.

IR (ATR) 3073, 3047, 3003, 2921, 2854, 1620, 1605, 1483, 1444, 1390, 1346, 1306, 1269, 1184, 1163, 1122, 1072, 1045, 1019, 981, 950, 914, 759, 723  $\text{cm}^{-1}$ .

HRMS (ESI) Calcd for  $\text{C}_{10}\text{H}_8\text{FN}_3\text{Na}$   $[\text{M}+\text{Na}]^+$ : 212.0594. Found: 212.0593.

M.p. 123-125  $^{\circ}\text{C}$ .

The confirmation of the structure of **22** was based on the X-ray crystallographic data of **25**.

### 1-Bromo-9-chloro-5,6-dihydro-[1,2,3]triazolo[5,1-*a*]isoquinoline (**23**).

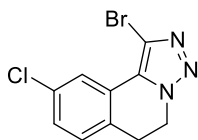

A mixture of 1-(2-azidoethyl)-4-chloro-2-(2,2-dibromovinyl)benzene (**15**) (46.0 mg, 0.126 mmol) in DMF (1.0 mL) was stirred in an oil bath maintained at 150 °C for 8 h under argon. The reaction was terminated with the addition of water. The organic layer was separated and the aqueous layer was extracted with ethyl acetate. The combined organic layers were washed with brine, dried over Na<sub>2</sub>SO<sub>4</sub>, and concentrated *in vacuo* to give a crude solid, which was chromatographed on silica gel (hexane-ethyl acetate) to afford the title compound (32.8 mg, 91%) as a white solid.

<sup>1</sup>H NMR δ 3.23 (t, *J* = 6.8 Hz, 2H), 4.60 (t, *J* = 7.2 Hz, 2H), 7.28 (d, *J* = 8.0 Hz, 1H), 7.36 (dd, *J* = 2.0, 8.0 Hz, 1H), 8.18 (br dd, *J* = 2.0 Hz, 1H).

<sup>13</sup>C NMR δ 28.55, 45.33, 117.07, 124.08, 125.02, 129.37, 129.65, 129.72, 130.48, 133.77.

IR (KBr) 3073, 2956, 2922, 2850, 1604, 1568, 1483, 1433, 1346, 1276, 1256, 1229, 1092, 1043, 1004, 878, 831, 806, 707, 566 cm<sup>-1</sup>.

HRMS (ESI) Calcd for C<sub>10</sub>H<sub>7</sub><sup>79</sup>Br<sub>2</sub><sup>35</sup>ClN<sub>3</sub>Na [M+Na]<sup>+</sup>: 305.9404. Found: 305.9403.

HRMS (ESI) Calcd for C<sub>10</sub>H<sub>7</sub><sup>81</sup>Br<sup>35</sup>ClN<sub>3</sub>Na (or C<sub>10</sub>H<sub>7</sub><sup>79</sup>Br<sup>37</sup>ClN<sub>3</sub>Na) [M+Na]<sup>+</sup>: 307.9382. Found: 307.9381.

HRMS (ESI) Calcd for C<sub>10</sub>H<sub>7</sub><sup>81</sup>Br<sub>2</sub><sup>37</sup>ClN<sub>3</sub>Na [M+Na]<sup>+</sup>: 309.9356. Found: 309.9349.

M.p. 146-147 °C.

The confirmation of the structure of **23** was based on the X-ray crystallographic data of **25**.

### 1-Bromo-5H-benzo[e][1,2,3]triazolo[1,5-c][1,3]thiazine (**24**).

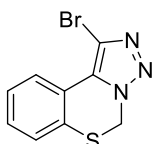

A mixture of azidomethyl 2-(2,2-dibromovinyl)phenyl sulfide (**16**) (67.0 mg, 0.190 mmol) in DMF (1.0 mL) was stirred in an oil bath maintained at 150 °C for 8 h under argon. The reaction was terminated with the addition of water. The organic layer was separated and the aqueous layer was extracted with ethyl acetate. The combined organic layers were washed with brine, dried over Na<sub>2</sub>SO<sub>4</sub>, and concentrated *in vacuo* to give a crude solid, which was chromatographed on silica gel (hexane-ethyl acetate) to afford the title compound (32.5 mg, 63%) as a white solid.

<sup>1</sup>H NMR δ 5.51 (s, 2H), 7.38 (dt, *J* = 2.0, 7.2 Hz, 1H), 7.41 (dt, *J* = 2.0, 7.2 Hz, 1H), 7.50 (dd, *J* = 2.0, 7.2 Hz, 1H), 8.24 (dd, *J* = 2.0, 7.2 Hz, 1H).

<sup>13</sup>C NMR δ 46.29, 118.05, 123.97, 126.13, 127.46, 128.59, 129.53, 129.74, 130.10 (2 peaks).

IR (KBr) 3068, 2995, 2922, 2852, 1668, 1593, 1463, 1447, 1426, 1403, 1287, 1240, 1197, 1078, 990, 942, 754, 726 cm<sup>-1</sup>.

HRMS (ESI) Calcd for C<sub>9</sub>H<sub>6</sub><sup>79</sup>BrN<sub>3</sub>SNa [M+Na]<sup>+</sup>: 271.9794. Found: 271.9793.

HRMS (ESI) Calcd for C<sub>9</sub>H<sub>6</sub><sup>81</sup>BrN<sub>3</sub>SNa [M+Na]<sup>+</sup>: 273.9774. Found: 273.9774.

M.p. 113-114 °C.

The confirmation of the structure of **24** was based on the X-ray crystallographic data of **25**.

**3-Bromo-8H-[1,2,3]triazolo[5,1-a]isoindole (25).** This is a known compound [John, J.; Thomas, J.; Parekh, N.; Dehaen, W. *Eur. J. Org. Chem.* **2015**, 4922-4930].

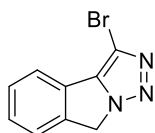

A mixture of 1-(azidomethyl)-2-(2,2-dibromovinyl)benzene (**17**) (72.0 mg, 0.228 mmol) in DMF (1.0 mL) was stirred in an oil bath maintained at 150 °C for 8 h under argon. The reaction was terminated with the addition of water. The organic layer was separated and the aqueous layer was extracted with ethyl acetate. The combined organic layers were washed with brine, dried over Na<sub>2</sub>SO<sub>4</sub>, and concentrated *in vacuo* to give a crude solid, which was chromatographed on silica gel (hexane-ethyl acetate) to afford the title compound (47.3 mg, 88%) as a white solid.

<sup>1</sup>H NMR δ 5.37 (s, 2H), 7.46 (dt, *J* = 1.2, 7.6 Hz, 1H), 7.47 (dd, *J* = 1.2, 7.6 Hz, 1H), 7.52 (t, *J* = 7.6 Hz, 1H), 7.81 (d, *J* = 7.6 Hz, 1H).

<sup>13</sup>C NMR δ 51.81, 110.80, 121.16, 124.11, 126.61, 128.89, 128.97, 140.43, 141.03.

IR (KBr) 3064, 2884, 1568, 1473, 1449, 1411, 1280, 1219, 1156, 1059, 1018, 996, 765, 720, 689 cm<sup>-1</sup>.

HRMS (ESI) Calcd for C<sub>9</sub>H<sub>6</sub><sup>79</sup>BrN<sub>3</sub>Na [M+Na]<sup>+</sup>: 257.9637. Found: 257.9637.

HRMS (ESI) Calcd for C<sub>9</sub>H<sub>6</sub><sup>81</sup>BrN<sub>3</sub>Na [M+Na]<sup>+</sup>: 259.9617. Found: 259.9614.

M.p. 146-147 °C.

As these spectral properties were not in good agreement with those reported in the above literature, the structure of **25** was by determined X-ray.

<sup>1</sup>H NMR δ 5.49 (s, 2H), 7.65-7.66 (m, 3H), 8.37-8.41 (m, 1H).

<sup>13</sup>C NMR δ 52.4, 124.2, 125.1, 125.3, 129.8, 131.6, 140.4, 142.1.

Recrystallization was performed as follows. 3-Bromo-8H-[1,2,3]triazolo[5,1-a]isoindole (**25**) (*ca.* 5 mg) was dissolved in 0.5 mL of ethyl acetate-hexane (2:1) in a test tube. After the test tube was capped with a glass stopper and heated to melt **25**, it was allowed to stand at room temperature for 1 day. After the supernatant was removed by decantation, the remaining solid was collected to give colorless crystals of **25** (*ca.* 2 mg).

The X-ray crystallography of **25** unambiguously determined its whole structure. Its crystallographic data, ORTEP drawing, bond lengths, and bond angles of **25** were attached at the final pages. The structure of other tricyclic triazole derivatives prepared herein were assigned based on the structure of **25**.

### 1-Bromo-6,7-dihydro-5H-benzo[*c*][1,2,3]triazolo[1,5-*a*]azepine (26).

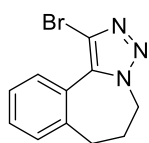

A mixture of 1-(3-azidopropyl)-2-(2,2-dibromovinyl)benzene (**18**) (70.4 mg, 0.200 mmol) in DMF (2.0 mL) was stirred in an oil bath maintained at 150 °C for 40 h under argon. The reaction was terminated with the addition of water. The organic layer was separated and the aqueous layer was extracted with ethyl acetate. The combined organic layers were washed with brine, dried over Na<sub>2</sub>SO<sub>4</sub>, and concentrated *in vacuo* to give a crude solid, which was chromatographed on silica gel (hexane-ethyl acetate) to afford the title compound (40.5 mg, 75%) as a white solid.

<sup>1</sup>H NMR δ 2.45 (quintet, *J* = 7.2 Hz, 2H), 2.68 (t, *J* = 7.2 Hz, 2H), 4.38 (t, *J* = 7.2 Hz, 2H), 7.37 (t, *J* = 5.2 Hz, 1H), 7.42 (d, *J* = 5.2 Hz, 1H), 7.43 (t, *J* = 5.2 Hz, 1H), 7.64 (dd, *J* = 2.8, 5.2 Hz, 1H).

<sup>13</sup>C NMR δ 30.11, 31.02, 47.00, 118.40, 125.79, 127.27, 128.56, 129.93, 130.20, 134.88, 138.71.

IR (KBr) 3065, 2963, 2944, 2864, 1556, 1473, 1436, 1347, 1307, 1289, 1263, 1239, 1186, 1132, 1036, 994, 955, 827, 778, 742, 683 cm<sup>-1</sup>.

HRMS (ESI) Calcd for C<sub>11</sub>H<sub>10</sub><sup>79</sup>BrN<sub>3</sub>Na [M+Na]<sup>+</sup>: 285.9950. Found: 285.9951.

HRMS (ESI) Calcd for C<sub>11</sub>H<sub>10</sub><sup>81</sup>BrN<sub>3</sub>Na [M+Na]<sup>+</sup>: 287.9930. Found: 287.9930.

M.p. 147-148 °C.

The confirmation of the structure of **26** was based on the X-ray crystallographic data of **25**.

### 1-Bromo-5,6-dihydrobenzo[*f*][1,2,3]triazolo[1,5-*d*][1,4]oxazepine (27).

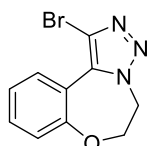

A mixture of 1-(2-azidoethoxy)-2-(2,2-dibromovinyl)benzene (**19**) (85.6 mg, 0.240 mmol) in DMF (2.0 mL) was stirred in an oil bath maintained at 150 °C for 40 h under argon. The reaction was terminated with the addition of water. The organic layer was separated and the aqueous layer was extracted with ethyl acetate. The combined organic layers were washed with brine, dried over Na<sub>2</sub>SO<sub>4</sub>, and concentrated *in vacuo* to give a crude solid, which was chromatographed on silica gel (hexane-ethyl acetate) to afford the title compound (36.1 mg, 54%) as a white solid.

<sup>1</sup>H NMR δ 4.60 (t, *J* = 5.2 Hz, 2H), 4.76 (t, *J* = 5.2 Hz, 2H), 7.18 (d, *J* = 8.0 Hz, 1H), 7.23 (t, *J* = 8.0 Hz, 1H), 7.43 (dt, *J* = 1.6, 8.0 Hz, 1H), 8.02 (dd, *J* = 1.6, 8.0 Hz, 1H).

<sup>13</sup>C NMR δ 50.00, 71.25, 115.75, 118.70, 122.20, 123.53, 129.21, 131.55, 132.28, 154.51.

IR (KBr) 3068, 2953, 2923, 2852, 1609, 1475, 1434, 1293, 1248, 1215, 1114, 1081, 1042, 993, 873, 795, 764 cm<sup>-1</sup>.

HRMS (ESI) Calcd for C<sub>10</sub>H<sub>8</sub><sup>79</sup>BrN<sub>3</sub>ONa [M+Na]<sup>+</sup>: 287.9743. Found: 287.9741.

HRMS (ESI) Calcd for C<sub>10</sub>H<sub>8</sub><sup>81</sup>BrN<sub>3</sub>ONa [M+Na]<sup>+</sup>: 289.9723. Found: 289.9720.

M.p. 106-107 °C.

The confirmation of the structure of **27** was based on the X-ray crystallographic data of **25**.

### 3,4,9,10-Tetrahydro-5H-1,2,10a-triazanaphtho[2,1,8-cde]azulen-5-one (**28**).

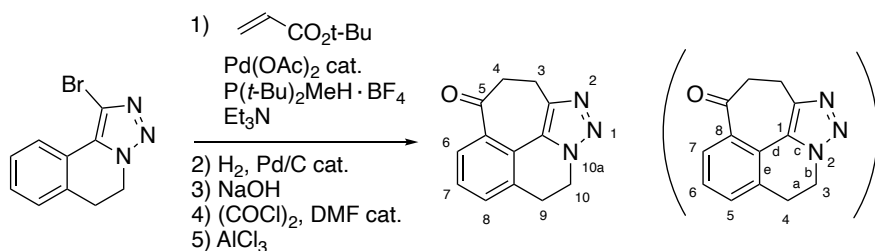

The mixture of 1-bromo-5,6-dihydro-[1,2,3]triazolo[5,1-*a*]isoquinoline (**10**) (1.50 g, 6.00 mmol), *tert*-butyl acrylate (4.40 mL, 30.0 mmol), Pd(OAc)<sub>2</sub> (269 mg, 1.20 mmol), di-*tert*-butyl(methyl)phosphonium tetrafluoroborate (1.56 g, 2.40 mmol), and Et<sub>3</sub>N (1.04 mL, 7.50 mmol) in DMF (30 mL) was stirred in an oil bath maintained at 100 °C for 12 h under argon. After being cooled to room temperature, the reaction mixture was diluted with ethyl acetate and filtered through Celite with aid of ethyl acetate. The organic layer was separated and the aqueous layer was extracted with ethyl acetate. The combined organic layers were washed with brine, dried over Na<sub>2</sub>SO<sub>4</sub>, and concentrated *in vacuo* to give a crude solid, which was chromatographed on silica gel (hexane-ethyl acetate) to afford *tert*-butyl (*E*)-3-(5,6-dihydro-[1,2,3]triazolo[5,1-*a*]isoquinolin-1-yl)acrylate (1.74 g, 77%) as a white solid.

To a suspension of 10% Pd/C (300 mg) in ethyl acetate (10 mL) was added *tert*-butyl (*E*)-3-(5,6-dihydro-[1,2,3]triazolo[5,1-*a*]isoquinolin-1-yl)acrylate (1.74 g, 5.80 mmol) obtained above in ethyl acetate (1 mL). After the reaction mixture was stirred at room temperature under 1 atm of H<sub>2</sub> for 12 h, it was filtered through Celite. The filtrate was concentrated *in vacuo* to give a crude oil of *tert*-butyl 3-(5,6-dihydro-[1,2,3]triazolo[5,1-*a*]isoquinolin-1-yl)propanoate, which was directly used in the next step.

To a stirred solution of *tert*-butyl 3-(5,6-dihydro-[1,2,3]triazolo[5,1-*a*]isoquinolin-1-yl)propanoate obtained above in CH<sub>2</sub>Cl<sub>2</sub> (20 mL) was added CF<sub>3</sub>CO<sub>2</sub>H (4.43 mL, 58.0 mmol) dropwise at room temperature under argon. After stirring at room temperature for 3 h, the reaction was neutralized with aqueous saturated NaHCO<sub>3</sub> solution. The mixture was diluted with ethyl acetate and the organic layer was separated. The aqueous layer was extracted with ethyl acetate. The combined organic layers were washed with brine, dried over Na<sub>2</sub>SO<sub>4</sub>, and concentrated *in vacuo* to give a crude oil, which was chromatographed on silica gel (hexane-ethyl acetate) to afford 3-(5,6-dihydro-[1,2,3]triazolo[5,1-*a*]isoquinolin-1-yl)propanoic acid (546 mg, 38%, 2 steps, not optimized) as a white solid.

3-(5,6-Dihydro-[1,2,3]triazolo[5,1-*a*]isoquinolin-1-yl)propanoic acid:  $^1\text{H NMR } \delta$  3.01 (t,  $J = 7.2$  Hz, 2H), 3.22 (t,  $J = 7.2$  Hz, 2H), 3.32 (t,  $J = 7.2$  Hz, 2H), 4.57 (t,  $J = 7.2$  Hz, 2H), 7.35 (d,  $J = 7.6$  Hz, 1H), 7.38 (br t,  $J = 7.6$  Hz, 1H), 7.40 (br t,  $J = 7.6$  Hz, 1H), 7.63 (d,  $J = 7.6$  Hz, 1H). The peaks of  $\text{CO}_2\text{H}$  was disappeared.

To a stirred solution of 3-(5,6-dihydro-[1,2,3]triazolo[5,1-*a*]isoquinolin-1-yl)propanoic acid (**37**) (60.0 mg, 0.246 mmol) obtained above in  $\text{CH}_2\text{Cl}_2$  (2 mL) were successively added DMF (1 drop) and oxalyl chloride (0.042 mL, 0.492 mmol) at room temperature. After the mixture was stirred for 1.5 h, the solvent and the excess oxalyl chloride were removed *in vacuo* to afford 3-(5,6-dihydro-[1,2,3]triazolo[5,1-*a*]isoquinolin-1-yl)propanoyl chloride as a crude oil, which was pure by  $^1\text{H NMR}$  spectroscopy and directly used in the next step.

To a solution of 3-(5,6-dihydro-[1,2,3]triazolo[5,1-*a*]isoquinolin-1-yl)propanoyl chloride obtained above in  $\text{CH}_2\text{Cl}_2$  (2 mL) was added pulverized  $\text{AlCl}_3$  (328 mg, 2.46 mmol) at  $-78$  °C for 1 h under argon. After the mixture was stirred at room temperature for 12 h, the reaction was terminated by the addition of aqueous saturated  $\text{NH}_4\text{Cl}$  solution. The organic layer was separated and the aqueous layer was extracted with ethyl acetate. The combined organic layers were washed with brine, dried over  $\text{Na}_2\text{SO}_4$ , and concentrated *in vacuo* to give a crude oil which was chromatographed on silica gel (hexane-ethyl acetate) to afford the title compound (50.3 mg, 90%, 2 steps) as a white solid.

$^1\text{H NMR } \delta$  3.10 (dd,  $J = 5.2$  7.6 Hz, 2H), 3.26 (dd,  $J = 5.2$  7.6 Hz, 2H), 3.34 (t,  $J = 7.2$  Hz, 2H), 4.62 (t,  $J = 7.2$  Hz, 2H), 7.37 (t,  $J = 7.6$  Hz, 1H), 7.47 (dd,  $J = 0.8$ , 7.6 Hz, 1H), 7.78 (dd,  $J = 0.8$ , 7.6 Hz, 1H).

$^{13}\text{C NMR } \delta$  21.77, 28.84, 39.96, 44.61, 122.96, 128.41, 128.69, 129.72, 131.46, 132.23, 136.29, 144.26, 201.08.

IR (KBr) 3073, 3040, 2935, 2896, 2847, 1669, 1591, 1439, 1328, 1281, 1091, 971, 807, 769, 480,  $450\text{ cm}^{-1}$ .

HRMS (ESI) Calcd for  $\text{C}_{13}\text{H}_{11}\text{N}_3\text{ONa}$   $[\text{M}+\text{Na}]^+$ : 248.0794. Found: 248.0794.

M.p. 138-139 °C.

Recrystallization was performed as follows. 3,4,9,10-Tetrahydro-5*H*-1,2,10*a*-triazanaphtho[2,1,8-*cde*]azulen-5-one (**28**) (*ca.* 5 mg) was dissolved in 0.5 mL of ethyl acetate-hexane (2:1) in a test tube. After the test tube was capped with a glass stopper and heated to melt **28**, it was allowed to stand at room temperature for 1 day. After the supernatant was removed by decantation, the remaining solid was collected to give colorless crystals of **28** (*ca.* 2 mg).

The X-ray crystallography of **28** unambiguously determined its whole structure. Its crystallographic data, ORTEP drawing, bond lengths, and bond angles of **28** were attached at the final pages. The structure of other tricyclic triazole derivatives prepared herein were assigned based on the structure of **28**.

**4-Methyl-3,4,9,10-tetrahydro-5*H*-1,2,10*a*-triazanaphtho[2,1,8-*cde*]azulen-5-one (**29**).**

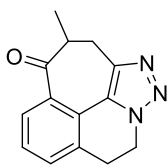

To a stirred solution of 3-(5,6-dihydro-[1,2,3]triazolo[5,1-*a*]isoquinolin-1-yl)-2-methylpropanoic acid (55.0 mg, 0.214 mmol) obtained above in CH<sub>2</sub>Cl<sub>2</sub> (2 mL) were successively added DMF (1 drop) and oxalyl chloride (0.036 mL, 0.428 mmol) at room temperature. After the mixture was stirred for 1.5 h, the solvent and the excess oxalyl chloride were removed *in vacuo* to afford 3-(5,6-dihydro-[1,2,3]triazolo[5,1-*a*]isoquinolin-1-yl)-2-methylpropanoyl chloride as a crude oil, which was pure by <sup>1</sup>H NMR spectroscopy and directly used in the next step.

To a solution of 3-(5,6-dihydro-[1,2,3]triazolo[5,1-*a*]isoquinolin-1-yl)-2-methylpropanoyl chloride obtained above in CH<sub>2</sub>Cl<sub>2</sub> (2 mL) was added pulverized AlCl<sub>3</sub> (266 mg, 2.00 mmol) at -78 °C for 1 h under argon. After the mixture was stirred at room temperature for 12 h, the reaction was terminated by the addition of aqueous saturated NH<sub>4</sub>Cl solution. The organic layer was separated and the aqueous layer was extracted with ethyl acetate. The combined organic layers were washed with brine, dried over Na<sub>2</sub>SO<sub>4</sub>, and concentrated *in vacuo* to give a crude oil which was chromatographed on silica gel (hexane-ethyl acetate) to afford the title compound (47.0 mg, 92%, 2 steps) as a colorless oil.

<sup>1</sup>H NMR δ 1.30 (t, *J* = 6.8 Hz, 3H), 3.02 (dd, *J* = 11.2, 16.8 Hz, 1H), 3.22-3.44 (m, 4H), 4.54 (ddd, *J* = 6.4, 9.2, 12.8 Hz, 1H), 4.69 (td, *J* = 6.4, 12.8 Hz, 1H), 7.36 (t, *J* = 7.6 Hz, 1H), 7.45 (d, *J* = 7.6 Hz, 1H), 7.67 (d, *J* = 7.6 Hz, 1H).

<sup>13</sup>C NMR δ 16.09, 28.71, 29.76, 42.75, 44.60, 122.18, 128.35, 128.80, 129.46, 131.16, 131.74, 136.59, 142.67, 204.30.

IR (neat) 3064, 2974, 2933, 2841, 1683, 1594, 1455, 1357, 1251, 1190, 1170, 1109, 1021, 947, 907, 766 cm<sup>-1</sup>.

HRMS (ESI) Calcd for C<sub>14</sub>H<sub>13</sub>N<sub>3</sub>ONa [M+Na]<sup>+</sup>: 262.0951. Found: 262.0948.

The confirmation of the structure of **29** was based on the X-ray crystallographic data of **28**.

### 3-Methyl-3,4,9,10-tetrahydro-5*H*-1,2,10a-triazanaphtho[2,1,8-*cde*]azulen-5-one (**30**).

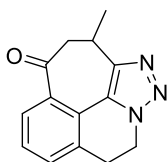

To a stirred solution of 3-(5,6-dihydro-[1,2,3]triazolo[5,1-*a*]isoquinolin-1-yl)butanoic acid (54.2 mg, 0.210 mmol) obtained above in CH<sub>2</sub>Cl<sub>2</sub> (2 mL) were successively added DMF (1 drop) and oxalyl chloride (0.036 mL, 0.420 mmol) at room temperature. After the mixture was stirred for 1.5 h, the

solvent and the excess oxalyl chloride were removed *in vacuo* to afford 3-(5,6-dihydro-[1,2,3]triazolo[5,1-*a*]isoquinolin-1-yl)butanoyl chloride as a crude oil, which was pure by <sup>1</sup>H NMR spectroscopy and directly used in the next step.

To a solution of 3-(5,6-dihydro-[1,2,3]triazolo[5,1-*a*]isoquinolin-1-yl)butanoyl chloride obtained above in CH<sub>2</sub>Cl<sub>2</sub> (2 mL) was added pulverized AlCl<sub>3</sub> (279 mg, 2.10 mmol) at -78 °C for 1 h under argon. After the mixture was stirred at room temperature for 1 h, the reaction was terminated by the addition of aqueous saturated NH<sub>4</sub>Cl solution. The organic layer was separated and the aqueous layer was extracted with ethyl acetate. The combined organic layers were washed with brine, dried over Na<sub>2</sub>SO<sub>4</sub>, and concentrated *in vacuo* to give a crude oil which was chromatographed on silica gel (hexane-ethyl acetate) to afford the title compound (40.2 mg, 80%, 2 steps) as a white solid.

<sup>1</sup>H NMR δ 1.47 (d, *J* = 7.2 Hz, 3H), 3.02 (dd, *J* = 8.4, 12.0 Hz, 1H), 3.12 (dd, *J* = 3.6, 12.0 Hz, 1H), 3.34 (t, *J* = 7.2 Hz, 2H), 3.51 (ddq, *J* = 3.6, 8.4, 7.2 Hz, 1H), 4.62 (m, 2H), 7.37 (t, *J* = 7.6 Hz, 2H), 7.48, (dd, *J* = 1.2, 7.6 Hz, 1H), 7.79 (dd, *J* = 1.2, 7.6 Hz, 2H).

<sup>13</sup>C NMR δ 19.81, 28.16, 28.82, 44.58, 47.60, 123.04, 128.19, 128.60, 128.63, 131.45, 132.19, 136.12, 148.48, 200.33).

IR (KBr) 3072, 2958, 2926, 1658, 1591, 1495, 1446, 1421, 1336, 1305, 1232, 1187, 1074, 1016, 820, 775, 745 cm<sup>-1</sup>.

HRMS (ESI) Calcd for C<sub>14</sub>H<sub>13</sub>N<sub>3</sub>ONa [M+Na]<sup>+</sup>: 262.0951. Found: 262.0947.

M.p. 155-156 °C.

The confirmation of the structure of **30** was based on the X-ray crystallographic data of **28**.

### 11,12-Dihydro-7*H*-1,2,12a-triazacyclopenta[*gh*]pleiaden-7-one (**33**).

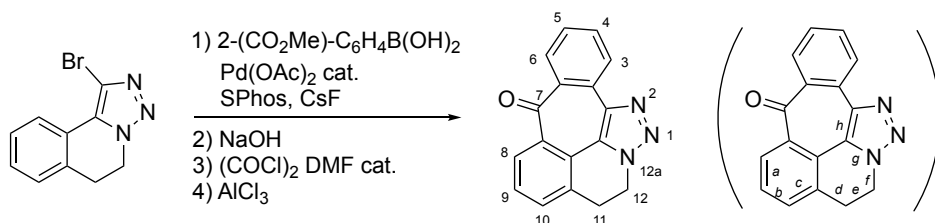

The mixture of 1-bromo-5,6-dihydro-[1,2,3]triazolo[5,1-*a*]isoquinoline (**10**) (250 mg, 1.00 mmol), [2-(methoxycarbonyl)phenyl]boronic acid (414 mg, 3.00 mmol), Pd(OAc)<sub>2</sub> (22.4 mg, 0.100 mmol), SPhos (dicyclohexyl(2',6'-dimethoxy[1,1'-biphenyl]-2-yl)phosphane) (82.0 mg, 0.200 mmol, purchased from Sigma-Aldrich Co. LLC), and CsF (453 mg, 3.00 mmol) in THF (5 mL) was stirred in an oil bath maintained at 80 °C for 10 h under argon. After being cooled to room temperature, the reaction mixture was diluted with ethyl acetate and filtered through Celite with aid of ethyl acetate. The organic layer was separated and the aqueous layer was extracted with ethyl acetate. The combined organic layers were washed with brine, dried over Na<sub>2</sub>SO<sub>4</sub>, and concentrated *in vacuo* to give a crude solid, which was chromatographed on silica gel (hexane-ethyl acetate) to afford methyl 2-(5,6-dihydro-[1,2,3]triazolo[5,1-*a*]isoquinolin-1-yl)benzoate (**31**) (315 mg, 100%) as a white solid.



To a solution of 2-(5,6-dihydro-[1,2,3]triazolo[5,1-*a*]isoquinolin-1-yl)benzoate (**31**) (305 mg, 1.00 mmol) obtained above in MeOH (3 mL)-water (1 mL) was added NaOH (60.0 mg, 1.50 mmol) dropwise at room temperature under argon. After stirring at that temperature for 5 h, the reaction was neutralized with aqueous 1 M HCl solution. The mixture was diluted with ethyl acetate and the organic layer was separated. The aqueous layer was extracted with ethyl acetate. The combined organic layers were washed with brine, dried over Na<sub>2</sub>SO<sub>4</sub>, and concentrated *in vacuo* to give a crude oil, which was chromatographed on silica gel (hexane-ethyl acetate) to afford 2-(5,6-dihydro-[1,2,3]triazolo[5,1-*a*]isoquinolin-1-yl)benzoic acid (**32**) (151 mg, 52%) as a white solid.

To a stirred solution of 2-(5,6-dihydro-[1,2,3]triazolo[5,1-*a*]isoquinolin-1-yl)benzoic acid (**32**) (87.0 mg, 0.300 mmol) obtained above in CH<sub>2</sub>Cl<sub>2</sub> (3 mL) were successively added DMF (1 drop) and oxalyl chloride (0.050 mL, 0.600 mmol) at room temperature. After the mixture was stirred for 1.5 h, the solvent and the excess oxalyl chloride were removed *in vacuo* to afford 2-(5,6-dihydro-[1,2,3]triazolo[5,1-*a*]isoquinolin-1-yl)benzoyl chloride as a crude oil, which was pure by <sup>1</sup>H NMR spectroscopy and directly used in the next step.

To a solution of 2-(5,6-dihydro-[1,2,3]triazolo[5,1-*a*]isoquinolin-1-yl)benzoyl chloride obtained above in CH<sub>2</sub>Cl<sub>2</sub> (3 mL) was added pulverized AlCl<sub>3</sub> (400 mg, 3.00 mmol) at -78 °C for 1 h under argon. After the mixture was stirred at room temperature for 12 h, the reaction was terminated by the addition of aqueous saturated NH<sub>4</sub>Cl solution. The organic layer was separated and the aqueous layer was extracted with ethyl acetate. The combined organic layers were washed with brine, dried over Na<sub>2</sub>SO<sub>4</sub>, and concentrated *in vacuo* to give a crude oil which was chromatographed on silica gel (hexane-ethyl acetate) to afford the title compound (59.2 mg, 73%, 2 steps) as a white solid.

<sup>1</sup>H NMR δ 3.44 (t, *J* = 7.2 Hz, 2H), 4.76 (t, *J* = 7.2 Hz, 2H), 7.58 (t, *J* = 7.6 Hz, 2H) 7.61 (d, *J* = 7.6 Hz, 1H), 7.75 (br t, *J* = 7.6 Hz, 1H), 8.17 (br t, *J* = 7.6 Hz, 2H), 8.66 (br d, *J* = 7.6 Hz, 1H).

<sup>13</sup>C NMR δ 29.05, 44.39, 121.87, 125.59, 128.51, 128.94, 129.33, 129.96, 130.01, 131.23, 131.33, 131.67, 132.65, 136.75, 136.91, 141.77, 192.56.

IR (KBr) 3064, 3003, 2922, 2849, 1620, 1585, 1510, 1372, 1344, 1310, 1280, 1162, 1030, 908, 745, 704 cm<sup>-1</sup>.

HRMS (ESI) Calcd for C<sub>17</sub>H<sub>11</sub>N<sub>3</sub>ONa [M+Na]<sup>+</sup>: 296.0794. Found: 296.0792.

M.p. 175-176 °C.

### 5,6-Dihydroindazolo[2',3':3,4][1,2,3]triazolo[5,1-*a*]isoquinolin-9-ium-10-ide (**35**).

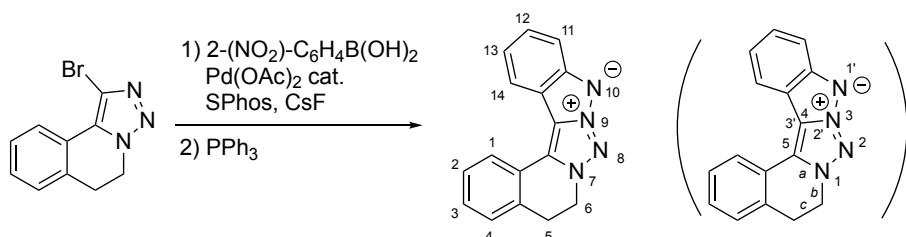

The mixture of 1-bromo-5,6-dihydro-[1,2,3]triazolo[5,1-*a*]isoquinoline (**10**) (175 mg, 0.700 mmol), (2-nitrophenyl)boronic acid (350 mg, 2.10 mmol, purchased from Sigma-Aldrich Co. LLC), Pd(OAc)<sub>2</sub> (15.6 mg, 0.070 mmol), SPhos (dicyclohexyl(2',6'-dimethoxy[1,1'-biphenyl]-2-yl)phosphane) (57.4 mg, 0.140 mmol), and CsF (318 mg, 2.10 mmol) in THF (5 mL) was stirred in an oil bath maintained at 80 °C for 10 h under argon. After being cooled to room temperature, the reaction mixture was diluted with ethyl acetate and filtered through Celite with aid of ethyl acetate. The organic layer was separated and the aqueous layer was extracted with ethyl acetate. The combined organic layers were washed with brine, dried over Na<sub>2</sub>SO<sub>4</sub>, and concentrated *in vacuo* to give a crude solid, which was chromatographed on silica gel (hexane-ethyl acetate) to afford methyl 1-(2-nitrophenyl)-5,6-dihydro-[1,2,3]triazolo[5,1-*a*]isoquinoline (**34**) (174 mg, 85%) as a brownish solid.

The mixture of 1-(2-nitrophenyl)-5,6-dihydro-[1,2,3]triazolo[5,1-*a*]isoquinoline (**34**) (50.0 mg, 0.170 mmol) obtained above and PPh<sub>3</sub> (133 mg, 0.51 mmol) in 1,2-dichlorobenzene (2 mL) was heated in an oil bath maintained at 200 °C for 20 h under argon. After being cooled to room temperature, the reaction mixture was chromatographed on silica gel (hexane-ethyl acetate) to afford the title compound (40.3 mg, 91%) as a yellowish solid.

<sup>1</sup>H NMR δ 3.42 (t, *J* = 7.2 Hz, 2H), 4.74 (t, *J* = 7.2 Hz, 2H), 7.17 (t, *J* = 8.0 Hz, 1H), 7.41 (d, *J* = 8.0 Hz, 1H), 7.44 (t, *J* = 8.0 Hz, 1H), 7.50 (t, *J* = 8.0 Hz, 1H), 7.55 (t, *J* = 8.0 Hz, 1H), 7.76 (d, *J* = 8.0 Hz, 1H), 8.01 (d, *J* = 8.0 Hz, 1H), 8.12 (d, *J* = 8.0 Hz, 1H).

<sup>13</sup>C NMR δ 28.34, 46.36, 109.90, 115.02, 118.02, 119.69, 124.04, 124.42, 124.79, 125.25, 127.04, 128.33, 128.69, 129.67, 131.27, 153.60.

IR (KBr) 3050, 3027, 2998, 2951, 1508, 1488, 1466, 1442, 1383, 1344, 1255, 1194, 1177, 1136, 766, 744 cm<sup>-1</sup>.

HRMS (ESI) Calcd for C<sub>16</sub>H<sub>12</sub>N<sub>4</sub>Na [M+Na]<sup>+</sup>: 283.0954. Found: 283.0950.

M.p. > 200 °C.

Recrystallization was performed as follows. 5,6-Dihydroindazolo[2',3':3,4][1,2,3]triazolo[5,1-*a*]isoquinolin-9-ium-10-ide (**35**) (*ca.* 5 mg) was dissolved in 0.5 mL of ethyl acetate-hexane (2:1) in a test tube. After the test tube was capped with a glass stopper and heated to melt **35**, it was allowed to stand at room temperature for 1 day. After the supernatant was removed by decantation, the remaining solid was collected to give colorless crystals of **35** (*ca.* 2 mg).

The X-ray crystallography of **35** unambiguously determined its whole structure. Its crystallographic data, ORTEP drawing, bond lengths, and bond angles of **35** were attached at the final pages. The structure of other tricyclic triazole derivatives prepared herein were assigned based on the structure of **35**.

**X-ray crystallographic data of 3-bromo-8*H*-[1,2,3]triazolo[5,1-*a*]isoindole (25).** Crystals were obtained by recrystallization of from hexane-ethyl acetate. A single crystal was mounted in a loop.

**Figure S1. ORTEP Drawing of 25.**

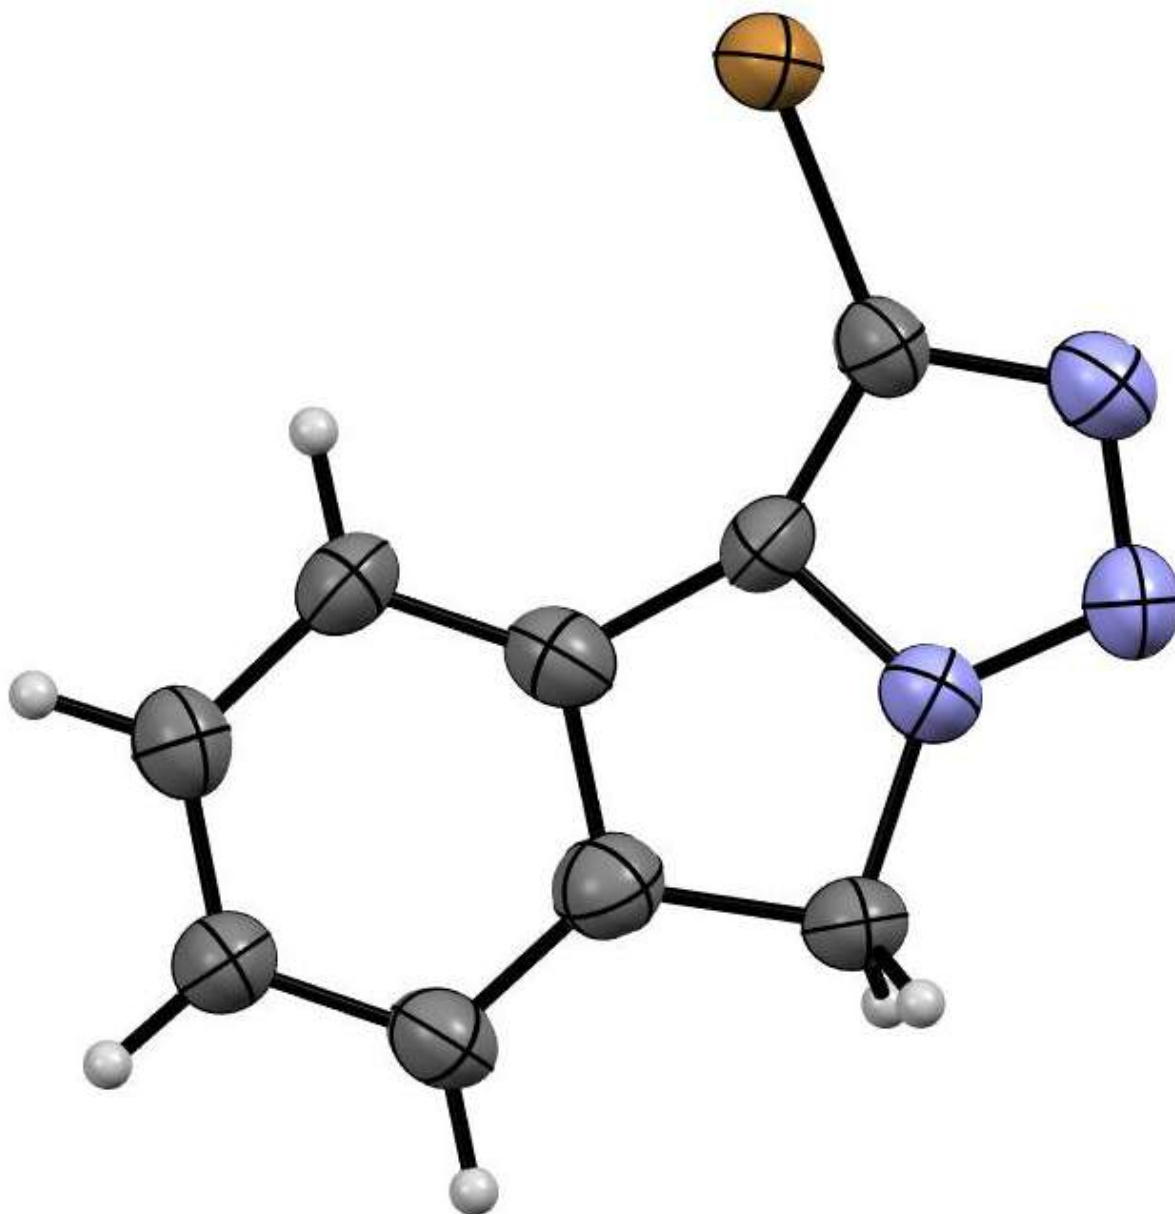

**Table S1. Crystal data and structure refinement for 25.**

|                                             |                                                   |
|---------------------------------------------|---------------------------------------------------|
| Empirical formula                           | C <sub>9</sub> H <sub>6</sub> BrN <sub>3</sub>    |
| Formula weight                              | 236.08                                            |
| Temperature/K                               | 90                                                |
| Crystal system                              | monoclinic                                        |
| Space group                                 | P2 <sub>1</sub> /n                                |
| a/Å                                         | 4.1549(5)                                         |
| b/Å                                         | 25.864(2)                                         |
| c/Å                                         | 8.0655(9)                                         |
| α/°                                         | 90                                                |
| β/°                                         | 101.904(11)                                       |
| γ/°                                         | 90                                                |
| Volume/Å <sup>3</sup>                       | 848.11(16)                                        |
| Z                                           | 4                                                 |
| ρ <sub>calc</sub> /mg/mm <sup>3</sup>       | 1.849                                             |
| μ/mm <sup>-1</sup>                          | 6.194                                             |
| F(000)                                      | 464.0                                             |
| Crystal size/mm <sup>3</sup>                | 0.159 × 0.04 × 0.019                              |
| 2θ range for data collection                | 6.836 to 153.074°                                 |
| Index ranges                                | -4 ≤ h ≤ 4, -31 ≤ k ≤ 32, -10 ≤ l ≤ 10            |
| Reflections collected                       | 15988                                             |
| Independent reflections                     | 1666[R(int) = 0.2096]                             |
| Data/restraints/parameters                  | 1666/0/118                                        |
| Goodness-of-fit on F <sup>2</sup>           | 1.311                                             |
| Final R indexes [I>=2σ (I)]                 | R <sub>1</sub> = 0.1178, wR <sub>2</sub> = 0.2942 |
| Final R indexes [all data]                  | R <sub>1</sub> = 0.1433, wR <sub>2</sub> = 0.3278 |
| Largest diff. peak/hole / e Å <sup>-3</sup> | 3.61/-1.51                                        |

**Table S2. Fractional Atomic Coordinates ( $\times 10^4$ ) and Equivalent Isotropic Displacement Parameters ( $\text{\AA}^2 \times 10^3$ ) for 25.  $U_{\text{eq}}$  is defined as 1/3 of the trace of the orthogonalised  $U_{\text{IJ}}$  tensor of 25.**

| <b>Atom</b> | <b>x</b>  | <b>y</b>   | <b>z</b>    | <b>U(eq)</b> |
|-------------|-----------|------------|-------------|--------------|
| Br01        | 5459 (2)  | 4494.2 (3) | 1586.0 (11) | 48.3 (6)     |
| N002        | 3720 (18) | 3143 (3)   | 3577 (9)    | 46.0 (17)    |
| N003        | 5727 (17) | 3396 (3)   | 1470 (9)    | 52 (2)       |
| N4          | 5052 (19) | 2976 (3)   | 2279 (10)   | 51.4 (19)    |
| C005        | 1530 (20) | 3336 (3)   | 5893 (12)   | 48 (2)       |
| C006        | 3490 (19) | 3664 (3)   | 3644 (12)   | 41.6 (18)    |
| C007        | 4810 (20) | 3819 (3)   | 2283 (10)   | 42.4 (19)    |
| C008        | 1360 (20) | 4275 (3)   | 5722 (12)   | 46 (2)       |
| C009        | 30 (20)   | 4272 (4)   | 7185 (13)   | 48 (2)       |
| C00A        | 2090 (20) | 3804 (3)   | 5079 (11)   | 45 (2)       |
| C00B        | -500 (20) | 3827 (4)   | 7989 (13)   | 48 (2)       |
| C00C        | 260 (20)  | 3344 (4)   | 7343 (12)   | 49 (2)       |
| C00D        | 2540 (20) | 2872 (3)   | 4942 (11)   | 47 (2)       |

**Table S3. Anisotropic Displacement Parameters ( $\text{\AA}^2 \times 10^3$ ) for 25. The Anisotropic displacement factor exponent takes the form:  $-2\pi^2[h^2a^{*2}U_{11}+2hka^*b^*U_{12}+\dots]$ .**

| Atom | $U_{11}$ | $U_{22}$ | $U_{33}$ | $U_{23}$ | $U_{13}$ | $U_{12}$ |
|------|----------|----------|----------|----------|----------|----------|
| Br01 | 62.3 (9) | 41.7 (8) | 44.5 (9) | 3.7 (3)  | 19.0 (6) | -2.5 (3) |
| N002 | 59 (4)   | 41 (4)   | 41 (4)   | 2 (3)    | 17 (3)   | 2 (3)    |
| N003 | 64 (5)   | 53 (5)   | 43 (5)   | 1 (3)    | 19 (4)   | -1 (3)   |
| N4   | 65 (4)   | 45 (4)   | 49 (5)   | -6 (4)   | 22 (4)   | 2 (3)    |
| C005 | 53 (4)   | 42 (5)   | 50 (6)   | 0 (4)    | 11 (4)   | -4 (4)   |
| C006 | 49 (4)   | 27 (4)   | 51 (5)   | 1 (4)    | 15 (4)   | 3 (3)    |
| C007 | 55 (4)   | 41 (5)   | 34 (4)   | -3 (3)   | 15 (4)   | -1 (3)   |
| C008 | 55 (4)   | 31 (5)   | 52 (6)   | 2 (4)    | 12 (4)   | 5 (4)    |
| C009 | 56 (5)   | 48 (6)   | 43 (5)   | -5 (4)   | 14 (4)   | 1 (4)    |
| C00A | 47 (4)   | 51 (5)   | 39 (5)   | 2 (4)    | 13 (4)   | -4 (4)   |
| C00B | 61 (5)   | 38 (5)   | 49 (5)   | 2 (4)    | 19 (4)   | 2 (4)    |
| C00C | 54 (5)   | 52 (6)   | 43 (5)   | 3 (4)    | 19 (4)   | -3 (4)   |
| C00D | 63 (5)   | 36 (5)   | 47 (5)   | 5 (4)    | 20 (4)   | -1 (4)   |

**Table S4. Bond Lengths for 25.**

| <b>Atom</b> | <b>Atom</b> | <b>Length/Å</b> | <b>Atom</b> | <b>Atom</b> | <b>Length/Å</b> |
|-------------|-------------|-----------------|-------------|-------------|-----------------|
| Br01        | C007        | 1.872 (9)       | C005        | C00D        | 1.529 (12)      |
| N002        | N4          | 1.353 (10)      | C006        | C007        | 1.383 (12)      |
| N002        | C006        | 1.352 (10)      | C006        | C00A        | 1.445 (13)      |
| N002        | C00D        | 1.472 (10)      | C008        | C009        | 1.402 (14)      |
| N003        | N4          | 1.329 (11)      | C008        | C00A        | 1.383 (12)      |
| N003        | C007        | 1.368 (11)      | C009        | C00B        | 1.361 (13)      |
| C005        | C00A        | 1.420 (12)      | C00B        | C00C        | 1.413 (13)      |
| C005        | C00C        | 1.380 (15)      |             |             |                 |

**Table S5. Bond Angles for 25.**

| <b>Atom</b> | <b>Atom</b> | <b>Atom</b> | <b>Angle/°</b> | <b>Atom</b> | <b>Atom</b> | <b>Atom</b> | <b>Angle/°</b> |
|-------------|-------------|-------------|----------------|-------------|-------------|-------------|----------------|
| N4          | N002        | C00D        | 132.7 (7)      | N003        | C007        | Br01        | 121.9 (6)      |
| C006        | N002        | N4          | 113.2 (7)      | N003        | C007        | C006        | 110.2 (8)      |
| C006        | N002        | C00D        | 114.1 (7)      | C006        | C007        | Br01        | 127.8 (6)      |
| N4          | N003        | C007        | 108.1 (7)      | C00A        | C008        | C009        | 117.7 (8)      |
| N003        | N4          | N002        | 106.2 (7)      | C00B        | C009        | C008        | 122.5 (9)      |
| C00A        | C005        | C00D        | 110.5 (8)      | C005        | C00A        | C006        | 106.7 (8)      |
| C00C        | C005        | C00A        | 120.4 (8)      | C008        | C00A        | C005        | 120.6 (9)      |
| C00C        | C005        | C00D        | 129.1 (8)      | C008        | C00A        | C006        | 132.6 (9)      |
| N002        | C006        | C007        | 102.3 (7)      | C009        | C00B        | C00C        | 120.1 (9)      |
| N002        | C006        | C00A        | 109.0 (8)      | C005        | C00C        | C00B        | 118.7 (8)      |
| C007        | C006        | C00A        | 148.7 (8)      | N002        | C00D        | C005        | 99.7 (6)       |



**Table S6. Torsion Angles for 25.**

| <b>A</b> | <b>B</b> | <b>C</b> | <b>D</b> | <b>Angle/°</b> | <b>A</b> | <b>B</b> | <b>C</b> | <b>D</b> | <b>Angle/°</b> |
|----------|----------|----------|----------|----------------|----------|----------|----------|----------|----------------|
| N002     | C006     | C007     | Br01     | -177.9 (6)     | C009     | C008     | C00A     | C006     | -179.0 (9)     |
| N002     | C006     | C007     | N003     | 0.5 (9)        | C009     | C00B     | C00C     | C005     | -0.2 (14)      |
| N002     | C006     | C00A     | C005     | 0.9 (9)        | C00A     | C005     | C00C     | C00B     | 0.6 (14)       |
| N002     | C006     | C00A     | C008     | 179.4 (9)      | C00A     | C005     | C00D     | N002     | 0.9 (9)        |
| N4       | N002     | C006     | C007     | -0.4 (9)       | C00A     | C006     | C007     | Br01     | 0.0 (19)       |
| N4       | N002     | C006     | C00A     | -179.2 (7)     | C00A     | C006     | C007     | N003     | 178.4 (12)     |
| N4       | N002     | C00D     | C005     | 178.3 (8)      | C00A     | C008     | C009     | C00B     | 1.1 (15)       |
| N4       | N003     | C007     | Br01     | 178.1 (5)      | C00C     | C005     | C00A     | C006     | 178.6 (8)      |
| N4       | N003     | C007     | C006     | -0.4 (10)      | C00C     | C005     | C00A     | C008     | -0.1 (14)      |
| C006     | N002     | N4       | N003     | 0.2 (9)        | C00C     | C005     | C00D     | N002     | -178.8 (9)     |
| C006     | N002     | C00D     | C005     | -0.3 (9)       | C00D     | N002     | N4       | N003     | -178.5 (8)     |
| C007     | N003     | N4       | N002     | 0.2 (9)        | C00D     | N002     | C006     | C007     | 178.5 (7)      |
| C007     | C006     | C00A     | C005     | -              | C00D     | N002     | C006     | C00A     | -0.3 (9)       |
|          |          |          |          | 176.9 (13)     |          |          |          |          |                |
| C007     | C006     | C00A     | C008     | 2 (2)          | C00D     | C005     | C00A     | C006     | -1.2 (10)      |
| C008     | C009     | C00B     | C00C     | -0.7 (15)      | C00D     | C005     | C00A     | C008     | -179.8 (7)     |
| C009     | C008     | C00A     | C005     | -0.7 (14)      | C00D     | C005     | C00C     | C00B     | -179.8 (8)     |

**Table S7. Hydrogen Atom Coordinates ( $\text{\AA}\times 10^4$ ) and Isotropic Displacement Parameters ( $\text{\AA}^2\times 10^3$ ) for 25.**

| <b>Atom</b> | <b>x</b> | <b>y</b> | <b>z</b> | <b>U(eq)</b> |
|-------------|----------|----------|----------|--------------|
| H008        | 1744.87  | 4590.54  | 5191.4   | 55           |
| H009        | -522.44  | 4592.15  | 7631.92  | 58           |
| H00B        | -1386.68 | 3840.66  | 8984.43  | 58           |
| H00C        | -100.74  | 3031.62  | 7897.54  | 58           |
| H00A        | 4305     | 2667.29  | 5661.54  | 57           |
| H00D        | 644.21   | 2644.07  | 4490.96  | 57           |

X-ray crystallographic data of 3,4,9,10-tetrahydro-5*H*-1,2,10a-triazanaphtho[2,1,8-*cde*]azulen-5-one (28).

Figure S2. ORTEP Drawing of 28.

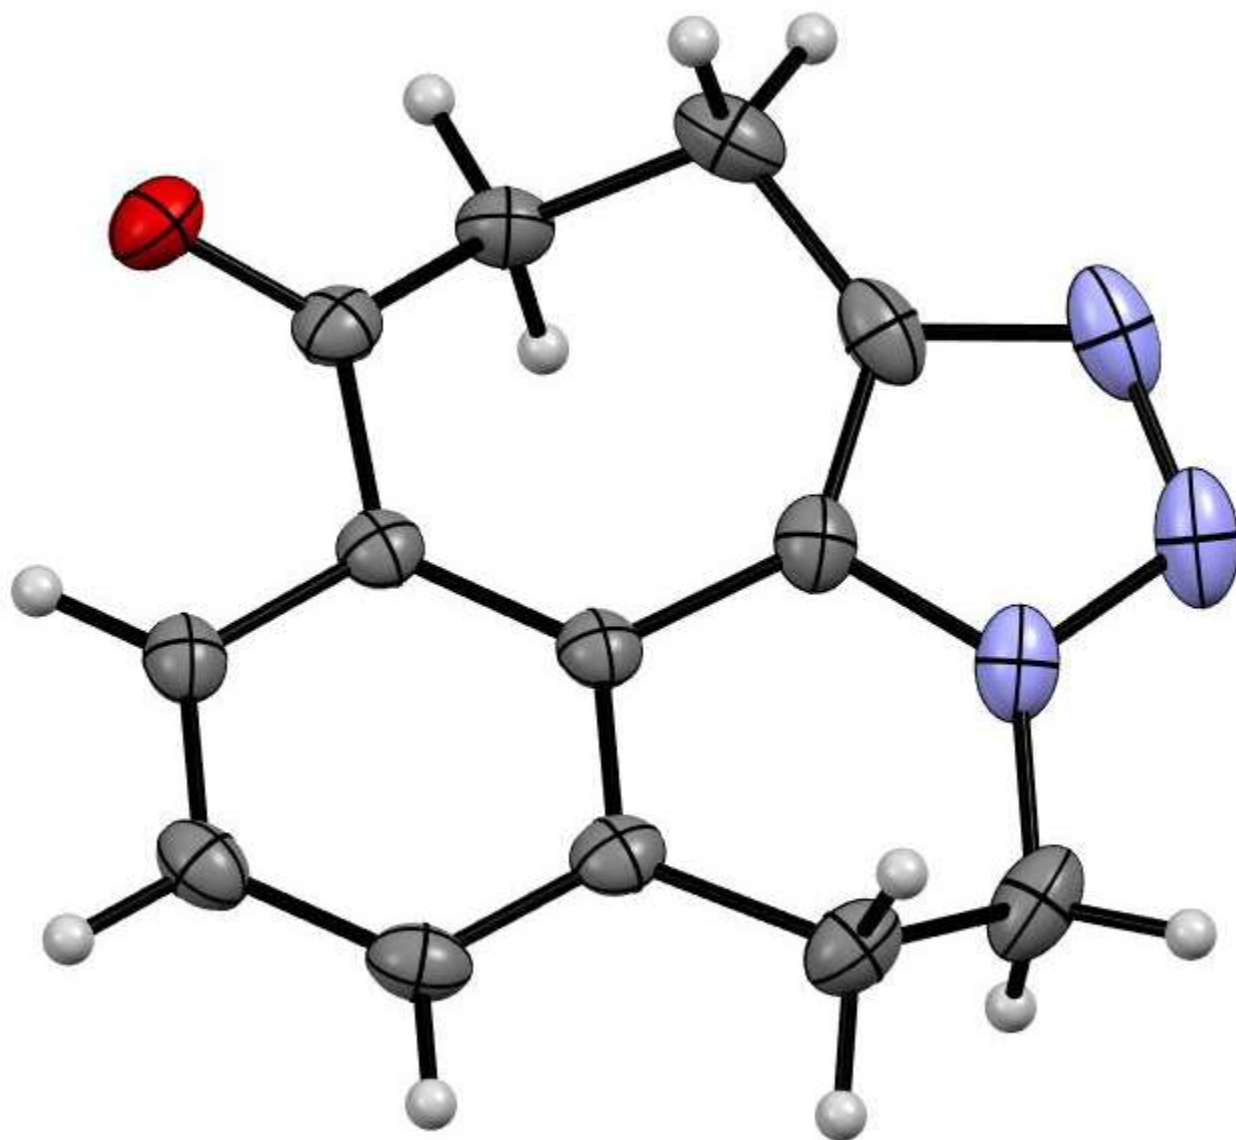

**Table S8. Crystal data and structure refinement for 28.**

|                                             |                                                   |
|---------------------------------------------|---------------------------------------------------|
| Empirical formula                           | C <sub>13</sub> H <sub>11</sub> N <sub>3</sub> O  |
| Formula weight                              | 225.25                                            |
| Temperature/K                               | 90                                                |
| Crystal system                              | monoclinic                                        |
| Space group                                 | P2 <sub>1</sub> /n                                |
| a/Å                                         | 9.0182(5)                                         |
| b/Å                                         | 13.7411(4)                                        |
| c/Å                                         | 9.4416(5)                                         |
| α/°                                         | 90                                                |
| β/°                                         | 118.495(7)                                        |
| γ/°                                         | 90                                                |
| Volume/Å <sup>3</sup>                       | 1028.27(10)                                       |
| Z                                           | 4                                                 |
| ρ <sub>calc</sub> /mg/mm <sup>3</sup>       | 1.455                                             |
| μ/mm <sup>-1</sup>                          | 0.778                                             |
| F(000)                                      | 472.0                                             |
| Crystal size/mm <sup>3</sup>                | 0.136 × 0.029 × 0.015                             |
| 2θ range for data collection                | 11.17 to 148.796°                                 |
| Index ranges                                | -11 ≤ h ≤ 11, -17 ≤ k ≤ 16, -11 ≤ l ≤ 11          |
| Reflections collected                       | 4567                                              |
| Independent reflections                     | 1928[R(int) = 0.0200]                             |
| Data/restraints/parameters                  | 1928/0/154                                        |
| Goodness-of-fit on F <sup>2</sup>           | 1.061                                             |
| Final R indexes [I>=2σ (I)]                 | R <sub>1</sub> = 0.0399, wR <sub>2</sub> = 0.1123 |
| Final R indexes [all data]                  | R <sub>1</sub> = 0.0456, wR <sub>2</sub> = 0.1162 |
| Largest diff. peak/hole / e Å <sup>-3</sup> | 0.27/-0.21                                        |

**Table S9. Fractional Atomic Coordinates ( $\times 10^4$ ) and Equivalent Isotropic Displacement Parameters ( $\text{\AA}^2 \times 10^3$ ) for 28.  $U_{eq}$  is defined as 1/3 of the trace of the orthogonalised  $U_{IJ}$  tensor of 28.**

| Atom | x           | y           | z           | U(eq)    |
|------|-------------|-------------|-------------|----------|
| O17  | 7755.6 (13) | 6474.4 (7)  | 4380.5 (13) | 31.7 (3) |
| N1   | 692.7 (16)  | 6143.5 (8)  | 1284.6 (16) | 30.7 (3) |
| N13  | -49.3 (18)  | 6105.1 (9)  | -323.6 (16) | 38.3 (4) |
| N12  | 1180.8 (19) | 6121.6 (9)  | -717.3 (15) | 38.5 (4) |
| C5   | 3450.5 (17) | 6218.1 (9)  | 3701.9 (17) | 22.6 (3) |
| C14  | 6102.0 (18) | 6355.2 (9)  | 6166.8 (17) | 25.2 (3) |
| C6   | 5205.0 (17) | 6397.2 (9)  | 4484.3 (17) | 22.7 (3) |
| C4   | 2642.0 (18) | 5991.8 (9)  | 4622.0 (18) | 25.1 (3) |
| C11  | 2402.9 (18) | 6193.2 (9)  | 1954.2 (18) | 25.1 (3) |
| C16  | 3568.6 (19) | 5981.1 (10) | 6293.0 (18) | 28.0 (3) |
| C7   | 6232.4 (17) | 6613.5 (9)  | 3646.6 (17) | 25.0 (3) |
| C15  | 5294.7 (19) | 6160.9 (10) | 7067.3 (17) | 28.0 (3) |
| C10  | 2691 (2)    | 6180.0 (10) | 644.6 (17)  | 29.7 (3) |
| C3   | 813.0 (18)  | 5678.6 (10) | 3788.4 (19) | 30.2 (3) |
| C8   | 5464.3 (18) | 7019.5 (10) | 1958.4 (17) | 27.5 (3) |
| C9   | 4325 (2)    | 6298.6 (11) | 646.6 (18)  | 32.8 (4) |
| C2   | -234.4 (19) | 6185.2 (11) | 2189 (2)    | 34.6 (4) |

**Table S10. Anisotropic Displacement Parameters ( $\text{\AA}^2 \times 10^3$ ) for 28. The Anisotropic displacement factor exponent takes the form:  $-2\pi^2[h^2a^2U_{11}+2hka^*b^*U_{12}+\dots]$ .**

| Atom | $U_{11}$ | $U_{22}$ | $U_{33}$ | $U_{23}$ | $U_{13}$ | $U_{12}$ |
|------|----------|----------|----------|----------|----------|----------|
| O17  | 25.9(6)  | 31.0(5)  | 38.9(6)  | 1.1(4)   | 16.1(5)  | 3.5(4)   |
| N1   | 27.8(7)  | 22.7(6)  | 31.4(7)  | 5.0(5)   | 5.8(6)   | -3.0(5)  |
| N13  | 37.2(8)  | 27.8(6)  | 31.2(7)  | 6.6(5)   | 1.2(6)   | -8.2(5)  |
| N12  | 50.3(9)  | 25.1(6)  | 25.8(7)  | 2.2(5)   | 6.6(6)   | -9.8(6)  |
| C5   | 25.5(7)  | 16.6(6)  | 25.3(7)  | -1.2(5)  | 11.9(6)  | 1.8(5)   |
| C14  | 25.8(7)  | 19.6(6)  | 26.4(8)  | -1.3(5)  | 9.5(6)   | 1.1(5)   |
| C6   | 25.2(7)  | 17.2(6)  | 26.0(7)  | 0.0(5)   | 12.5(6)  | 2.4(5)   |
| C4   | 27.6(8)  | 17.2(6)  | 32.8(7)  | -0.5(5)  | 16.4(7)  | 2.6(5)   |
| C11  | 25.1(7)  | 17.6(6)  | 27.8(7)  | 0.8(5)   | 8.7(6)   | -1.0(5)  |
| C16  | 37.7(8)  | 22.0(6)  | 31.4(8)  | -0.5(5)  | 22.2(7)  | 1.3(5)   |
| C7   | 25.6(7)  | 19.2(6)  | 31.2(8)  | -2.4(5)  | 14.3(7)  | 1.7(5)   |
| C15  | 36.9(9)  | 22.3(6)  | 23.6(7)  | -0.8(5)  | 13.4(7)  | 2.2(5)   |
| C10  | 40.1(9)  | 19.4(6)  | 22.9(7)  | -1.1(5)  | 9.5(7)   | -3.4(6)  |
| C3   | 27.6(8)  | 24.0(7)  | 41.5(9)  | 2.7(6)   | 18.5(7)  | 0.1(6)   |
| C8   | 31.5(8)  | 26.1(7)  | 29.8(7)  | 0.5(5)   | 18.5(7)  | 0.7(5)   |
| C9   | 48.2(10) | 27.1(7)  | 28.3(8)  | -2.2(5)  | 22.4(8)  | 1.1(6)   |
| C2   | 22.5(8)  | 24.7(7)  | 51.1(10) | 5.4(6)   | 13.0(7)  | 0.6(6)   |

**Table S11. Bond Lengths for 28.**

| Atom | Atom | Length/Å    | Atom | Atom | Length/Å    |
|------|------|-------------|------|------|-------------|
| O17  | C7   | 1.2229 (16) | C14  | C15  | 1.384 (2)   |
| N1   | N13  | 1.3366 (19) | C6   | C7   | 1.5071 (19) |
| N1   | C11  | 1.3610 (19) | C4   | C16  | 1.389 (2)   |
| N1   | C2   | 1.453 (2)   | C4   | C3   | 1.512 (2)   |
| N13  | N12  | 1.328 (2)   | C11  | C10  | 1.379 (2)   |
| N12  | C10  | 1.358 (2)   | C16  | C15  | 1.390 (2)   |
| C5   | C6   | 1.4123 (19) | C7   | C8   | 1.509 (2)   |
| C5   | C4   | 1.4097 (19) | C10  | C9   | 1.482 (2)   |
| C5   | C11  | 1.459 (2)   | C3   | C2   | 1.515 (2)   |
| C14  | C6   | 1.398 (2)   | C8   | C9   | 1.535 (2)   |

**Table S12. Bond Angles for 28.**

| Atom | Atom | Atom | Angle/°     | Atom | Atom | Atom | Angle/°     |
|------|------|------|-------------|------|------|------|-------------|
| N13  | N1   | C11  | 111.83 (13) | N1   | C11  | C5   | 120.35 (13) |
| N13  | N1   | C2   | 123.53 (13) | N1   | C11  | C10  | 103.83 (13) |
| C11  | N1   | C2   | 124.55 (13) | C10  | C11  | C5   | 135.79 (14) |
| N12  | N13  | N1   | 106.56 (12) | C4   | C16  | C15  | 120.75 (13) |
| N13  | N12  | C10  | 109.28 (13) | O17  | C7   | C6   | 118.52 (13) |
| C6   | C5   | C11  | 123.71 (13) | O17  | C7   | C8   | 118.79 (12) |
| C4   | C5   | C6   | 119.73 (13) | C6   | C7   | C8   | 122.67 (12) |
| C4   | C5   | C11  | 116.46 (13) | C14  | C15  | C16  | 119.77 (13) |
| C15  | C14  | C6   | 121.14 (13) | N12  | C10  | C11  | 108.49 (14) |
| C5   | C6   | C7   | 125.15 (13) | N12  | C10  | C9   | 123.72 (14) |
| C14  | C6   | C5   | 118.92 (13) | C11  | C10  | C9   | 127.57 (14) |
| C14  | C6   | C7   | 115.91 (12) | C4   | C3   | C2   | 113.23 (12) |
| C5   | C4   | C3   | 119.90 (13) | C7   | C8   | C9   | 114.00 (11) |
| C16  | C4   | C5   | 119.64 (13) | C10  | C9   | C8   | 110.74 (12) |
| C16  | C4   | C3   | 120.26 (13) | N1   | C2   | C3   | 107.91 (12) |



**Table S13. Torsion Angles for 28.**

| <b>Atom</b> | <b>x</b> | <b>y</b> | <b>z</b> | <b>U(eq)</b> |
|-------------|----------|----------|----------|--------------|
| H14         | 7286.31  | 6461.85  | 6700.97  | 30           |
| H16         | 3016.52  | 5849.34  | 6913.68  | 34           |
| H15         | 5917.71  | 6150.49  | 8210.65  | 34           |
| H3A         | 319.56   | 5815.87  | 4505.85  | 36           |
| H3B         | 756.66   | 4966.95  | 3605.9   | 36           |
| H8A         | 6384.56  | 7227.66  | 1736.67  | 33           |
| H8B         | 4794.17  | 7603.97  | 1896.96  | 33           |
| H9A         | 4122.01  | 6538.47  | -419.97  | 39           |
| H9B         | 4898.16  | 5659.96  | 840.18   | 39           |
| H2A         | -1339.07 | 5856.53  | 1581.83  | 42           |
| H2B         | -437.11  | 6870.88  | 2369.52  | 42           |

**X-ray crystallographic data of 5,6-dihydroindazolo[2',3':3,4][1,2,3]triazolo[5,1-*a*]isoquinolin-9-ium-10-ide (35).**

Crystals were obtained by recrystallization of from hexane-ethyl acetate. A single crystal was mounted in a loop.

**Figure S3. ORTEP Drawing of 35.**

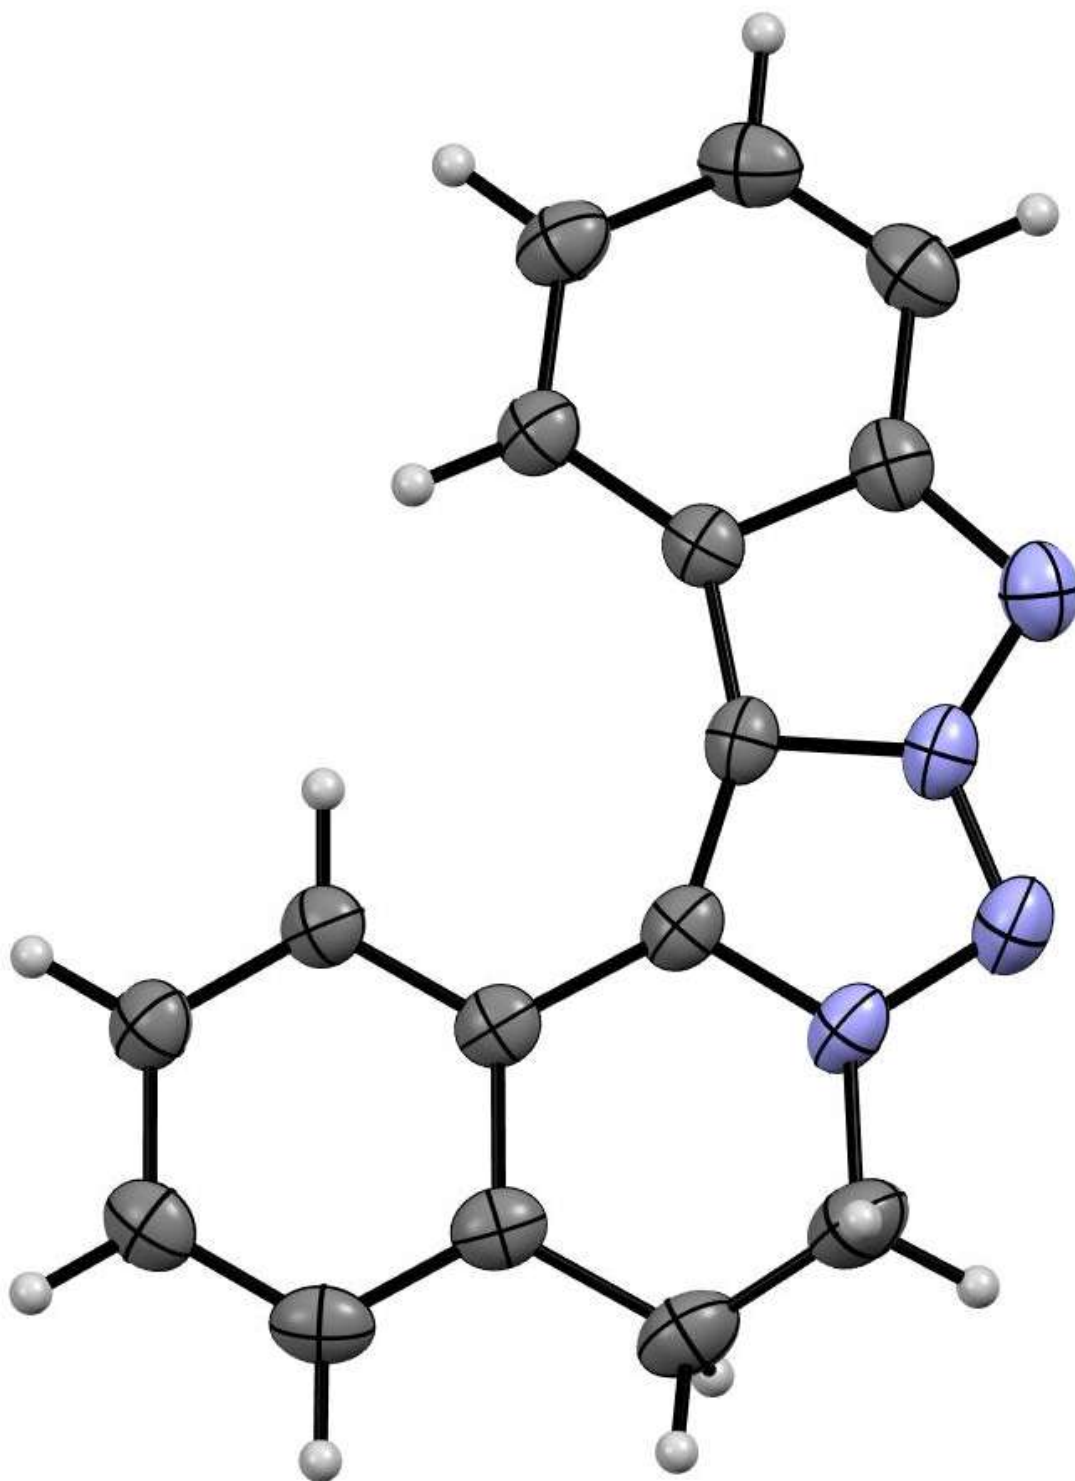

**Table S14. Crystal data and structure refinement for 35.**

|                                             |                                                   |
|---------------------------------------------|---------------------------------------------------|
| Empirical formula                           | C <sub>16</sub> H <sub>12</sub> N <sub>4</sub>    |
| Formula weight                              | 260.30                                            |
| Temperature/K                               | 90                                                |
| Crystal system                              | triclinic                                         |
| Space group                                 | P-1                                               |
| a/Å                                         | 9.3536(3)                                         |
| b/Å                                         | 10.4366(3)                                        |
| c/Å                                         | 13.3657(4)                                        |
| α/°                                         | 78.907(2)                                         |
| β/°                                         | 79.540(3)                                         |
| γ/°                                         | 76.410(3)                                         |
| Volume/Å <sup>3</sup>                       | 1231.75(7)                                        |
| Z                                           | 4                                                 |
| ρ <sub>calc</sub> /mg/mm <sup>3</sup>       | 1.404                                             |
| μ/mm <sup>-1</sup>                          | 0.694                                             |
| F(000)                                      | 544.0                                             |
| Crystal size/mm <sup>3</sup>                | 0.414 × 0.062 × 0.017                             |
| 2θ range for data collection                | 6.81 to 148.726°                                  |
| Index ranges                                | -11 ≤ h ≤ 11, -12 ≤ k ≤ 12, -16 ≤ l ≤ 16          |
| Reflections collected                       | 32072                                             |
| Independent reflections                     | 4815[R(int) = 0.0423]                             |
| Data/restraints/parameters                  | 4815/528/361                                      |
| Goodness-of-fit on F <sup>2</sup>           | 1.109                                             |
| Final R indexes [I ≥ 2σ (I)]                | R <sub>1</sub> = 0.0595, wR <sub>2</sub> = 0.1376 |
| Final R indexes [all data]                  | R <sub>1</sub> = 0.0699, wR <sub>2</sub> = 0.1434 |
| Largest diff. peak/hole / e Å <sup>-3</sup> | 0.51/-0.32                                        |

**Table S15. Fractional Atomic Coordinates ( $\times 10^4$ ) and Equivalent Isotropic Displacement Parameters ( $\text{\AA}^2 \times 10^3$ ) for 35.  $U_{\text{eq}}$  is defined as 1/3 of the trace of the orthogonalised  $U_{\text{IJ}}$  tensor of 35.**

| Atom | <i>x</i>  | <i>y</i>    | <i>z</i>     | $U(\text{eq})$ |
|------|-----------|-------------|--------------|----------------|
| N28  | 6544 (2)  | 5773.9 (17) | 8422.4 (13)  | 31.9 (4)       |
| N11  | 7551 (2)  | 7067.2 (17) | 8910.3 (14)  | 33.8 (4)       |
| N20  | 5875 (2)  | 5135.1 (18) | 7916.9 (14)  | 35.5 (4)       |
| N25  | 3167 (2)  | 7881.4 (17) | 5994.5 (14)  | 34.9 (4)       |
| N26  | 1246 (2)  | 9155.1 (17) | 6525.3 (13)  | 33.9 (4)       |
| N22  | 4 (2)     | 9775.7 (19) | 7061.9 (14)  | 38.5 (4)       |
| N12  | 6870 (2)  | 6978.9 (18) | 8121.0 (14)  | 37.5 (4)       |
| N27  | 2055 (2)  | 7942.0 (19) | 6798.5 (14)  | 39.8 (4)       |
| C33  | 4233 (2)  | 9025 (2)    | 4374.0 (15)  | 29.1 (4)       |
| C3   | 8348 (2)  | 5977.5 (19) | 10552.0 (15) | 28.2 (4)       |
| C2   | 7646 (2)  | 5994.2 (19) | 9665.7 (15)  | 28.6 (4)       |
| C34  | 3074 (2)  | 8973 (2)    | 5256.4 (16)  | 30.2 (4)       |
| C1   | 6976 (2)  | 5108.1 (19) | 9346.1 (15)  | 27.8 (4)       |
| C36  | 749 (2)   | 11091 (2)   | 5505.8 (15)  | 29.0 (4)       |
| C35  | 1778 (2)  | 9843 (2)    | 5602.5 (15)  | 29.3 (4)       |
| C19  | 6552 (2)  | 3862 (2)    | 9473.8 (15)  | 27.8 (4)       |
| C14  | 5882 (2)  | 3956 (2)    | 8574.2 (15)  | 31.1 (4)       |
| C18  | 6692 (2)  | 2690 (2)    | 10193.7 (16) | 31.7 (4)       |
| C28  | 5511 (2)  | 7994 (2)    | 4380.0 (17)  | 33.0 (5)       |
| C40  | 593 (2)   | 12276 (2)   | 4794.6 (16)  | 33.0 (5)       |
| C21  | -294 (2)  | 10971 (2)   | 6424.3 (16)  | 33.6 (5)       |
| C8   | 9096 (2)  | 7013 (2)    | 10527.3 (17) | 32.7 (5)       |
| C4   | 8323 (2)  | 4965 (2)    | 11393.8 (16) | 32.5 (5)       |
| C32  | 4131 (2)  | 10079 (2)   | 3556.0 (16)  | 32.7 (5)       |
| C29  | 6647 (2)  | 8050 (2)    | 3547.9 (18)  | 37.3 (5)       |
| C7   | 9795 (2)  | 6993 (2)    | 11371.6 (18) | 35.6 (5)       |
| C31  | 5287 (2)  | 10137 (2)   | 2759.5 (16)  | 35.3 (5)       |
| C5   | 9059 (2)  | 4943 (2)    | 12207.7 (17) | 35.1 (5)       |
| C15  | 5327 (2)  | 2874 (2)    | 8420.9 (17)  | 35.9 (5)       |
| C30  | 6549 (3)  | 9112 (2)    | 2751.8 (17)  | 36.8 (5)       |
| C39  | -577 (3)  | 13318 (2)   | 5010.9 (18)  | 38.2 (5)       |
| C6   | 9792 (2)  | 5966 (2)    | 12193.7 (17) | 36.6 (5)       |
| C17  | 6184 (3)  | 1632 (2)    | 10008.8 (17) | 37.2 (5)       |
| C37  | -1489 (3) | 12039 (2)   | 6618.0 (18)  | 38.9 (5)       |
| C16  | 5501 (3)  | 1739 (2)    | 9128.8 (17)  | 38.7 (5)       |
| C38  | -1605 (3) | 13184 (2)   | 5919.5 (18)  | 40.4 (5)       |
| C9   | 9180 (3)  | 8046 (2)    | 9578 (2)     | 43.6 (5)       |
| C27  | 5647 (3)  | 6929 (2)    | 5310 (2)     | 44.8 (5)       |
| C10  | 7932 (3)  | 8308 (2)    | 8979 (2)     | 44.8 (5)       |
| C26  | 4234 (3)  | 6642 (2)    | 5902 (2)     | 48.2 (5)       |

**Table S16. Anisotropic Displacement Parameters ( $\text{\AA}^2 \times 10^3$ ) for 35. The Anisotropic displacement factor exponent takes the form:  $-2\pi^2[h^2a^{*2}U_{11}+2hka^*b^*U_{12}+\dots]$ .**

| Atom | $U_{11}$ | $U_{22}$ | $U_{33}$ | $U_{23}$ | $U_{13}$ | $U_{12}$ |
|------|----------|----------|----------|----------|----------|----------|
| N28  | 37.7(9)  | 28.7(9)  | 27.0(8)  | -4.2(7)  | -3.4(7)  | -3.8(7)  |
| N11  | 43.9(10) | 26.1(9)  | 30.3(9)  | -5.8(7)  | -1.3(8)  | -6.8(7)  |
| N20  | 41.5(10) | 36.9(10) | 29.6(9)  | -9.4(8)  | -8.0(8)  | -5.1(8)  |
| N25  | 48.8(11) | 26.7(9)  | 30.2(9)  | -2.9(7)  | -11.2(8) | -6.7(8)  |
| N26  | 44.2(10) | 31.7(9)  | 28.5(9)  | -2.2(7)  | -6.9(8)  | -14.0(8) |
| N22  | 44.8(11) | 40.7(10) | 32.5(10) | -7.3(8)  | -1.8(8)  | -15.5(8) |
| N12  | 49.9(11) | 30.4(9)  | 29.7(9)  | -1.4(8)  | -5.4(8)  | -6.7(8)  |
| N27  | 55.5(12) | 33.3(10) | 31.0(9)  | -0.5(8)  | -8.0(9)  | -12.3(8) |
| C33  | 36.3(11) | 27.7(10) | 28.4(10) | -11.1(8) | -9.6(8)  | -7.3(8)  |
| C3   | 29.9(10) | 25.1(9)  | 29.0(10) | -10.7(8) | 1.0(8)   | -3.3(8)  |
| C2   | 32.4(10) | 23.5(9)  | 28.1(10) | -6.0(8)  | 1.9(8)   | -5.2(8)  |
| C34  | 39.2(11) | 27.7(10) | 28.2(10) | -6.0(8)  | -11.9(8) | -9.0(8)  |
| C1   | 30.0(10) | 27.3(10) | 24.7(9)  | -5.3(8)  | -2.0(8)  | -3.2(8)  |
| C36  | 32.3(10) | 32.1(10) | 27.0(10) | -10.7(8) | -7.0(8)  | -8.3(8)  |
| C35  | 36.3(11) | 30.7(10) | 25.0(9)  | -4.2(8)  | -7.5(8)  | -12.5(8) |
| C19  | 27.9(10) | 30.4(10) | 26.2(10) | -11.4(8) | -0.1(8)  | -5.2(8)  |
| C14  | 31.2(10) | 35.2(11) | 26.7(10) | -9.8(9)  | -2.0(8)  | -4.4(8)  |
| C18  | 38.7(11) | 32.8(10) | 25.8(10) | -8.2(8)  | -0.9(8)  | -11.4(9) |
| C28  | 37.0(11) | 27.8(10) | 39.8(11) | -11.5(9) | -13.3(9) | -7.0(8)  |
| C40  | 39.2(11) | 33.2(11) | 29.0(10) | -7.3(9)  | -9.2(9)  | -6.8(9)  |
| C21  | 37.3(11) | 38.4(11) | 30.5(10) | -10.3(9) | -5.5(9)  | -14.1(9) |
| C8   | 31.7(10) | 26.6(10) | 39.3(11) | -11.3(9) | 0.9(9)   | -4.9(8)  |
| C4   | 38.4(11) | 31.4(10) | 30.2(10) | -10.2(9) | -0.5(9)  | -11.1(9) |
| C32  | 38.3(11) | 32.7(11) | 28.6(10) | -9.8(9)  | -8.1(9)  | -3.8(9)  |
| C29  | 36.4(11) | 33.9(11) | 46.1(13) | 18.8(10) | 11.2(10) | -2.2(9)  |
| C7   | 33.6(11) | 32.2(11) | 44.8(12) | 16.1(10) | -0.5(9)  | -9.8(8)  |
| C31  | 43.7(12) | 35.8(11) | 27.9(10) | -8.4(9)  | -7.1(9)  | -7.3(9)  |
| C5   | 44.1(12) | 34.4(11) | 28.4(10) | -7.7(9)  | -4.2(9)  | -9.5(9)  |
| C15  | 35.4(11) | 46.3(12) | 30.7(11) | 15.8(10) | -2.8(9)  | -11.2(9) |
| C30  | 39.2(12) | 42.5(12) | 33.7(11) | 18.5(10) | -4.3(9)  | -8.9(9)  |
| C39  | 47.3(13) | 33.7(11) | 35.3(11) | -7.8(9)  | 15.5(10) | -2.5(9)  |
| C6   | 37.7(11) | 41.3(12) | 34.6(11) | 17.6(10) | -3.7(9)  | -7.5(9)  |
| C17  | 49.9(13) | 34.4(11) | 30.2(11) | -6.1(9)  | 0.1(9)   | -17.8(9) |
| C37  | 36.2(11) | 49.6(13) | 35.9(11) | 19.5(10) | -3.0(9)  | 10.0(10) |
| C16  | 45.0(12) | 42.7(12) | 35.3(11) | 17.0(10) | 2.0(10)  | 19.9(10) |
| C38  | 40.1(12) | 45.1(13) | 39.1(12) | 20.2(10) | 10.9(10) | 0.0(10)  |
| C9   | 51.4(11) | 31.0(9)  | 49.8(11) | -4.4(8)  | -5.2(9)  | -14.7(8) |
| C27  | 52.6(11) | 30.7(9)  | 50.9(11) | -4.8(8)  | -16.5(9) | -2.9(8)  |
| C10  | 56.8(11) | 31.8(9)  | 47.3(11) | -4.3(8)  | -3.7(9)  | -16.3(8) |
| C26  | 57.5(11) | 34.1(9)  | 48.8(11) | -2.4(9)  | -15.3(9) | 1.5(9)   |

**Table S17. Bond Lengths for 35.**

| Atom | Atom | Length/Å  | Atom | Atom | Length/Å  |
|------|------|-----------|------|------|-----------|
| N28  | N20  | 1.347 (2) | C36  | C40  | 1.403 (3) |
| N28  | N12  | 1.333 (2) | C36  | C21  | 1.428 (3) |
| N28  | C1   | 1.375 (3) | C19  | C14  | 1.431 (3) |
| N11  | N12  | 1.355 (3) | C19  | C18  | 1.399 (3) |
| N11  | C2   | 1.353 (3) | C14  | C15  | 1.410 (3) |
| N11  | C10  | 1.445 (3) | C18  | C17  | 1.378 (3) |
| N20  | C14  | 1.367 (3) | C28  | C29  | 1.394 (3) |
| N25  | N27  | 1.353 (3) | C28  | C27  | 1.502 (3) |
| N25  | C34  | 1.353 (3) | C40  | C39  | 1.383 (3) |
| N25  | C26  | 1.448 (3) | C21  | C37  | 1.407 (3) |
| N26  | N22  | 1.344 (3) | C8   | C7   | 1.397 (3) |
| N26  | N27  | 1.334 (3) | C8   | C9   | 1.502 (3) |
| N26  | C35  | 1.374 (3) | C4   | C5   | 1.383 (3) |
| N22  | C21  | 1.369 (3) | C32  | C31  | 1.376 (3) |
| C33  | C34  | 1.452 (3) | C29  | C30  | 1.380 (3) |
| C33  | C28  | 1.408 (3) | C7   | C6   | 1.380 (3) |
| C33  | C32  | 1.393 (3) | C31  | C30  | 1.394 (3) |
| C3   | C2   | 1.451 (3) | C5   | C6   | 1.393 (3) |
| C3   | C8   | 1.411 (3) | C15  | C16  | 1.364 (3) |
| C3   | C4   | 1.388 (3) | C39  | C38  | 1.412 (3) |
| C2   | C1   | 1.397 (3) | C17  | C16  | 1.412 (3) |
| C34  | C35  | 1.396 (3) | C37  | C38  | 1.363 (3) |
| C1   | C19  | 1.417 (3) | C9   | C10  | 1.477 (3) |
| C36  | C35  | 1.425 (3) | C27  | C26  | 1.476 (4) |

**Table S18. Bond Angles for 35.**

| Atom | Atom | Atom | Angle/°     | Atom | Atom | Atom | Angle/°     |
|------|------|------|-------------|------|------|------|-------------|
| N20  | N28  | C1   | 117.07 (17) | C34  | C35  | C36  | 151.9 (2)   |
| N12  | N28  | N20  | 127.49 (17) | C1   | C19  | C14  | 103.38 (17) |
| N12  | N28  | C1   | 115.42 (17) | C18  | C19  | C1   | 136.18 (19) |
| N12  | N11  | C10  | 120.33 (18) | C18  | C19  | C14  | 120.39 (18) |
| C2   | N11  | N12  | 115.08 (17) | N20  | C14  | C19  | 114.13 (18) |
| C2   | N11  | C10  | 123.99 (19) | N20  | C14  | C15  | 125.85 (19) |
| N28  | N20  | C14  | 100.94 (16) | C15  | C14  | C19  | 120.00 (19) |
| N27  | N25  | C34  | 115.38 (18) | C17  | C18  | C19  | 118.44 (19) |
| N27  | N25  | C26  | 119.80 (18) | C33  | C28  | C27  | 119.0 (2)   |
| C34  | N25  | C26  | 124.3 (2)   | C29  | C28  | C33  | 118.5 (2)   |
| N22  | N26  | C35  | 117.32 (17) | C29  | C28  | C27  | 122.4 (2)   |
| N27  | N26  | N22  | 127.18 (18) | C39  | C40  | C36  | 118.5 (2)   |
| N27  | N26  | C35  | 115.49 (19) | N22  | C21  | C36  | 114.30 (19) |
| N26  | N22  | C21  | 100.87 (17) | N22  | C21  | C37  | 125.6 (2)   |
| N28  | N12  | N11  | 100.85 (15) | C37  | C21  | C36  | 120.1 (2)   |
| N26  | N27  | N25  | 100.61 (16) | C3   | C8   | C9   | 119.0 (2)   |
| C28  | C33  | C34  | 118.00 (19) | C7   | C8   | C3   | 118.3 (2)   |
| C32  | C33  | C34  | 121.89 (19) | C7   | C8   | C9   | 122.69 (19) |
| C32  | C33  | C28  | 120.1 (2)   | C5   | C4   | C3   | 120.34 (19) |
| C8   | C3   | C2   | 117.92 (18) | C31  | C32  | C33  | 120.4 (2)   |
| C4   | C3   | C2   | 121.65 (18) | C30  | C29  | C28  | 121.0 (2)   |
| C4   | C3   | C8   | 120.41 (19) | C6   | C7   | C8   | 120.87 (19) |
| N11  | C2   | C3   | 120.00 (18) | C32  | C31  | C30  | 119.9 (2)   |
| N11  | C2   | C1   | 104.85 (17) | C4   | C5   | C6   | 119.6 (2)   |
| C1   | C2   | C3   | 135.15 (18) | C16  | C15  | C14  | 118.1 (2)   |
| N25  | C34  | C33  | 119.76 (19) | C29  | C30  | C31  | 120.0 (2)   |
| N25  | C34  | C35  | 104.71 (19) | C40  | C39  | C38  | 120.7 (2)   |
| C35  | C34  | C33  | 135.50 (19) | C7   | C6   | C5   | 120.4 (2)   |
| N28  | C1   | C2   | 103.80 (17) | C18  | C17  | C16  | 120.9 (2)   |
| N28  | C1   | C19  | 104.47 (17) | C38  | C37  | C21  | 118.4 (2)   |
| C2   | C1   | C19  | 151.69 (19) | C15  | C16  | C17  | 122.1 (2)   |
| C35  | C36  | C21  | 103.25 (18) | C37  | C38  | C39  | 122.0 (2)   |
| C40  | C36  | C35  | 136.5 (2)   | C10  | C9   | C8   | 115.4 (2)   |
| C40  | C36  | C21  | 120.21 (19) | C26  | C27  | C28  | 115.8 (2)   |
| N26  | C35  | C34  | 103.82 (17) | N11  | C10  | C9   | 110.12 (19) |
| N26  | C35  | C36  | 104.27 (18) | N25  | C26  | C27  | 109.5 (2)   |

**Table S19. Torsion Angles for 35.**

| A   | B   | C   | D   | Angle/°     | A   | B   | C   | D   | Angle/°     |
|-----|-----|-----|-----|-------------|-----|-----|-----|-----|-------------|
| N28 | N20 | C14 | C19 | -0.3 (2)    | C1  | C19 | C14 | C15 | 179.28 (19) |
| N28 | N20 | C14 | C15 | -179.0 (2)  | C1  | C19 | C18 | C17 | -176.3 (2)  |
| N28 | C1  | C19 | C14 | -0.5 (2)    | C36 | C40 | C39 | C38 | -1.0 (3)    |
| N28 | C1  | C19 | C18 | 176.8 (2)   | C36 | C21 | C37 | C38 | -1.0 (3)    |
| N11 | C2  | C1  | N28 | -0.4 (2)    | C35 | N26 | N22 | C21 | 0.2 (2)     |
| N11 | C2  | C1  | C19 | 176.5 (4)   | C35 | N26 | N27 | N25 | 0.5 (2)     |
| N20 | N28 | N12 | N11 | -           | C35 | C36 | C40 | C39 | -177.3 (2)  |
|     |     |     |     | 178.42 (19) |     |     |     |     |             |
| N20 | N28 | C1  | C2  | 178.83 (17) | C35 | C36 | C21 | N22 | -0.1 (2)    |
| N20 | N28 | C1  | C19 | 0.4 (2)     | C35 | C36 | C21 | C37 | 178.89 (18) |
| N20 | C14 | C15 | C16 | 176.2 (2)   | C19 | C14 | C15 | C16 | -2.4 (3)    |
| N25 | C34 | C35 | N26 | 0.2 (2)     | C19 | C18 | C17 | C16 | -1.7 (3)    |
| N25 | C34 | C35 | C36 | 176.8 (3)   | C14 | C19 | C18 | C17 | 0.6 (3)     |
| N26 | N22 | C21 | C36 | -0.1 (2)    | C14 | C15 | C16 | C17 | 1.4 (3)     |
| N26 | N22 | C21 | C37 | -           | C18 | C19 | C14 | N20 | -           |
|     |     |     |     | 178.98 (19) |     |     |     |     | 177.33 (19) |
| N22 | N26 | N27 | N25 | -           | C18 | C19 | C14 | C15 | 1.5 (3)     |
|     |     |     |     | 177.88 (19) |     |     |     |     |             |
| N22 | N26 | C35 | C34 | 178.06 (17) | C18 | C17 | C16 | C15 | 0.7 (4)     |
| N22 | N26 | C35 | C36 | -0.3 (2)    | C28 | C33 | C34 | N25 | -7.4 (3)    |
| N22 | C21 | C37 | C38 | 177.9 (2)   | C28 | C33 | C34 | C35 | 170.1 (2)   |
| N12 | N28 | N20 | C14 | 178.4 (2)   | C28 | C33 | C32 | C31 | -1.3 (3)    |
| N12 | N28 | C1  | C2  | 0.2 (2)     | C28 | C29 | C30 | C31 | -1.5 (3)    |
| N12 | N28 | C1  | C19 | -           | C28 | C27 | C26 | N25 | -42.1 (3)   |
|     |     |     |     | 178.25 (17) |     |     |     |     |             |
| N12 | N11 | C2  | C3  | -           | C40 | C36 | C35 | N26 | 178.4 (2)   |
|     |     |     |     | 179.79 (18) |     |     |     |     |             |
| N12 | N11 | C2  | C1  | 0.4 (2)     | C40 | C36 | C35 | C34 | 1.8 (5)     |
| N12 | N11 | C10 | C9  | -155.3 (2)  | C40 | C36 | C21 | N22 | -           |
|     |     |     |     |             |     |     |     |     | 178.66 (18) |
| N27 | N25 | C34 | C33 | 178.30 (17) | C40 | C36 | C21 | C37 | 0.3 (3)     |
| N27 | N25 | C34 | C35 | 0.1 (2)     | C40 | C39 | C38 | C37 | 0.3 (3)     |
| N27 | N25 | C26 | C27 | -154.1 (2)  | C21 | C36 | C35 | N26 | 0.2 (2)     |
| N27 | N26 | N22 | C21 | 178.57 (19) | C21 | C36 | C35 | C34 | -176.4 (3)  |
| N27 | N26 | C35 | C34 | -0.5 (2)    | C21 | C36 | C40 | C39 | 0.7 (3)     |
| N27 | N26 | C35 | C36 | -           | C21 | C37 | C38 | C39 | 0.7 (3)     |
|     |     |     |     | 178.82 (17) |     |     |     |     |             |
| C33 | C34 | C35 | N26 | -177.6 (2)  | C8  | C3  | C2  | N11 | -8.6 (3)    |
| C33 | C34 | C35 | C36 | -1.0 (5)    | C8  | C3  | C2  | C1  | 171.1 (2)   |
| C33 | C28 | C29 | C30 | 2.3 (3)     | C8  | C3  | C4  | C5  | -1.5 (3)    |
| C33 | C28 | C27 | C26 | 28.9 (3)    | C8  | C7  | C6  | C5  | -1.6 (3)    |
| C33 | C32 | C31 | C30 | 2.1 (3)     | C8  | C9  | C10 | N11 | -42.2 (3)   |
| C3  | C2  | C1  | N28 | 179.9 (2)   | C4  | C3  | C2  | N11 | 172.78 (19) |
| C3  | C2  | C1  | C19 | -3.2 (6)    | C4  | C3  | C2  | C1  | -7.5 (4)    |
| C3  | C8  | C7  | C6  | 2.0 (3)     | C4  | C3  | C8  | C7  | -0.4 (3)    |
| C3  | C8  | C9  | C10 | 28.9 (3)    | C4  | C3  | C8  | C9  | 176.3 (2)   |
| C3  | C4  | C5  | C6  | 1.9 (3)     | C4  | C5  | C6  | C7  | -0.4 (3)    |
| C2  | N11 | N12 | N28 | -0.3 (2)    | C32 | C33 | C34 | N25 | 174.93 (18) |
| C2  | N11 | C10 | C9  | 33.9 (3)    | C32 | C33 | C34 | C35 | -7.5 (3)    |
| C2  | C3  | C8  | C7  | -           | C32 | C33 | C28 | C29 | -0.9 (3)    |
|     |     |     |     | 179.05 (18) |     |     |     |     |             |



|     |     |     |     |             |     |     |     |     |             |
|-----|-----|-----|-----|-------------|-----|-----|-----|-----|-------------|
| C2  | C3  | C8  | C9  | -2.3 (3)    | C32 | C33 | C28 | C27 | 175.07 (19) |
| C2  | C3  | C4  | C5  | 177.1 (2)   | C32 | C31 | C30 | C29 | -0.7 (3)    |
| C2  | C1  | C19 | C14 | -177.3 (4)  | C29 | C28 | C27 | C26 | -155.4 (2)  |
| C2  | C1  | C19 | C18 | -0.1 (6)    | C7  | C8  | C9  | C10 | -154.5 (2)  |
| C34 | N25 | N27 | N26 | -0.3 (2)    | C9  | C8  | C7  | C6  | -174.7 (2)  |
| C34 | N25 | C26 | C27 | 34.8 (3)    | C27 | C28 | C29 | C30 | -173.5 (2)  |
| C34 | C33 | C28 | C29 | -           | C10 | N11 | N12 | N28 | -           |
|     |     |     |     | 178.56 (18) |     |     |     |     | 171.83 (19) |
| C34 | C33 | C28 | C27 | -2.6 (3)    | C10 | N11 | C2  | C3  | -8.6 (3)    |
| C34 | C33 | C32 | C31 | 176.27 (18) | C10 | N11 | C2  | C1  | 171.6 (2)   |
| C1  | N28 | N20 | C14 | -0.1 (2)    | C26 | N25 | N27 | N26 | -           |
|     |     |     |     |             |     |     |     |     | 172.25 (19) |
| C1  | N28 | N12 | N11 | 0.0 (2)     | C26 | N25 | C34 | C33 | -10.2 (3)   |
| C1  | C19 | C14 | N20 | 0.5 (2)     | C26 | N25 | C34 | C35 | 171.6 (2)   |

**Table S20. Hydrogen Atom Coordinates ( $\text{\AA}\times 10^4$ ) and Isotropic Displacement Parameters ( $\text{\AA}^2\times 10^3$ ) for 35.**

| Atom | x        | y        | z        | U(eq) |
|------|----------|----------|----------|-------|
| H18  | 7126.91  | 2624.39  | 10795.84 | 38    |
| H40  | 1276.59  | 12360.68 | 4178.1   | 40    |
| H4   | 7796.85  | 4283.38  | 11410.89 | 39    |
| H32  | 3258.42  | 10763.07 | 3548.03  | 39    |
| H29  | 7500.08  | 7345.35  | 3528.64  | 45    |
| H7   | 10277.48 | 7695.53  | 11379.61 | 43    |
| H31  | 5224.8   | 10873.63 | 2215.49  | 42    |
| H5   | 9065.28  | 4234.76  | 12773.15 | 42    |
| H15  | 4845.29  | 2935.01  | 7840.9   | 43    |
| H30  | 7342.65  | 9146.02  | 2198.15  | 44    |
| H39  | -690.55  | 14133.23 | 4543.24  | 46    |
| H6   | 10293.46 | 5955.78  | 12753.73 | 44    |
| H17  | 6295.51  | 819.72   | 10479.86 | 45    |
| H37  | -2198.12 | 11964.54 | 7221.52  | 47    |
| H16  | 5152.25  | 996      | 9026.39  | 46    |
| H38  | -2402.36 | 13913.82 | 6047.96  | 48    |
| H9A  | 9231.72  | 8893.47  | 9784.33  | 52    |
| H9B  | 10115.75 | 7757.65  | 9122.56  | 52    |
| H27A | 6254.33  | 6094.54  | 5083.01  | 54    |
| H27B | 6194.65  | 7196.92  | 5776.39  | 54    |
| H10A | 7059.48  | 8891.58  | 9317.17  | 54    |
| H10B | 8216.51  | 8774.84  | 8278.54  | 54    |
| H26A | 3842.89  | 6075.59  | 5547.26  | 58    |
| H26B | 4404.68  | 6150.55  | 6595.32  | 58    |

**Photophysical properties of 5,6-Dihydroindazolo[2',3':3,4][1,2,3]triazolo[5,1-*a*]isoquinolin-9-ium-10-ide (35).**

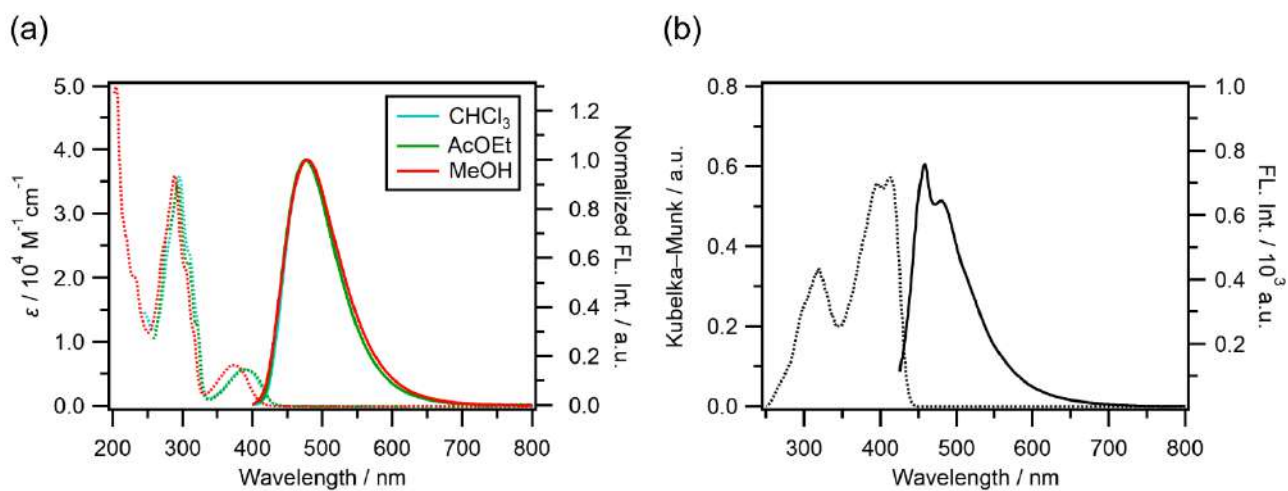

**Figure S4.** (a) Absorption (dotted lines on the left axis) and fluorescence (solid lines on the right axis) spectra of **35** (20 mM) in various solvents. The sky-blue, green, and red lines indicate conditions using *n*-hexane, CHCl<sub>3</sub>, AcOEt, and MeOH, respectively. (b) Kubelka-Munk diffuse reflectance spectra (dotted lines on the left axis) and fluorescence (solid lines on the right axis) spectra of **35** in the solid state.

# 1-(2-Azidoethyl)-2-(2,2-dibromovinyl)benzene (9).

<sup>1</sup>H NMR

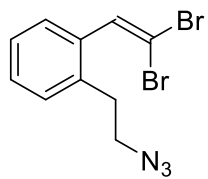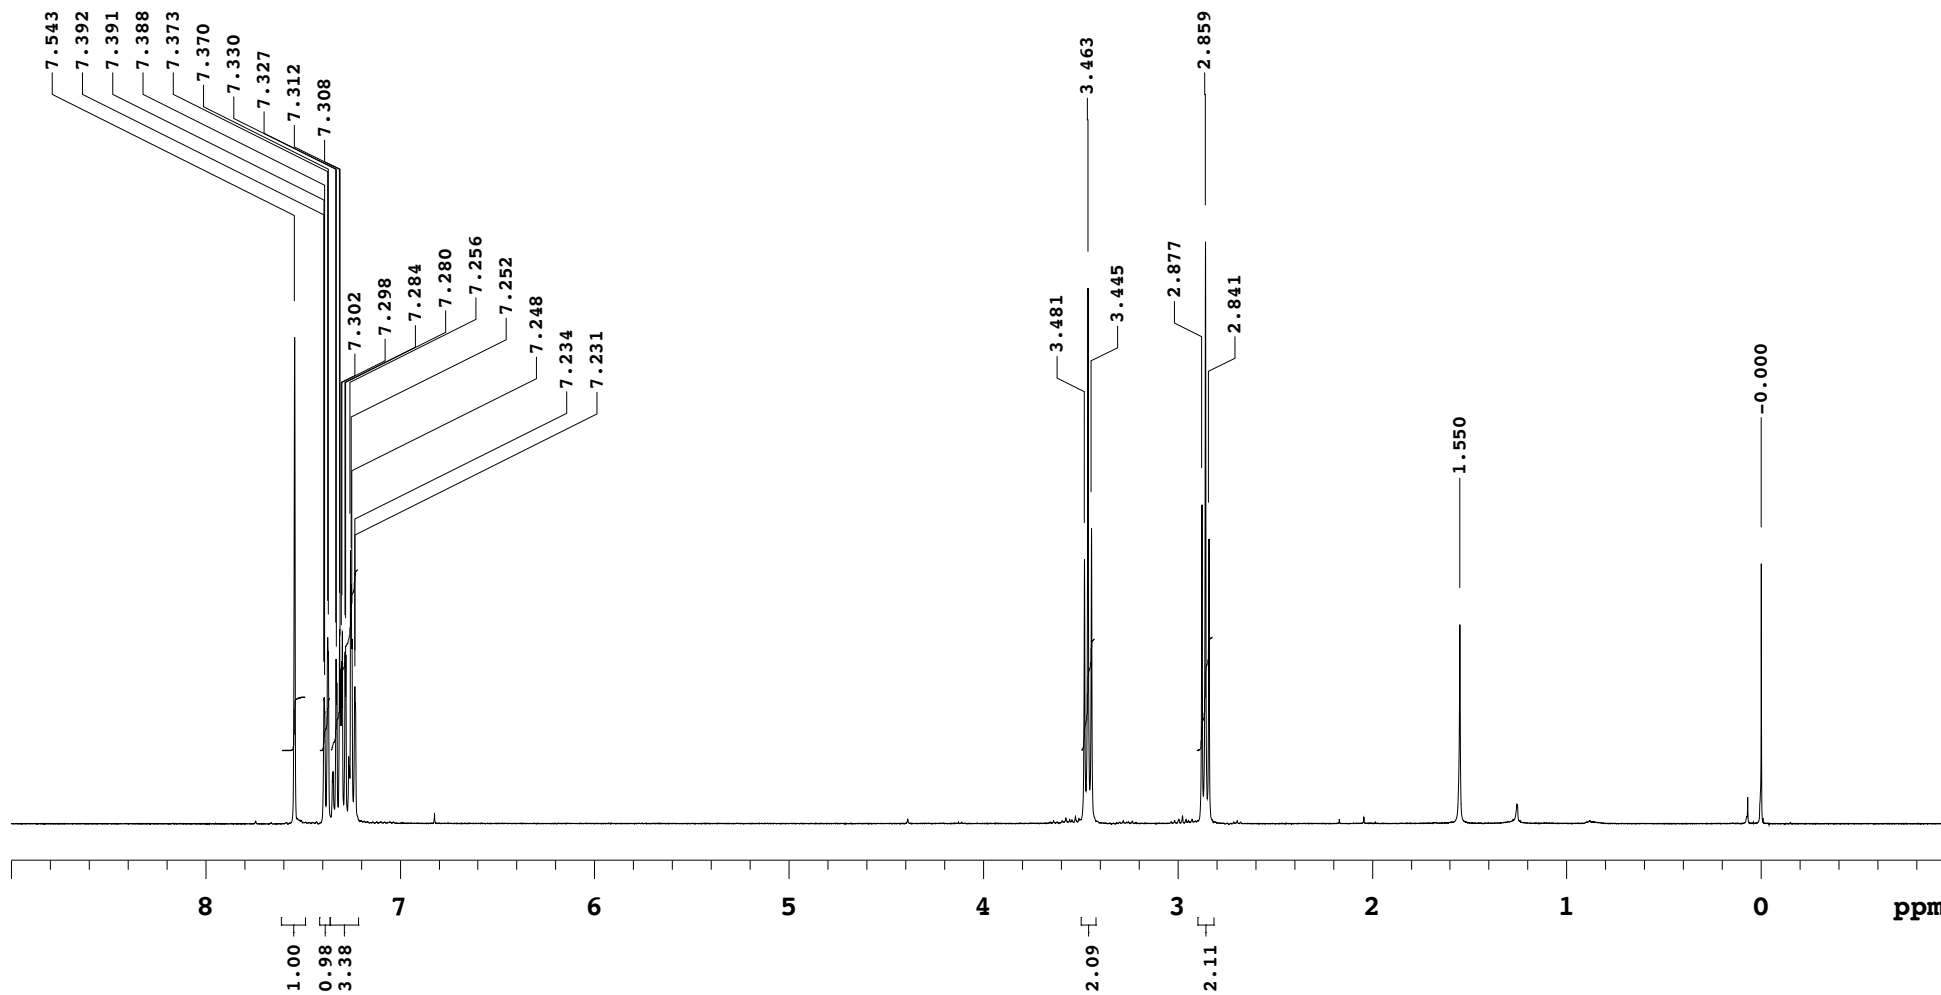

# 1-(2-Azidoethyl)-2-(2,2-dibromovinyl)benzene (9).

<sup>13</sup>C NMR

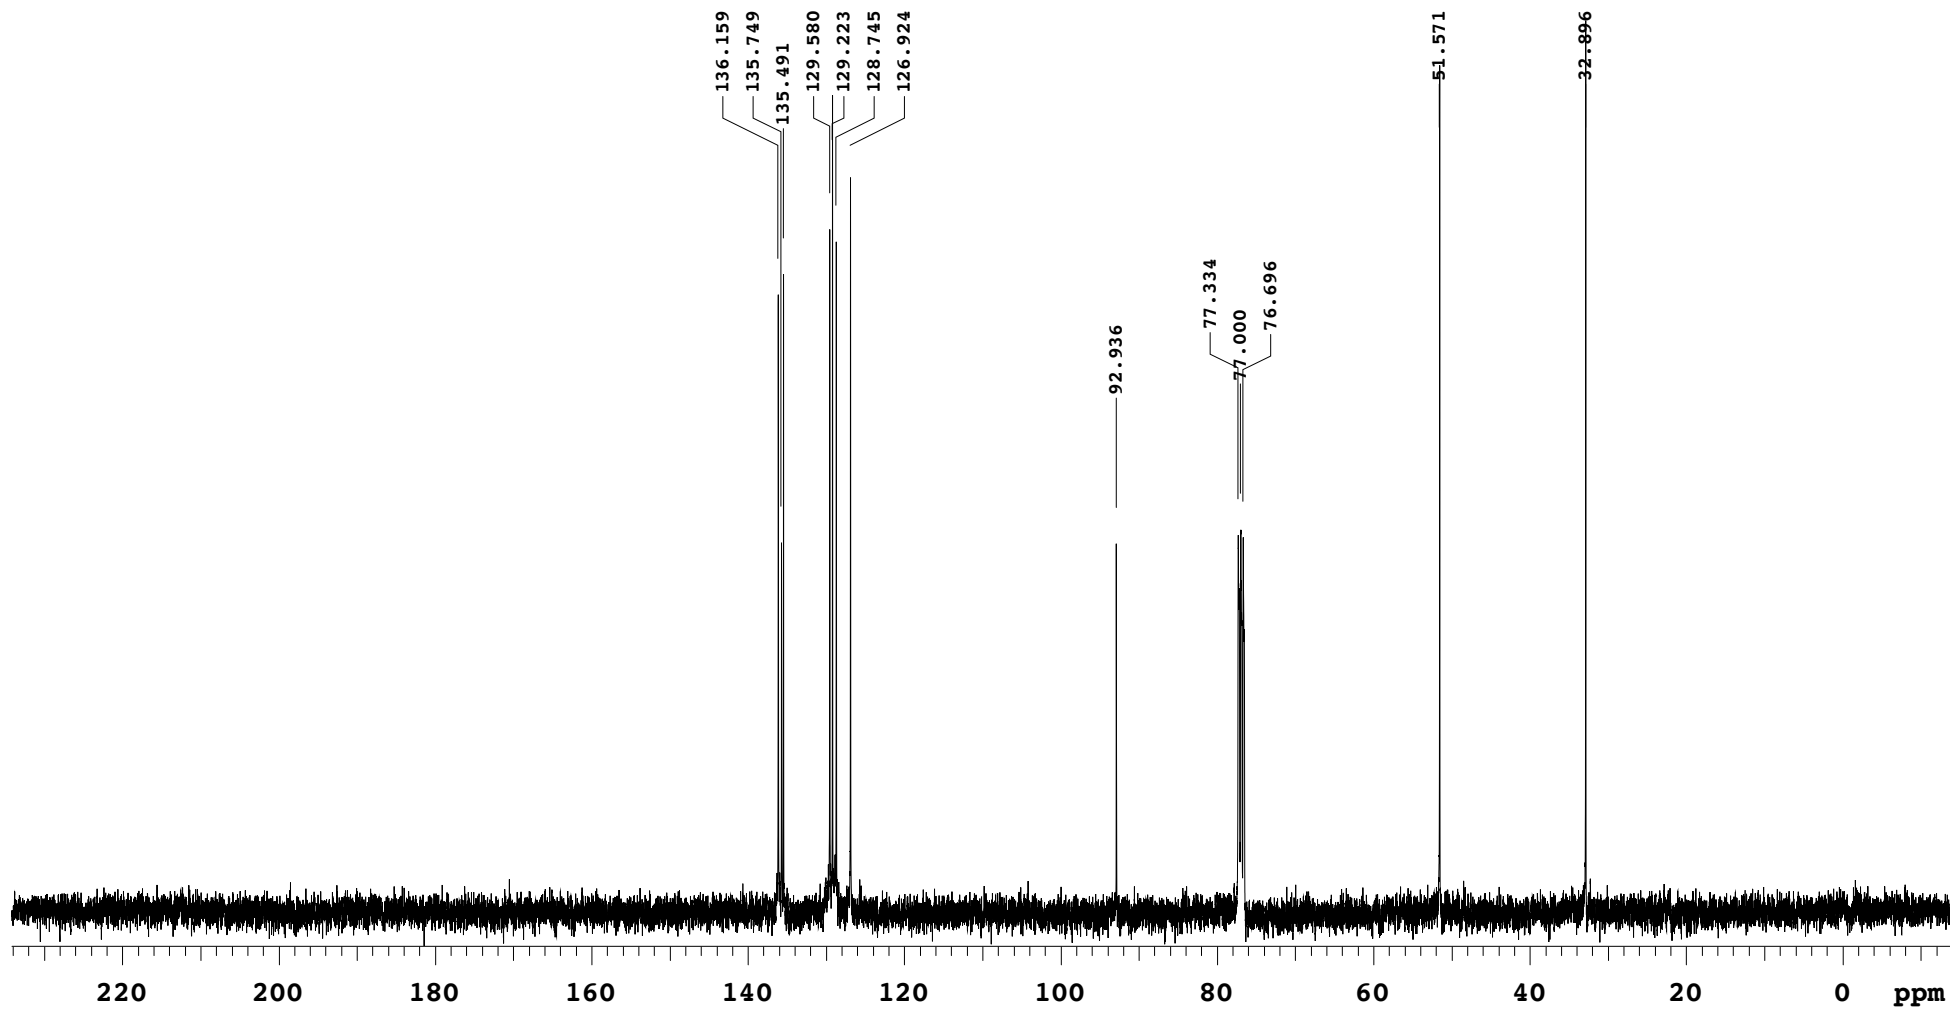

# 1-Bromo-5,6-dihydro-[1,2,3]triazolo[5,1-a]isoquinoline (10).

<sup>1</sup>H NMR

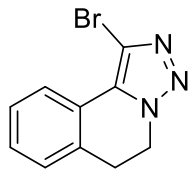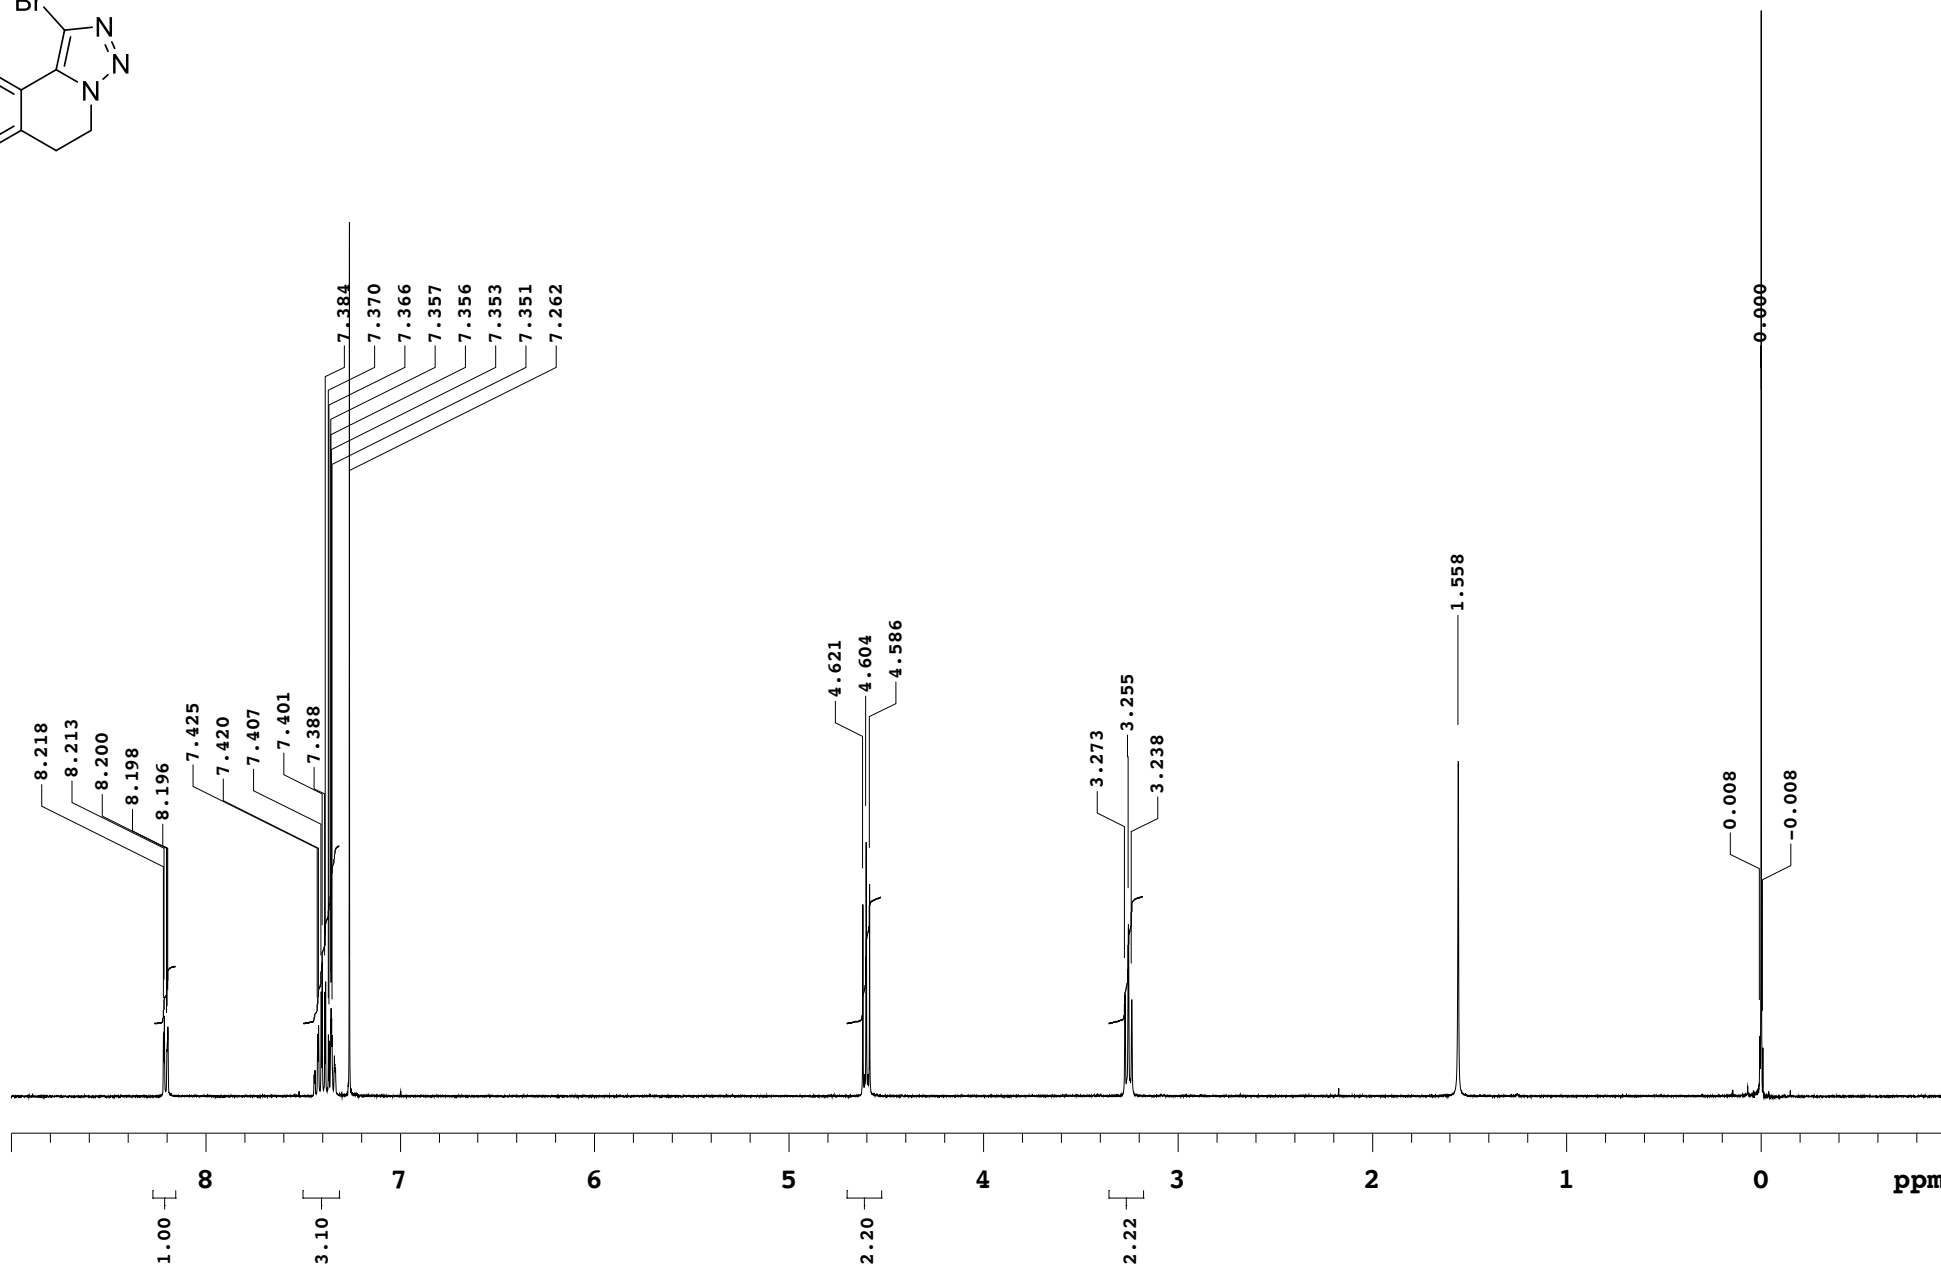

# 1-Bromo-5,6-dihydro-[1,2,3]triazolo[5,1-a]isoquinoline (10).

<sup>13</sup>C NMR

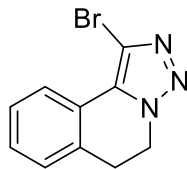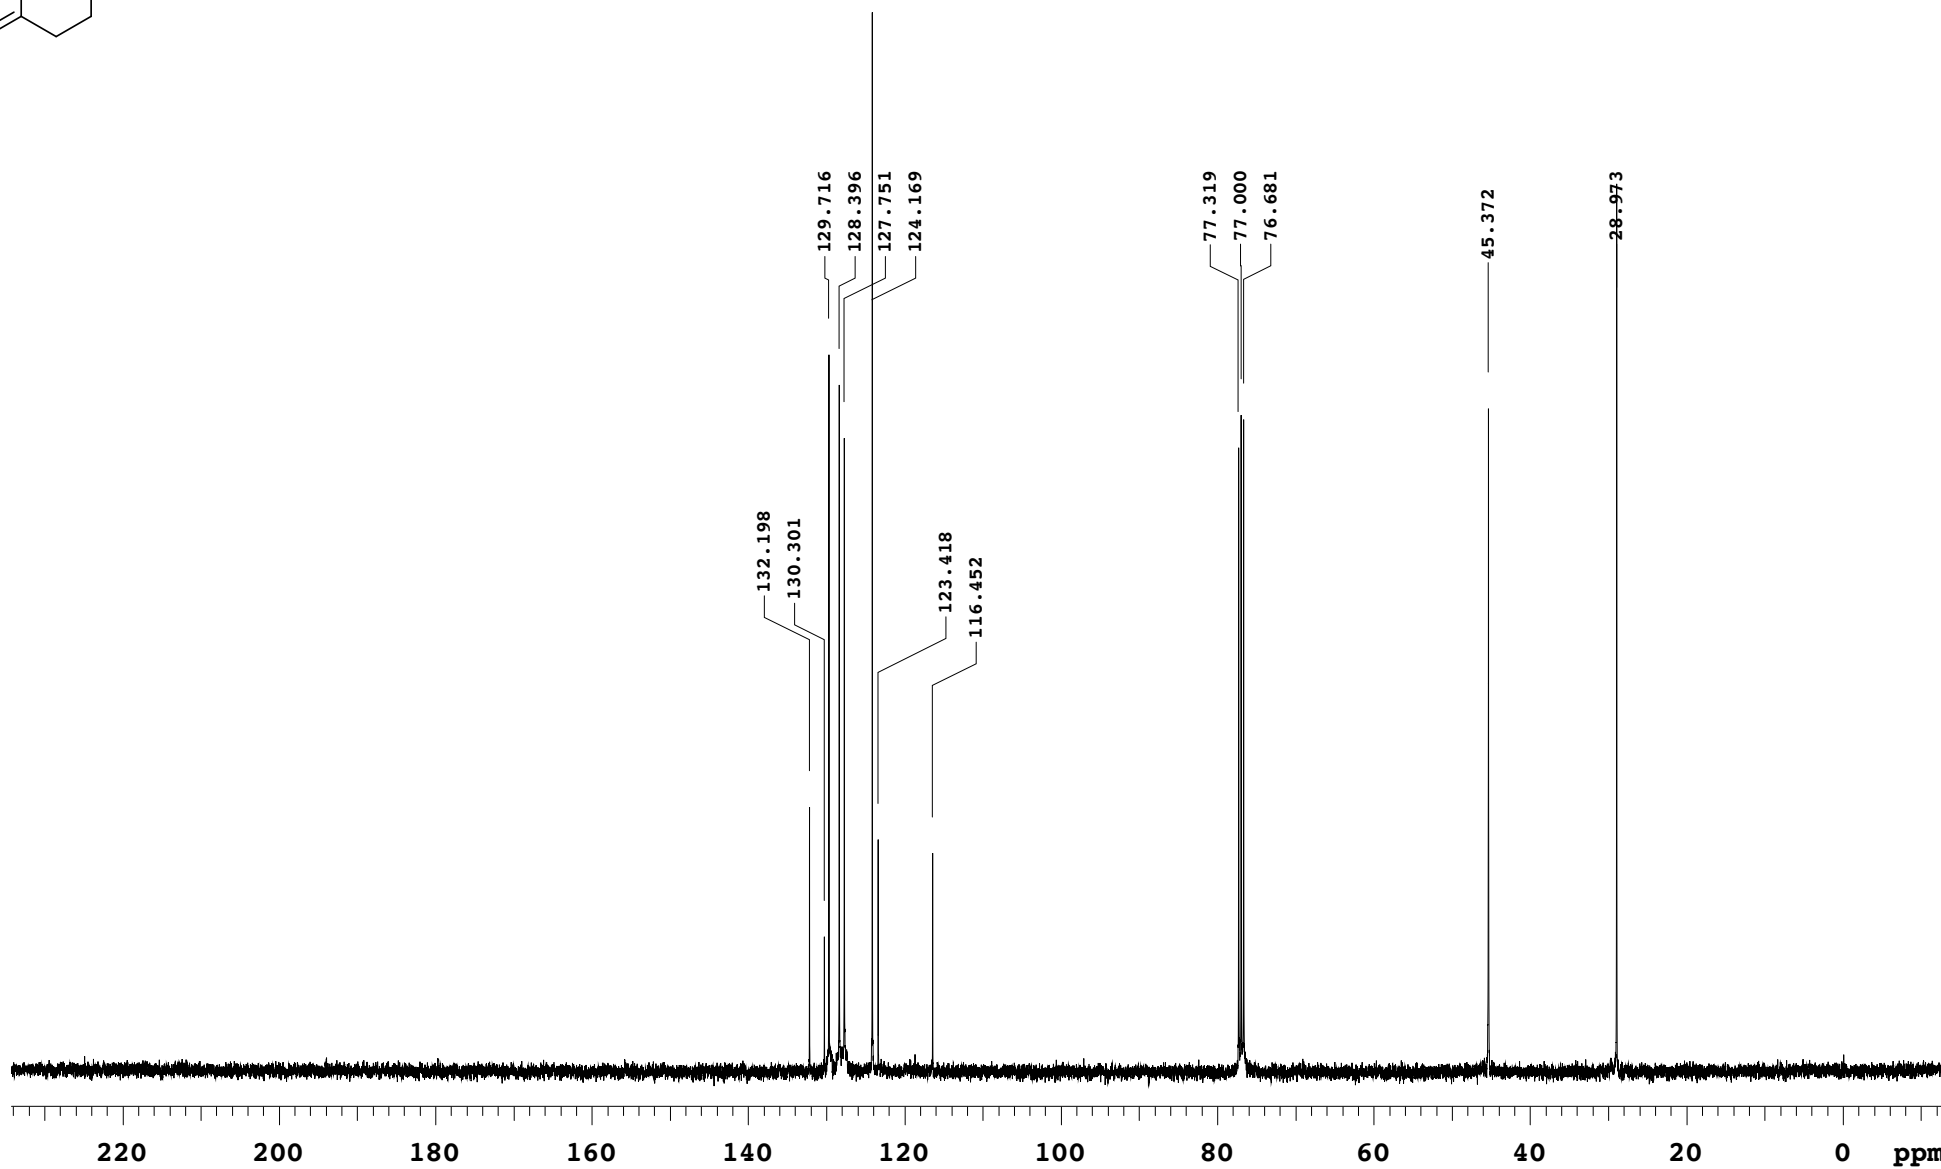

# 1-Bromo-[1,2,3]triazolo[5,1-*a*]isoquinoline (11).

<sup>1</sup>H NMR

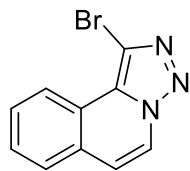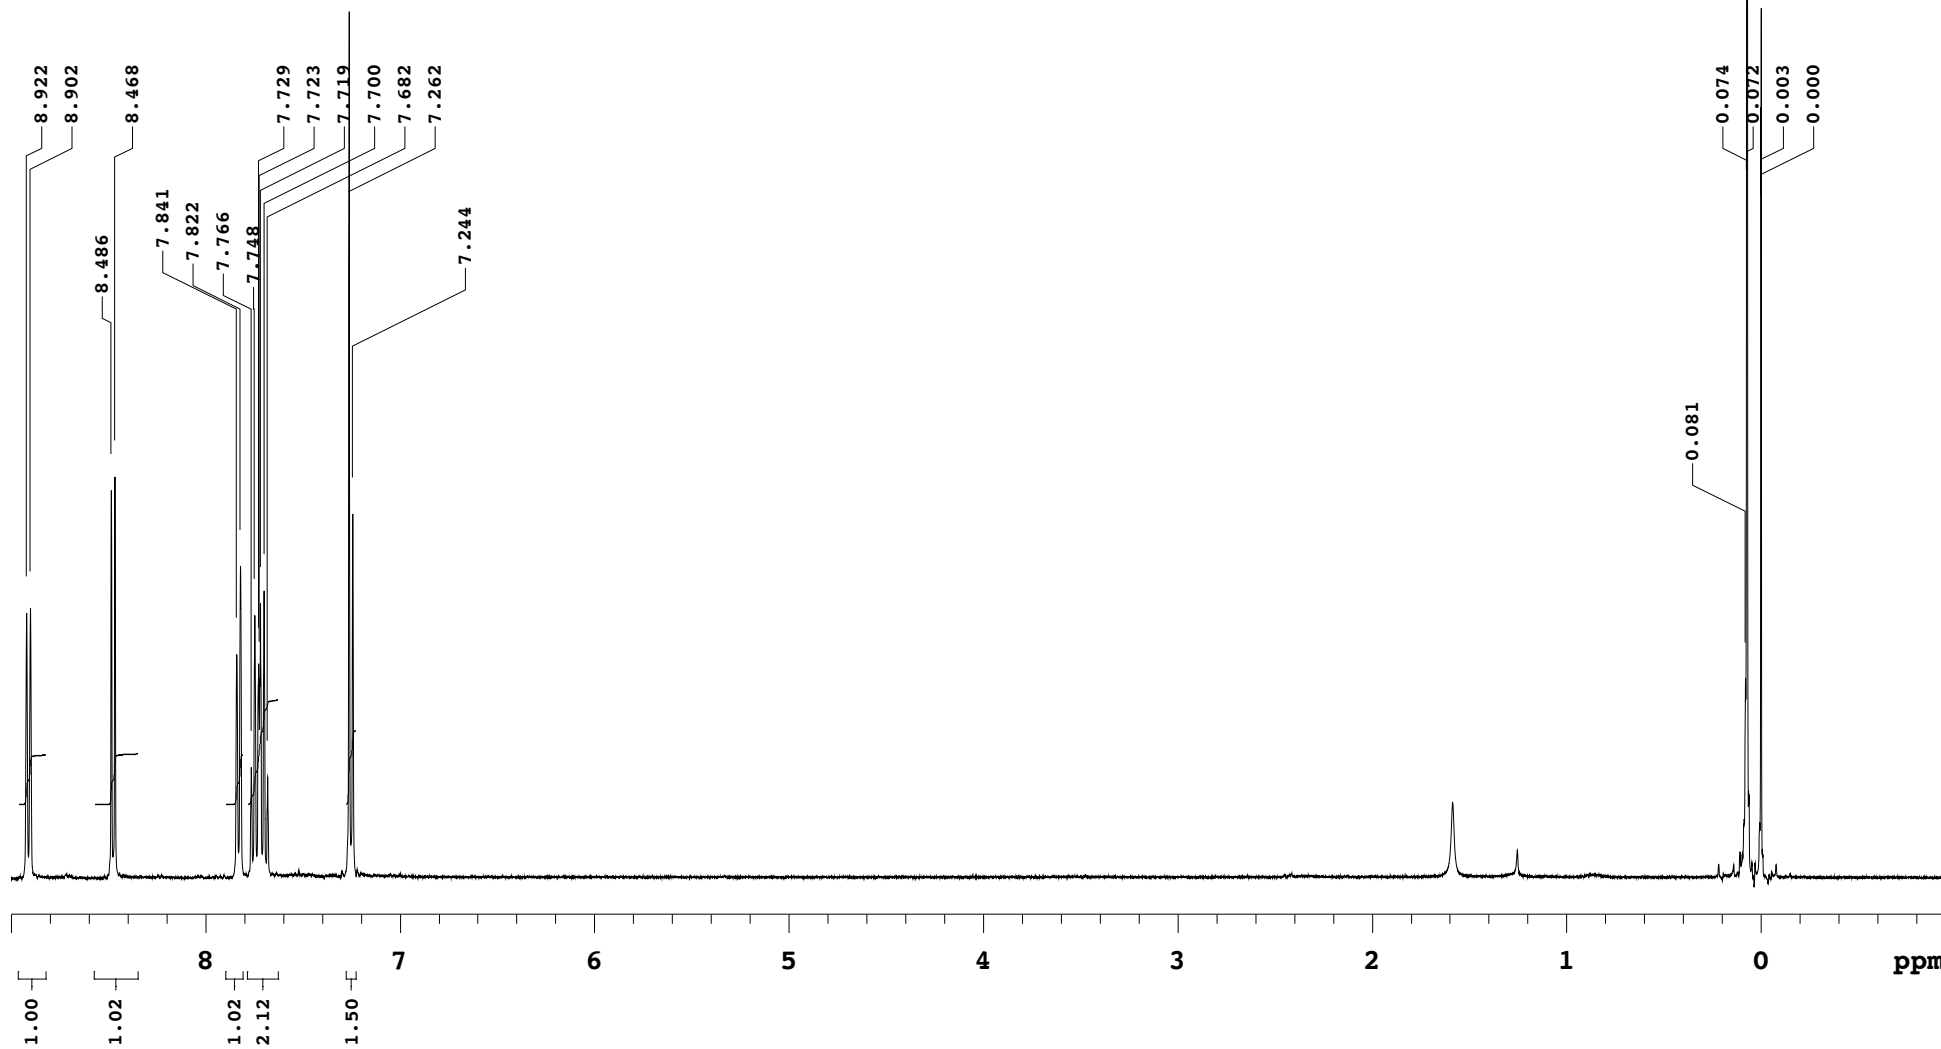



# 1-Bromo-[1,2,3]triazolo[5,1-*a*]isoquinoline (11).

<sup>13</sup>C NMR

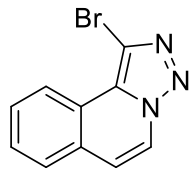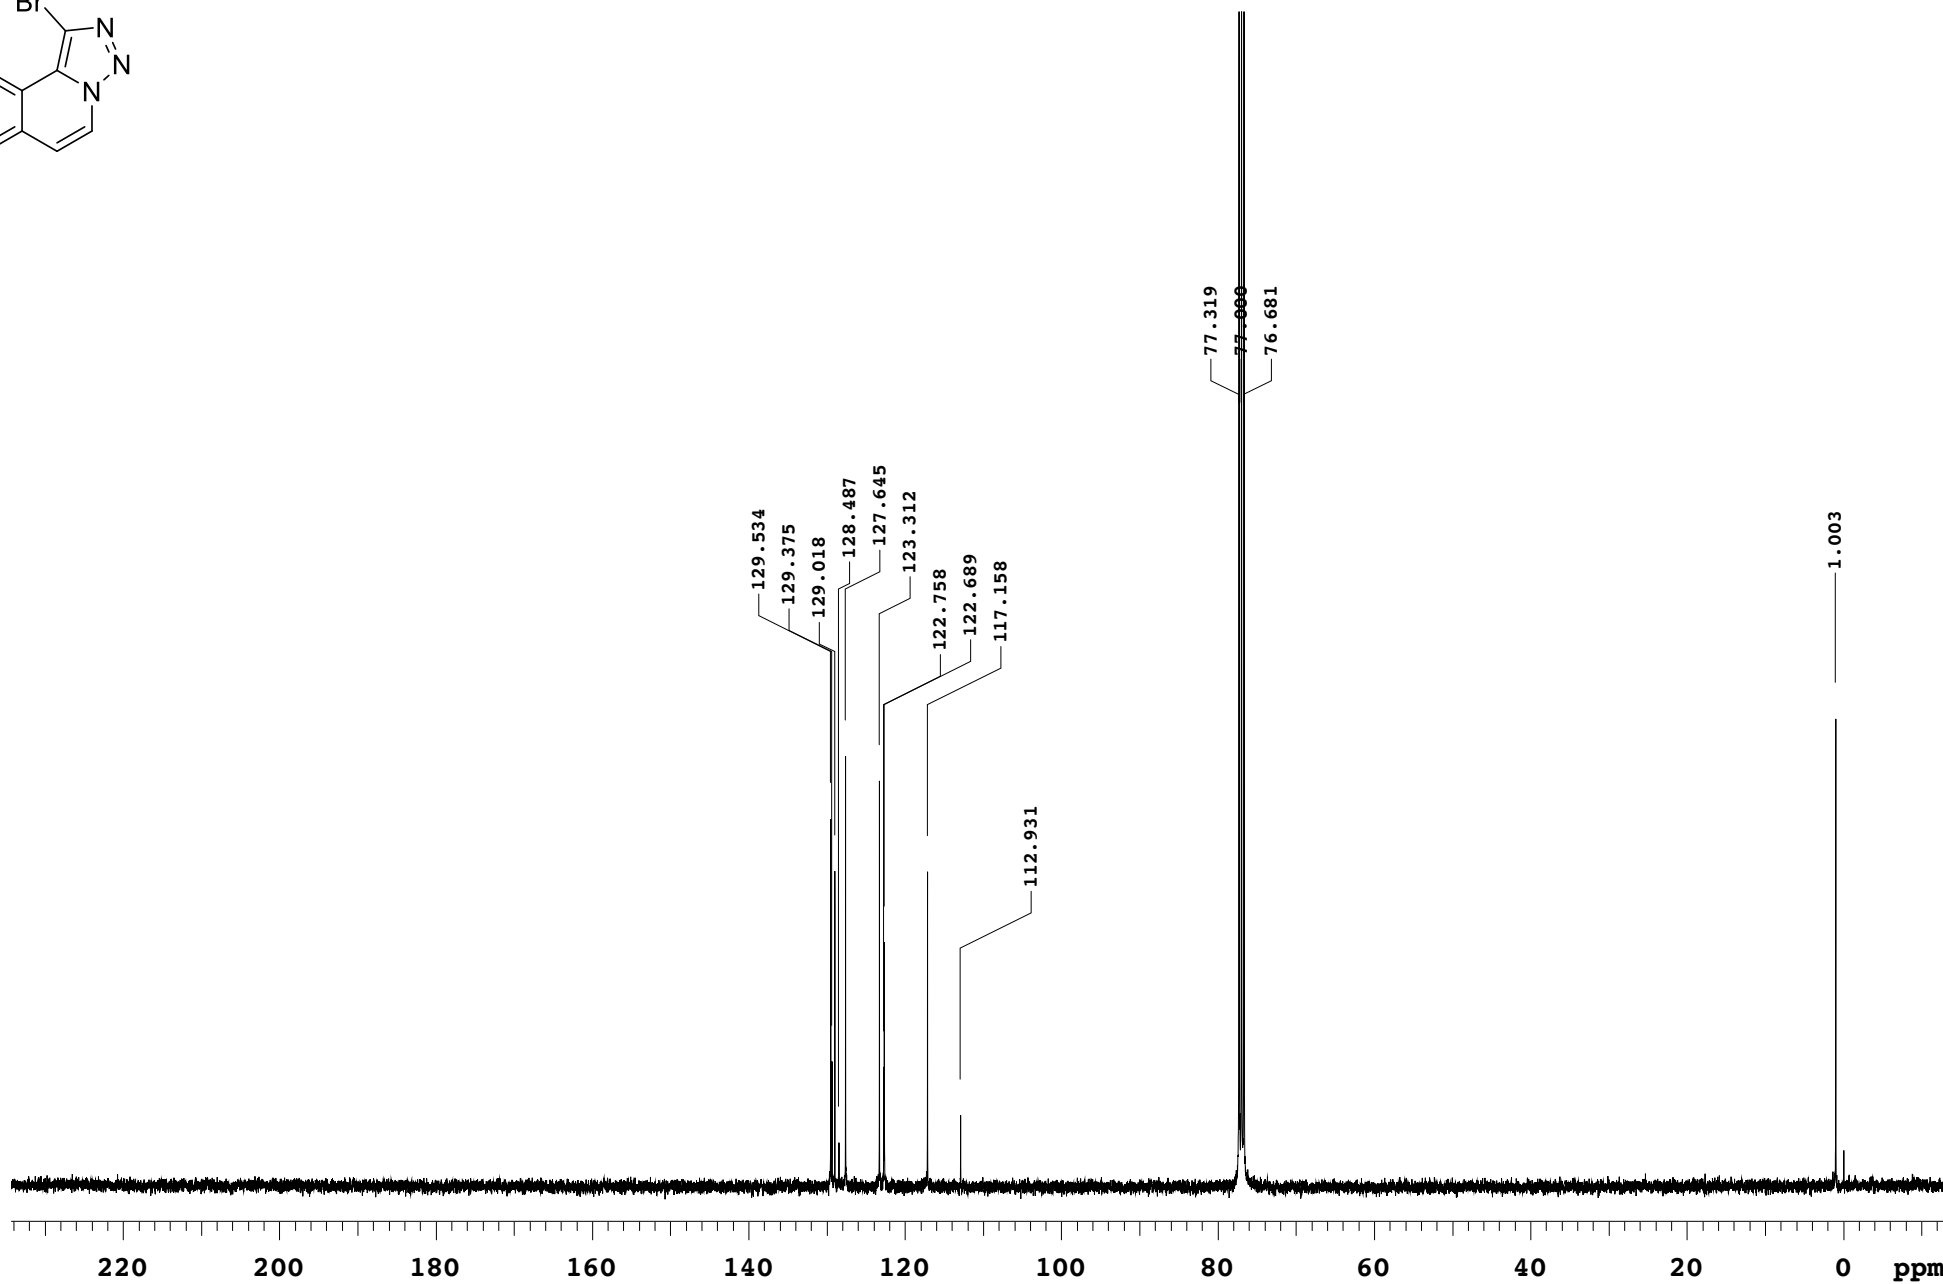

# 1-(2-Azidoethyl)-2-(2,2-dichlorovinyl)benzene (12).

<sup>1</sup>H NMR

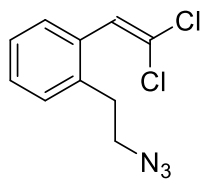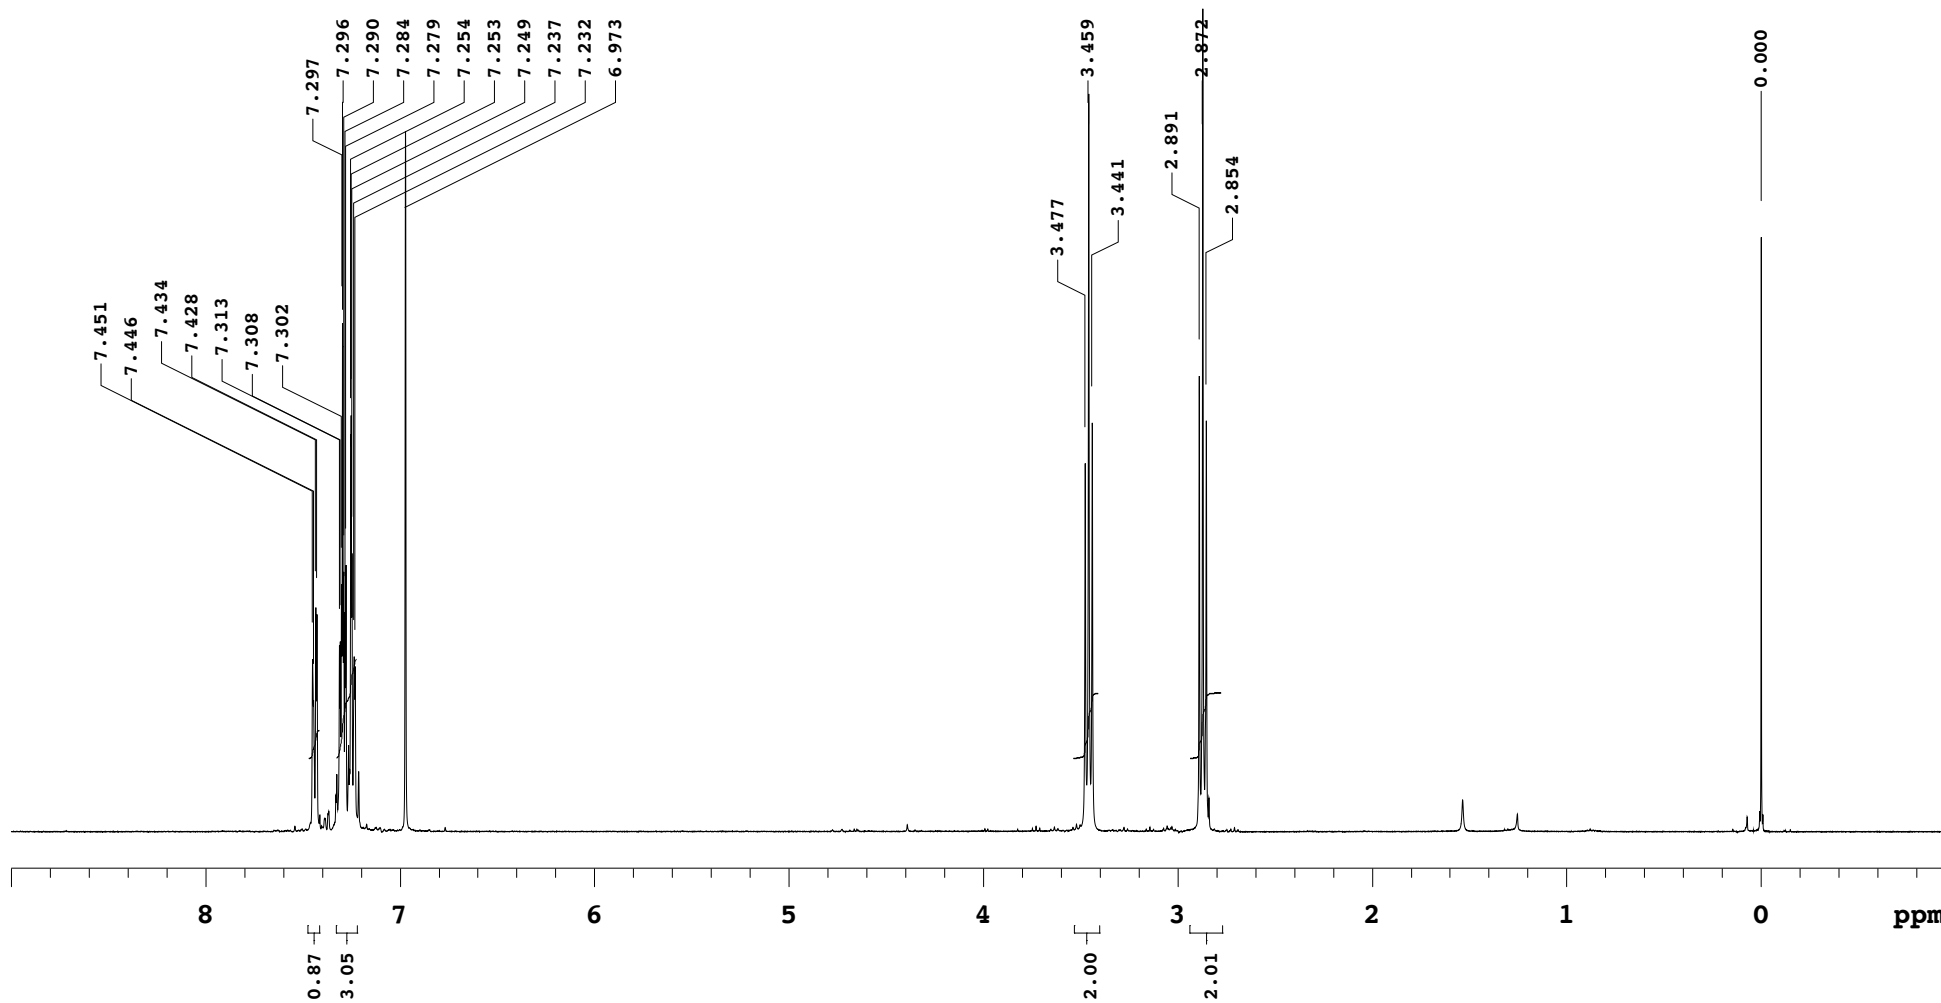

# 1-(2-Azidoethyl)-2-(2,2-dichlorovinyl)benzene (12).

<sup>13</sup>C NMR

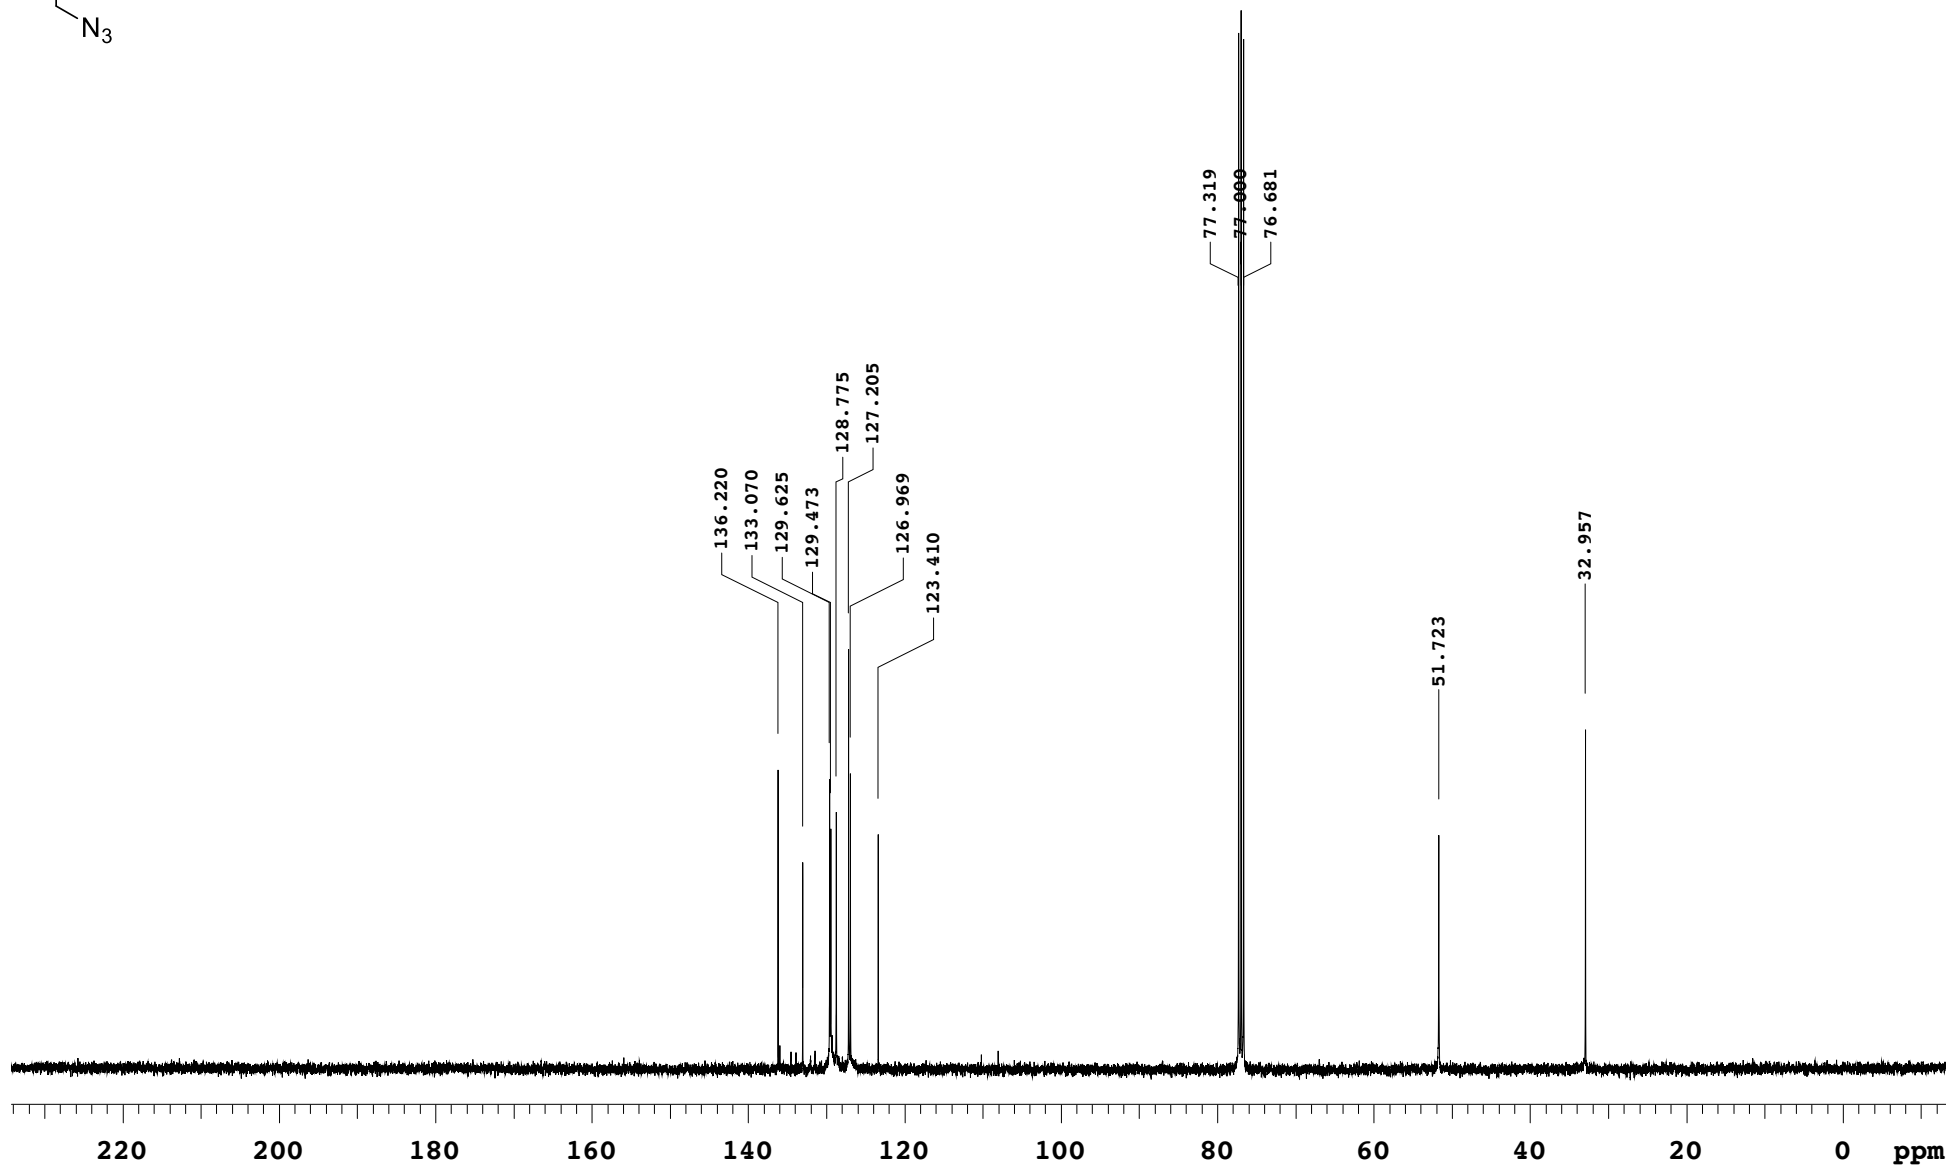

# 1-(2-Azidoethyl)-2-(2,2-diiodovinyl)benzene (13).

<sup>1</sup>H NMR

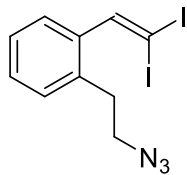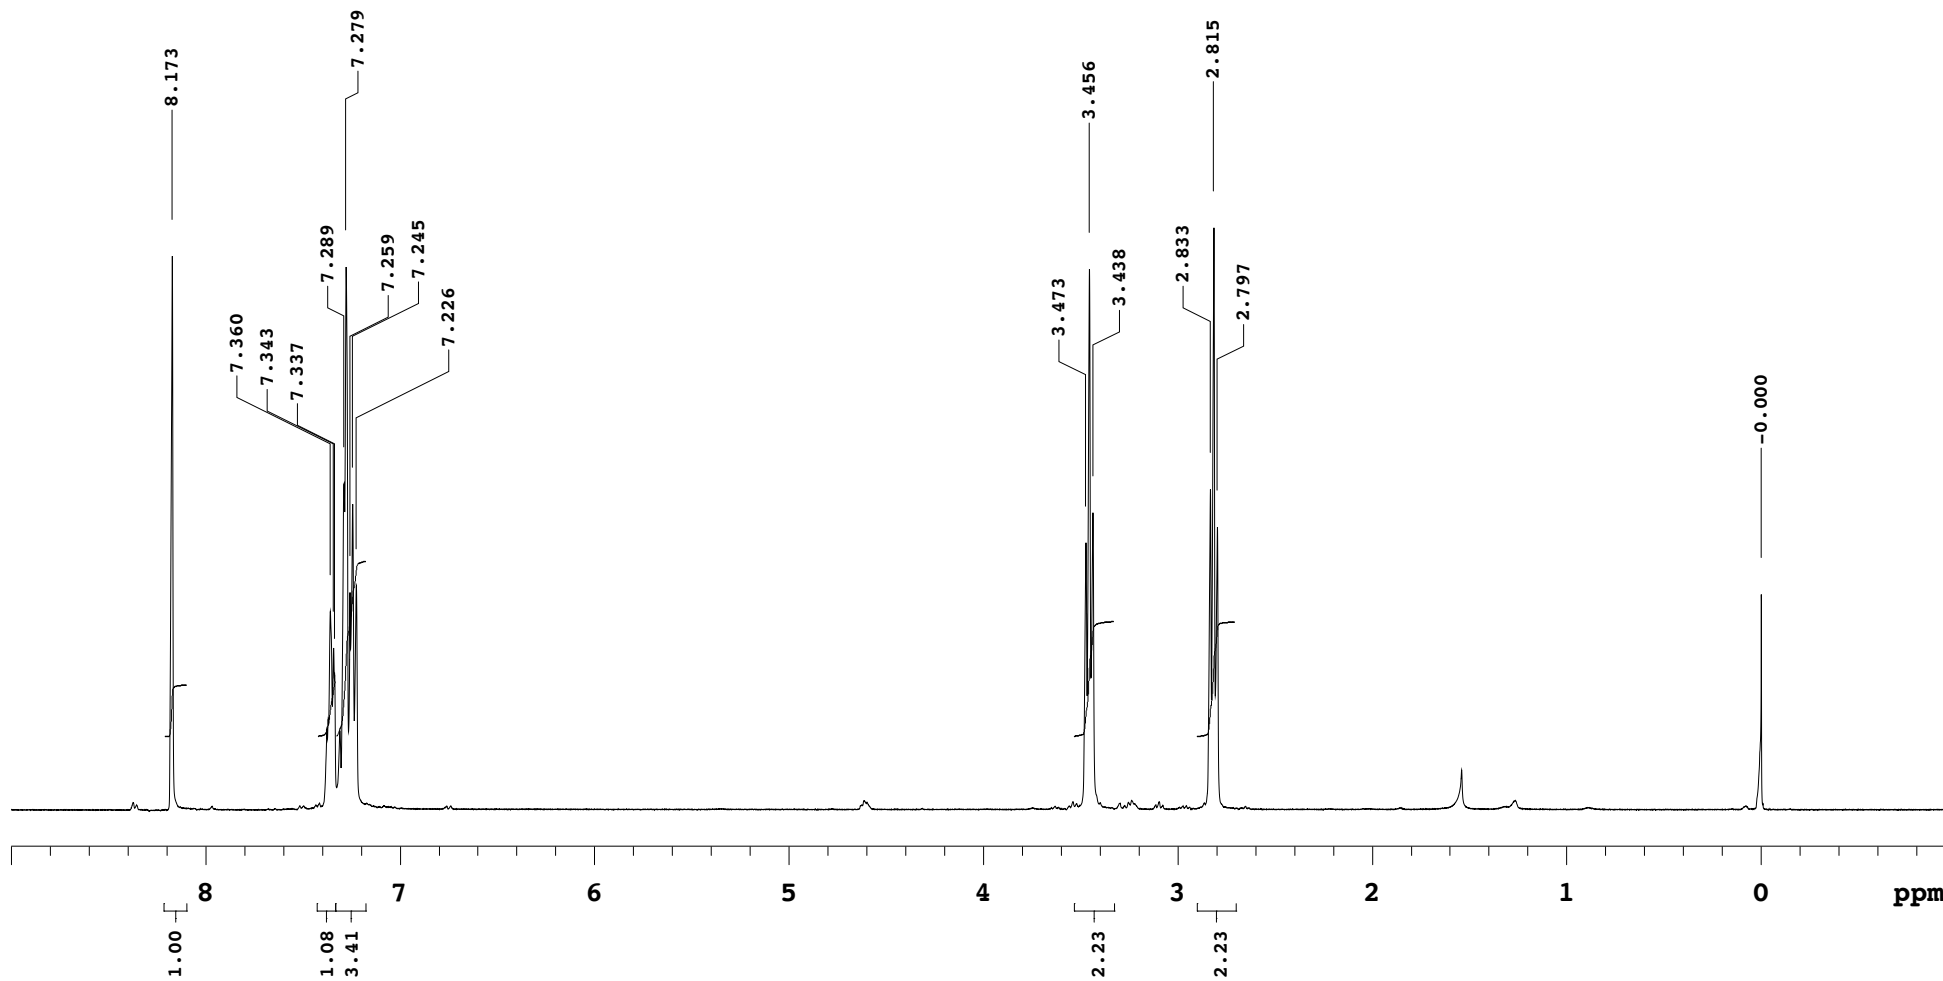

# 1-(2-Azidoethyl)-2-(2,2-diiodovinyl)benzene (13).

<sup>13</sup>C NMR

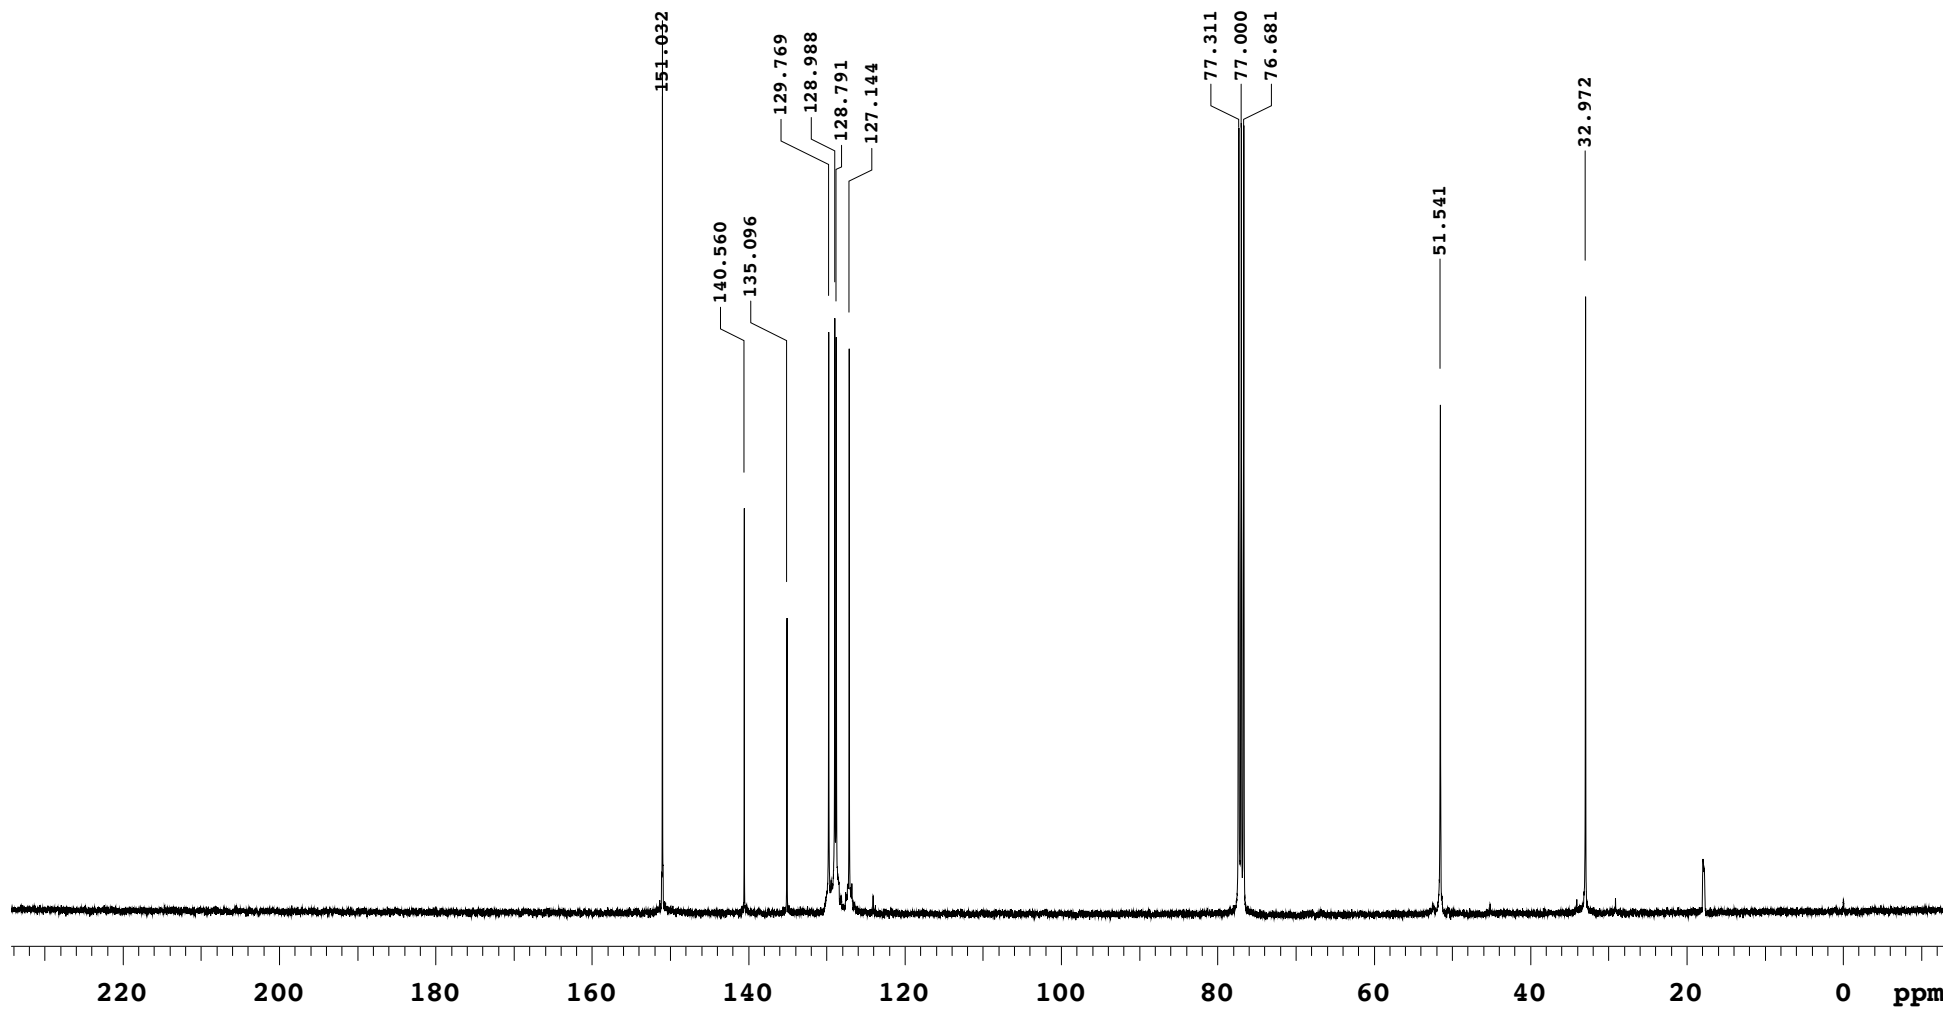

52:48 *Z/E* mixture of 1-(2-azidoethyl)-2-(2-bromo-2-fluorovinyl)benzene (14).

<sup>1</sup>H NMR

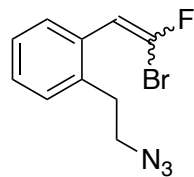

7.384  
7.379  
7.292  
7.286  
7.274  
7.271  
7.263  
7.257  
7.248  
7.242  
7.222

6.709  
6.678

6.191  
6.113

3.482  
3.464  
3.447  
3.429

2.912  
2.894  
2.877  
2.860  
2.841

— 0.000

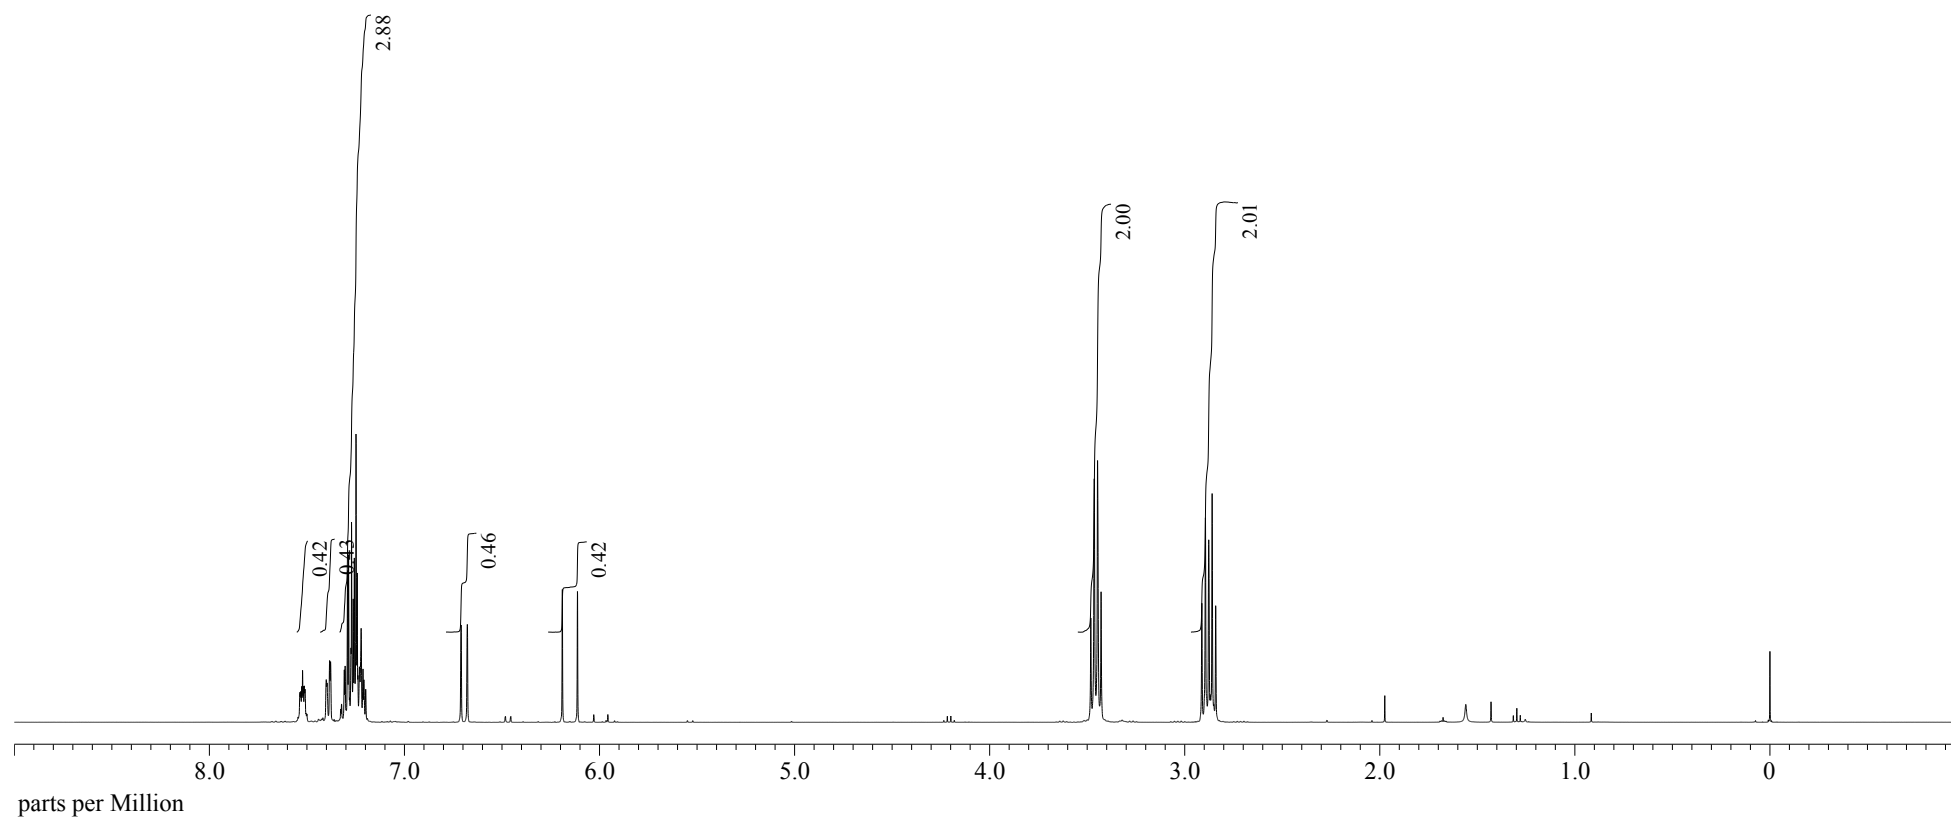

52:48 *Z/E* mixture of 1-(2-azidoethyl)-2-(2-bromo-2-fluorovinyl)benzene (14).

<sup>13</sup>C NMR

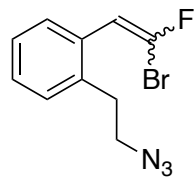

136.600  
135.321  
135.311  
129.892  
129.858  
129.834  
129.604  
129.465  
129.384  
128.584  
128.325  
128.316  
127.261  
127.051

110.151  
110.075  
109.878  
109.663

77.316  
77.000  
76.684

51.711  
51.601

33.010  
32.905

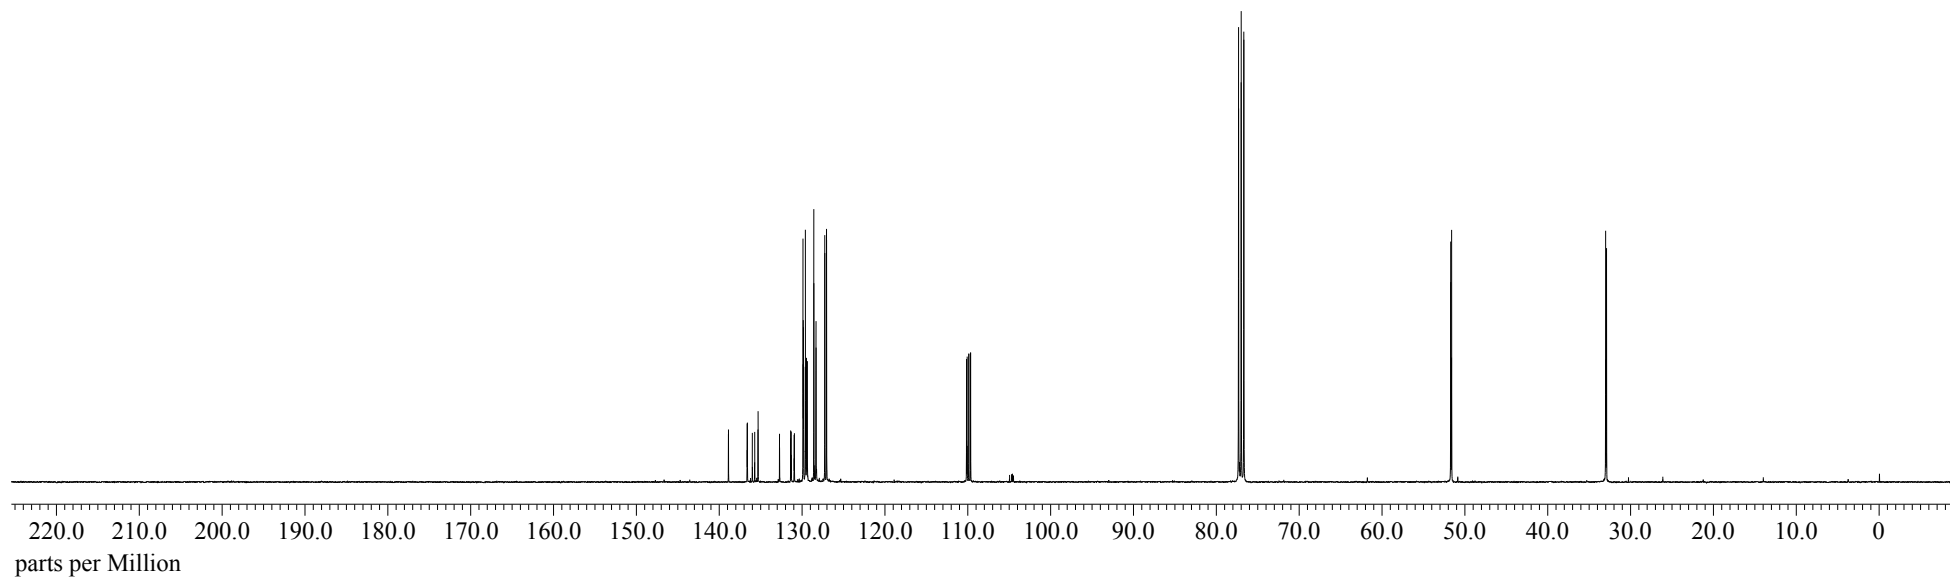

52:48 *Z/E* mixture of 1-(2-azidoethyl)-2-(2-bromo-2-fluorovinyl)benzene (14).

<sup>19</sup>F NMR

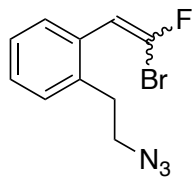

-68.987  
-69.021  
-72.046  
-72.129

-164.900

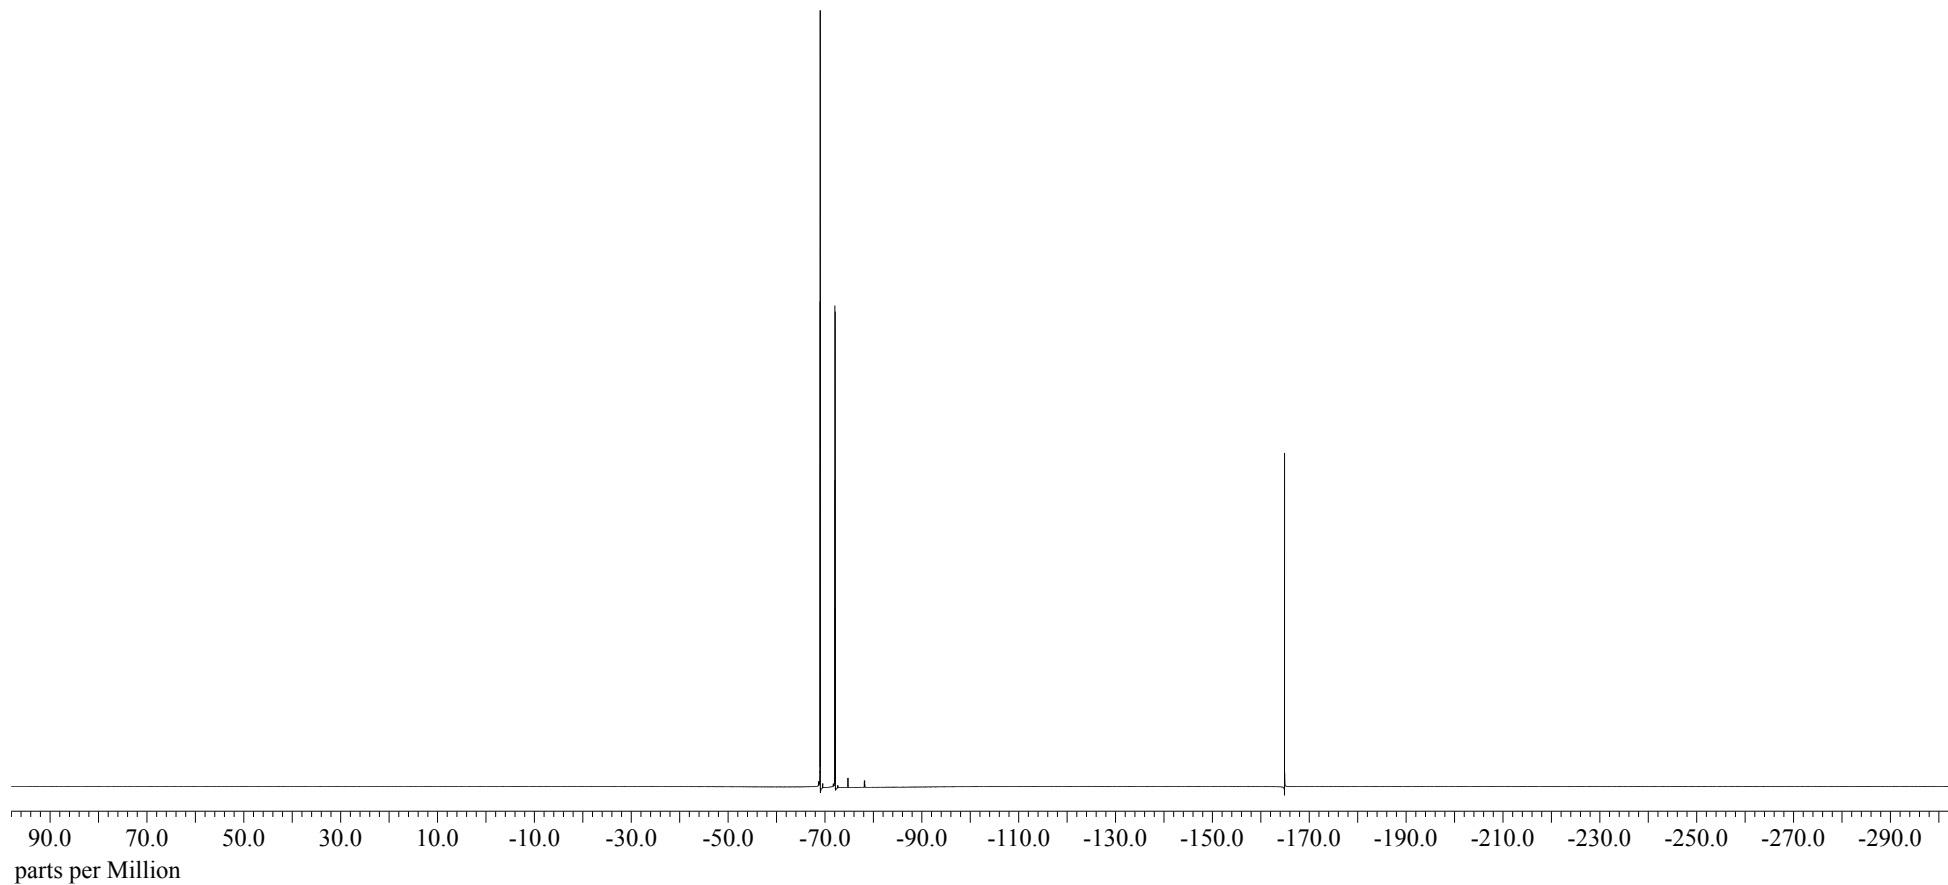



# 1-(2-Azidoethyl)-4-chloro-2-(2,2-dibromovinyl)benzene (15).

<sup>1</sup>H NMR

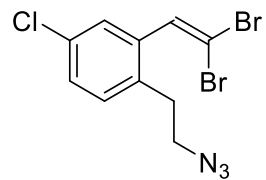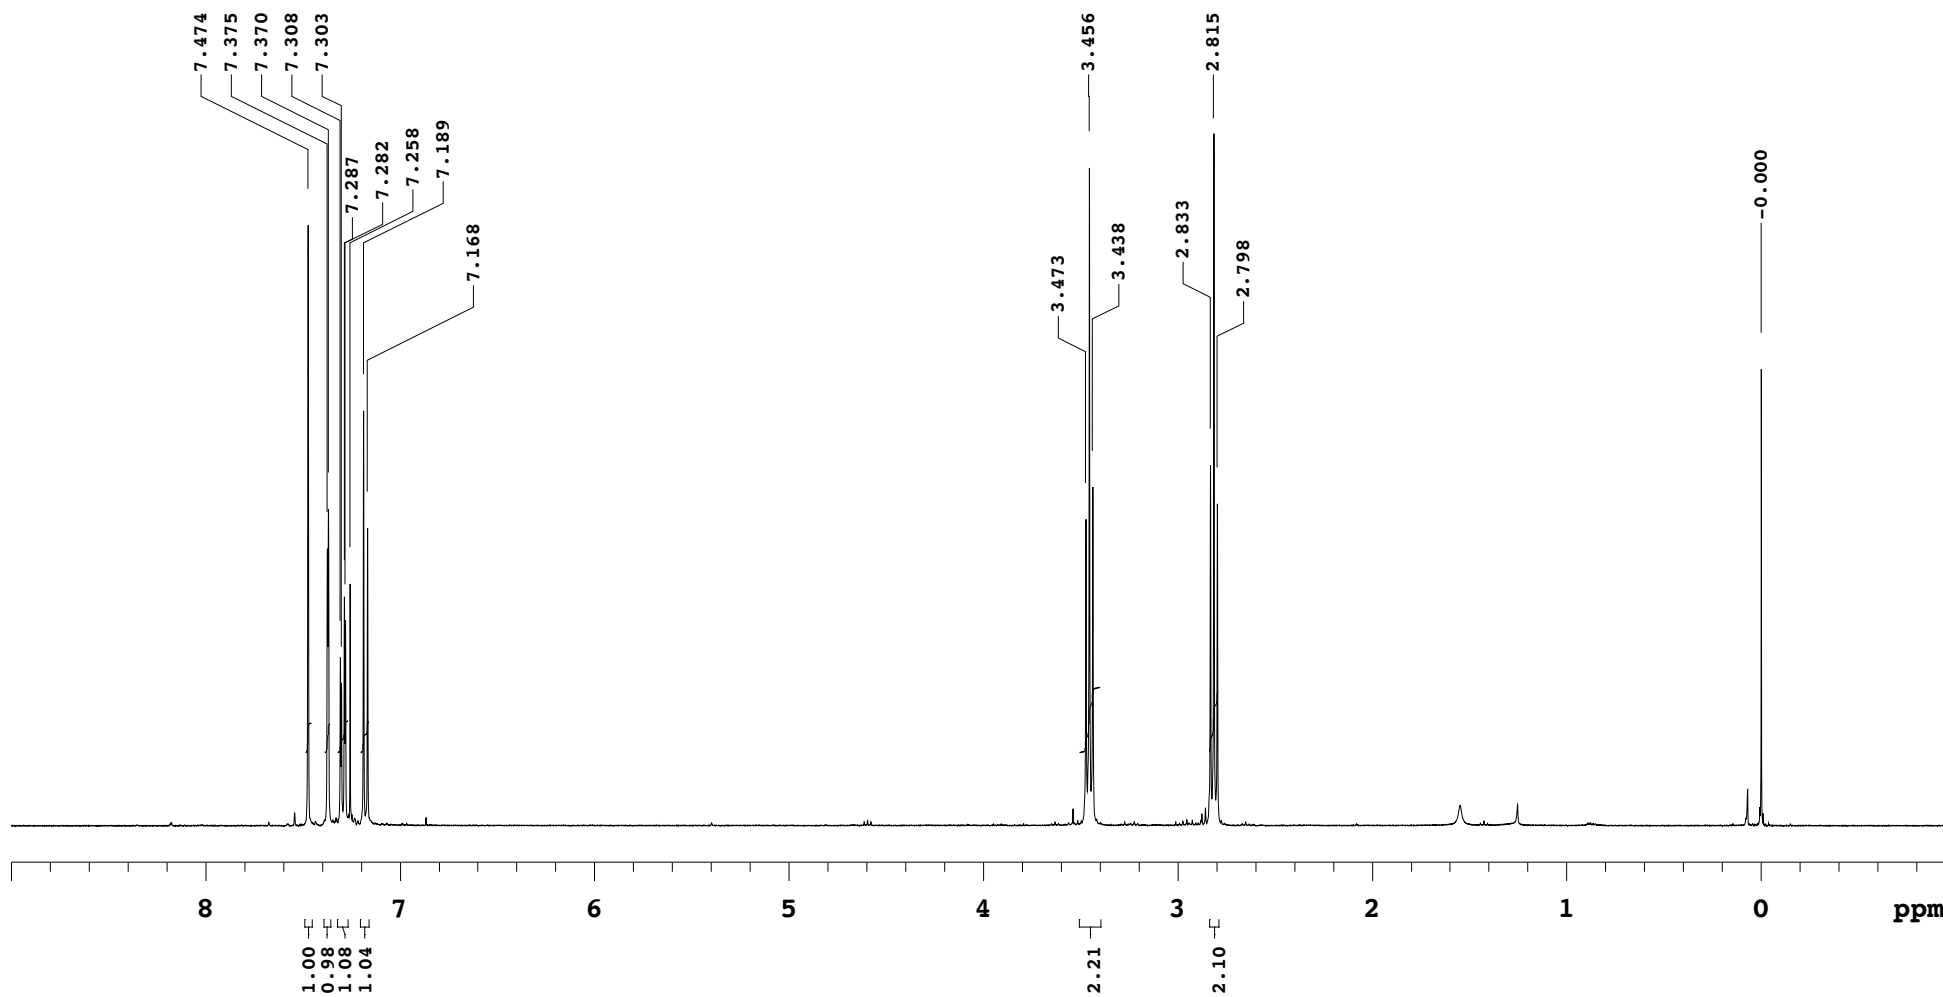

# 1-(2-Azidoethyl)-4-chloro-2-(2,2-dibromovinyl)benzene (15).

<sup>13</sup>C NMR

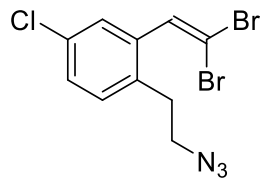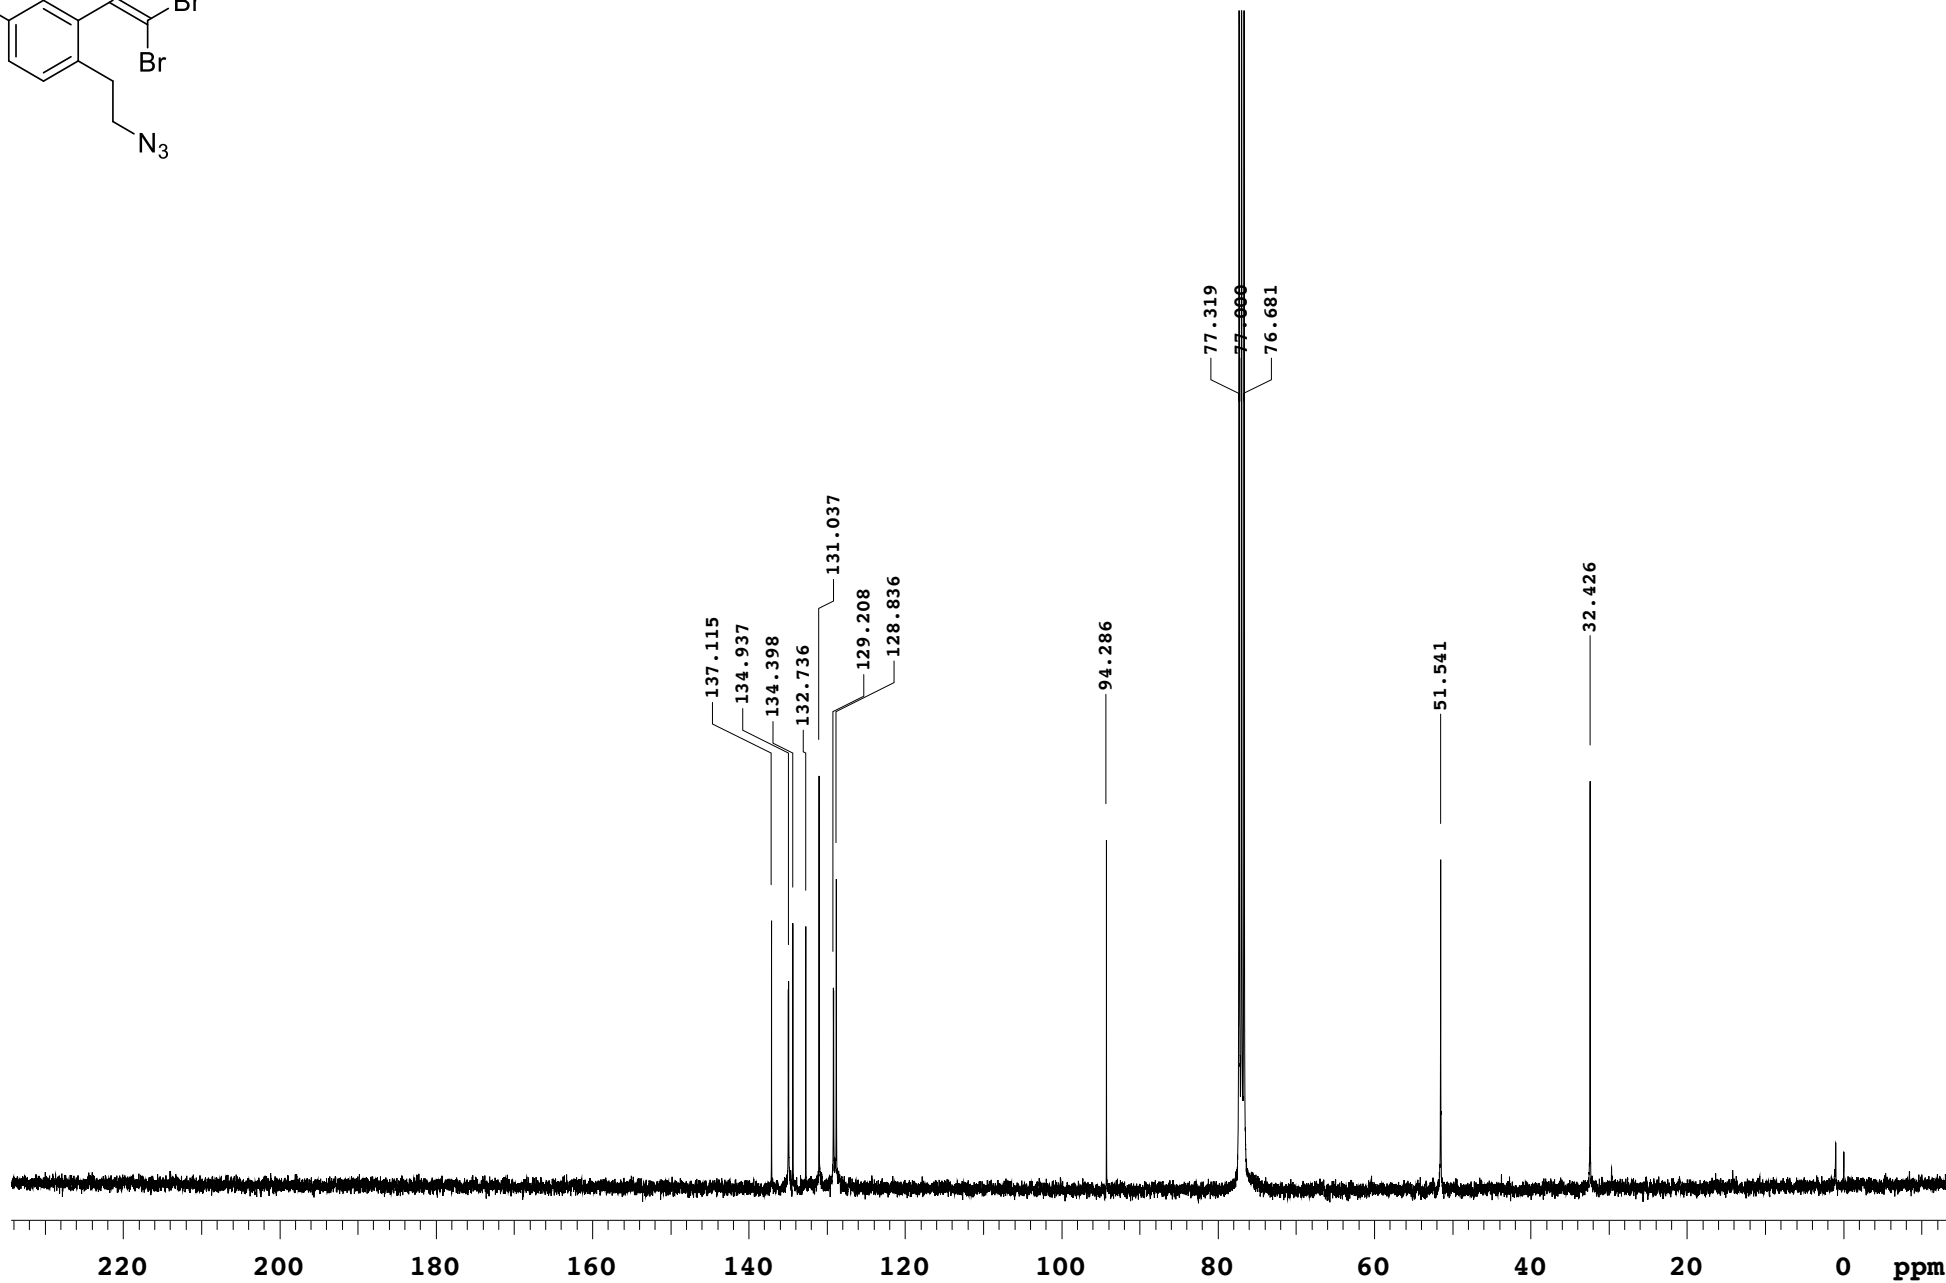

# Azidomethyl 2-(2,2-dibromovinyl)phenyl sulfide (16).

<sup>1</sup>H NMR

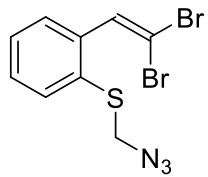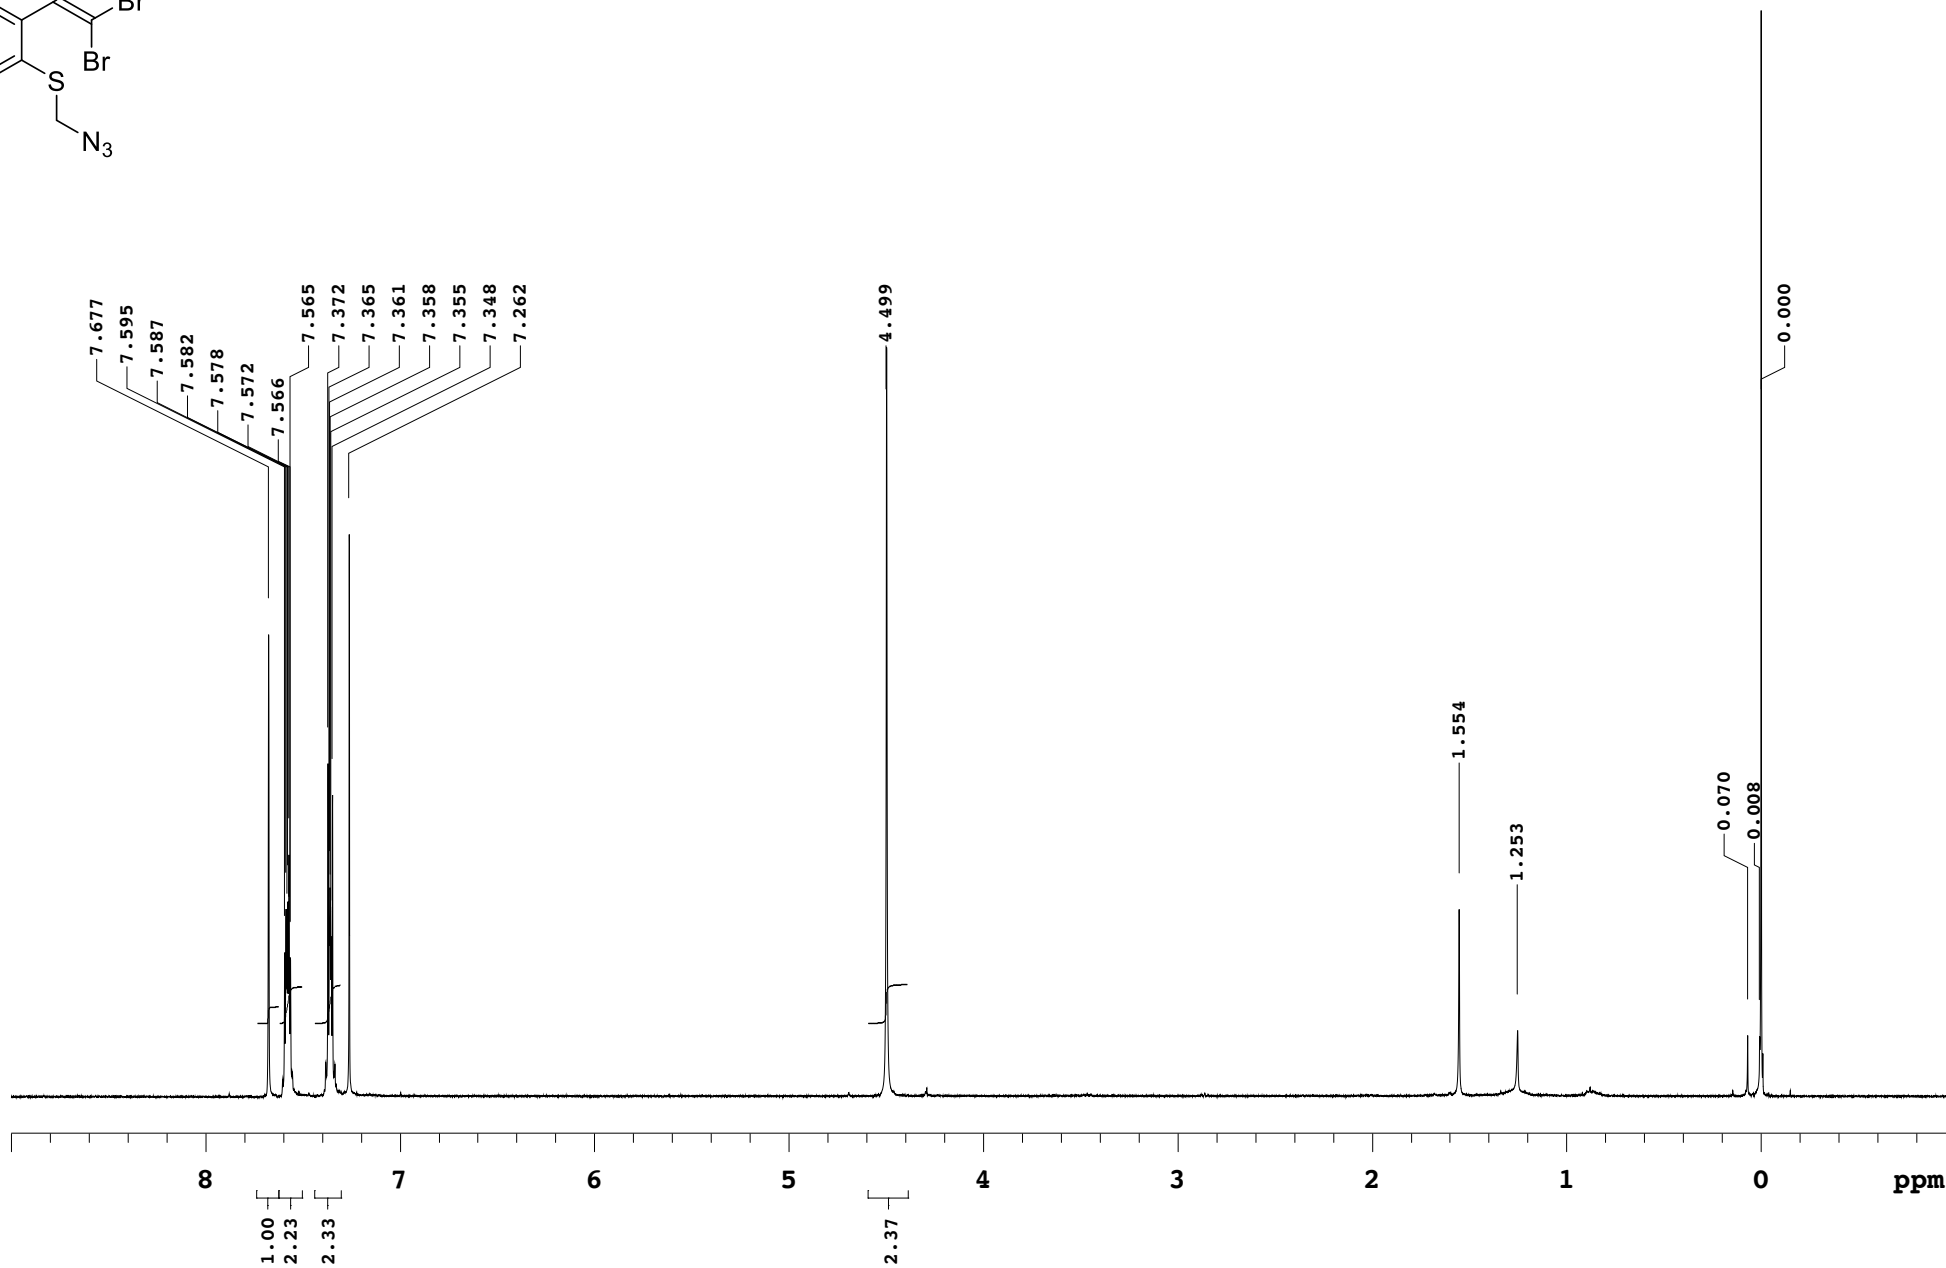

# Azidomethyl 2-(2,2-dibromovinyl)phenyl sulfide (16).

<sup>13</sup>C NMR

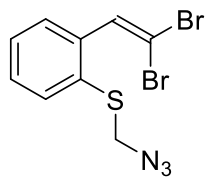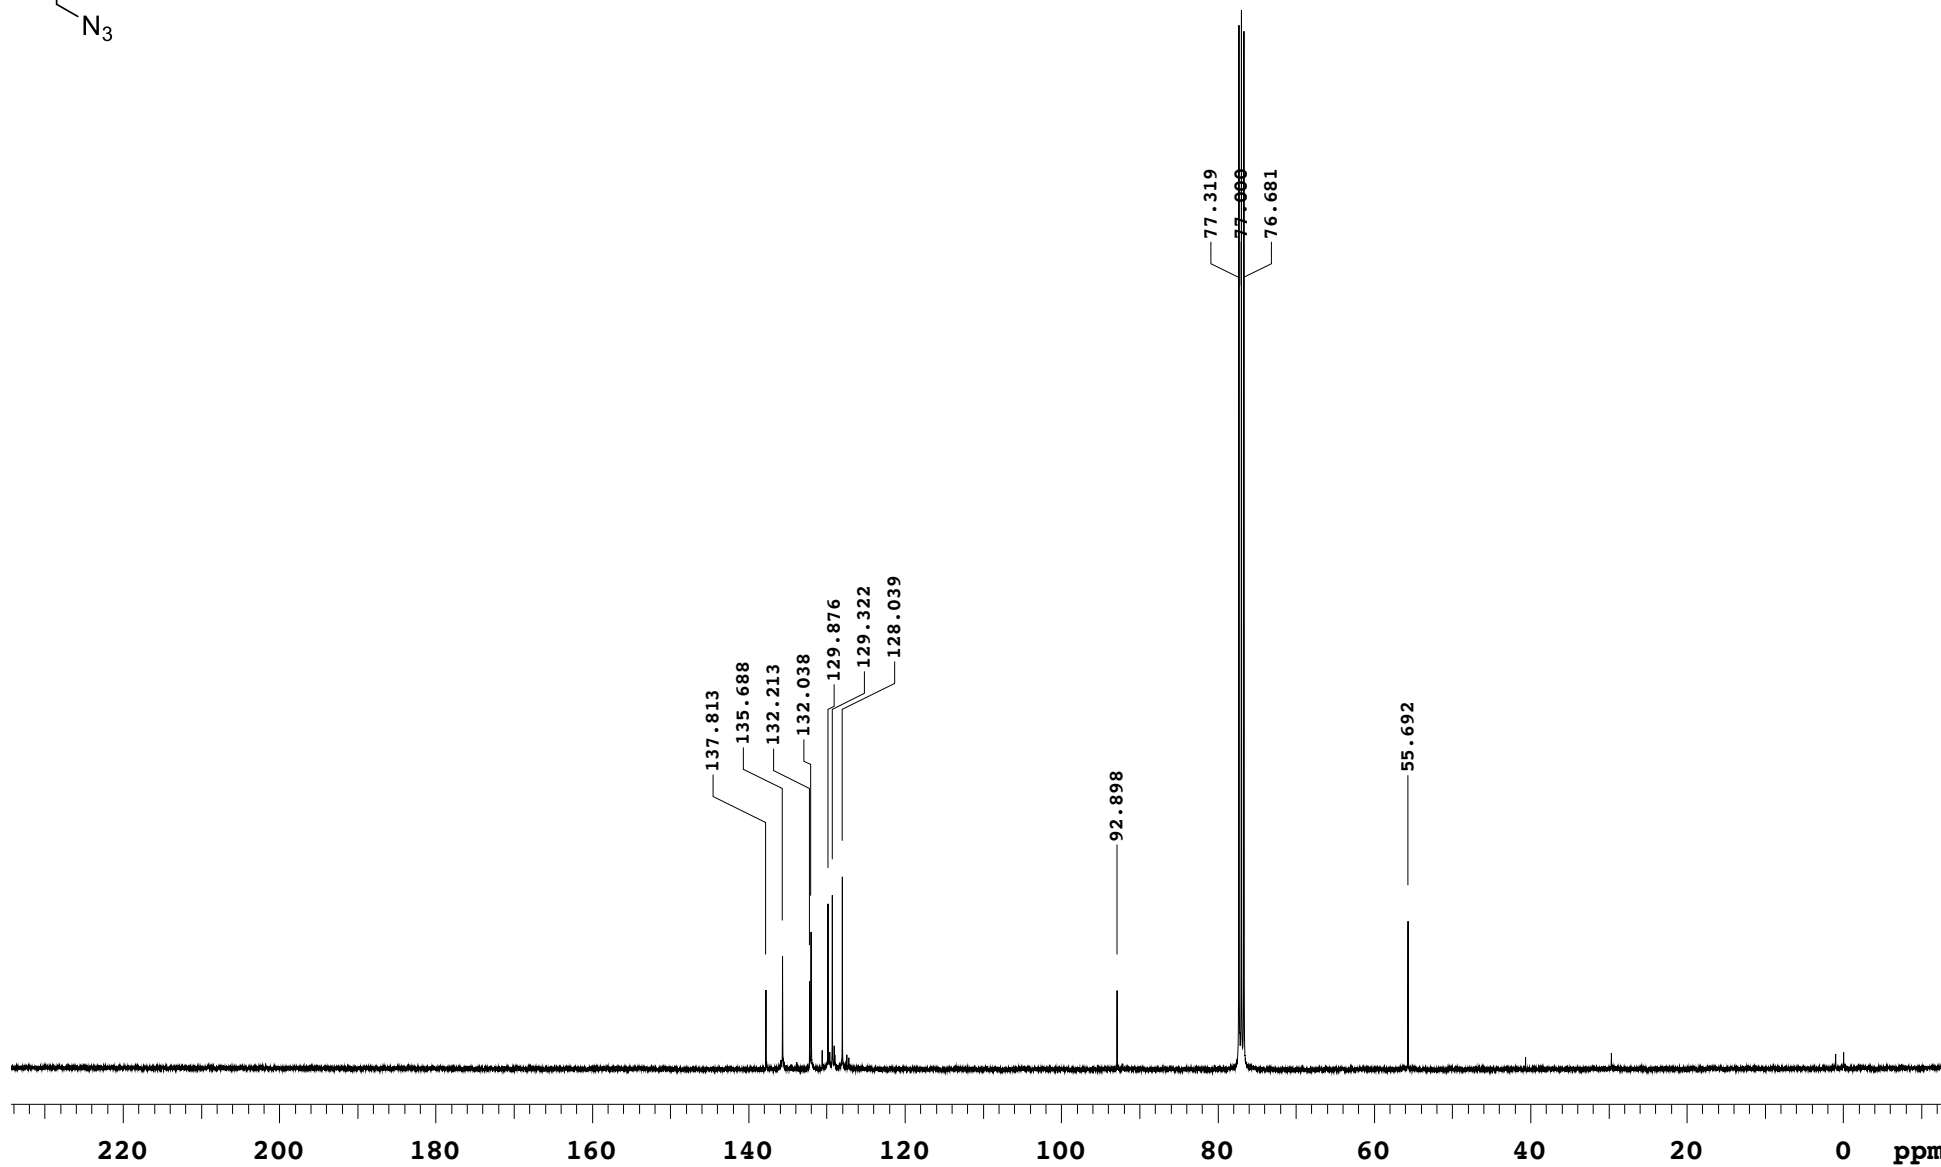

# 1-(Azidomethyl)-2-(2,2-dibromovinyl)benzene (17).

<sup>1</sup>H NMR

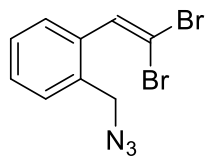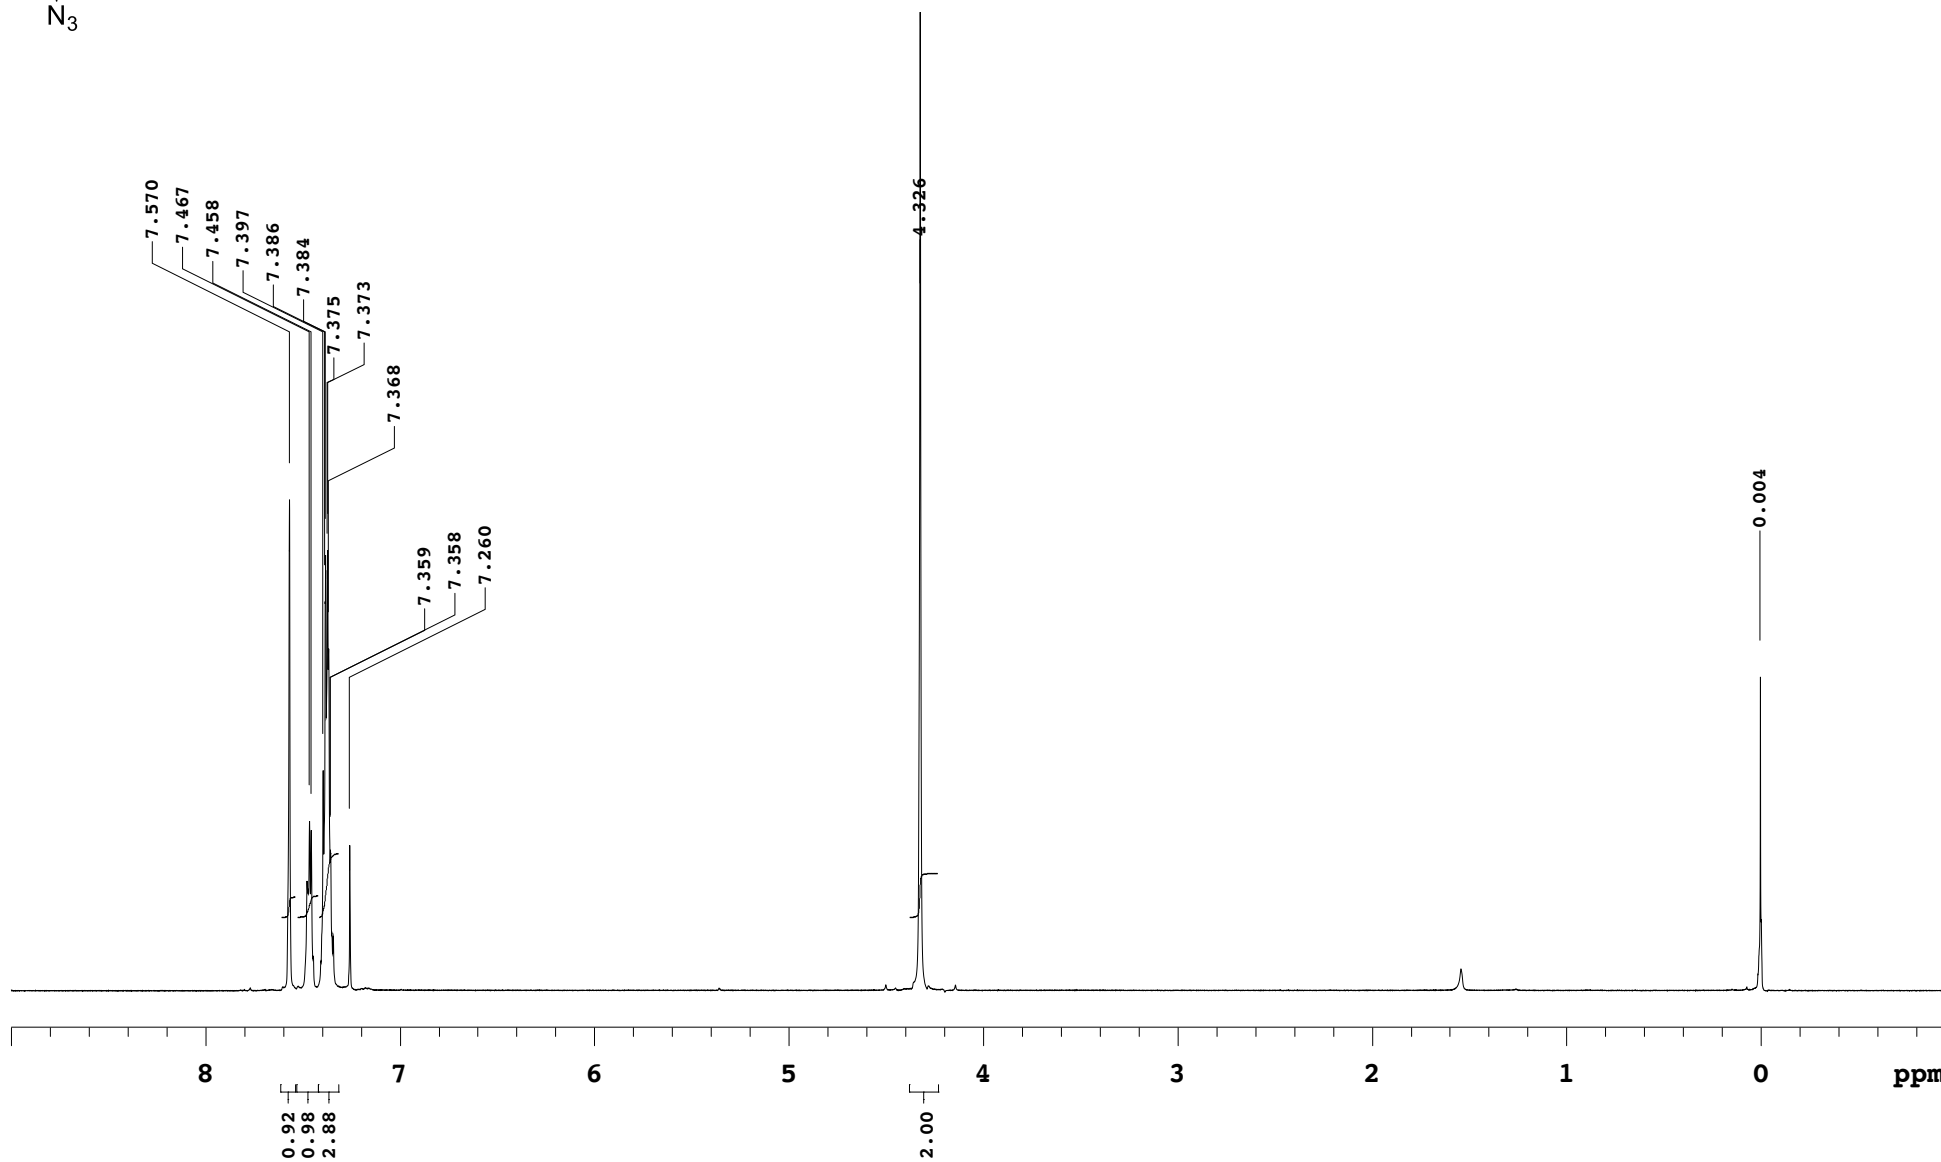

# 1-(Azidomethyl)-2-(2,2-dibromovinyl)benzene (17).

<sup>13</sup>C NMR

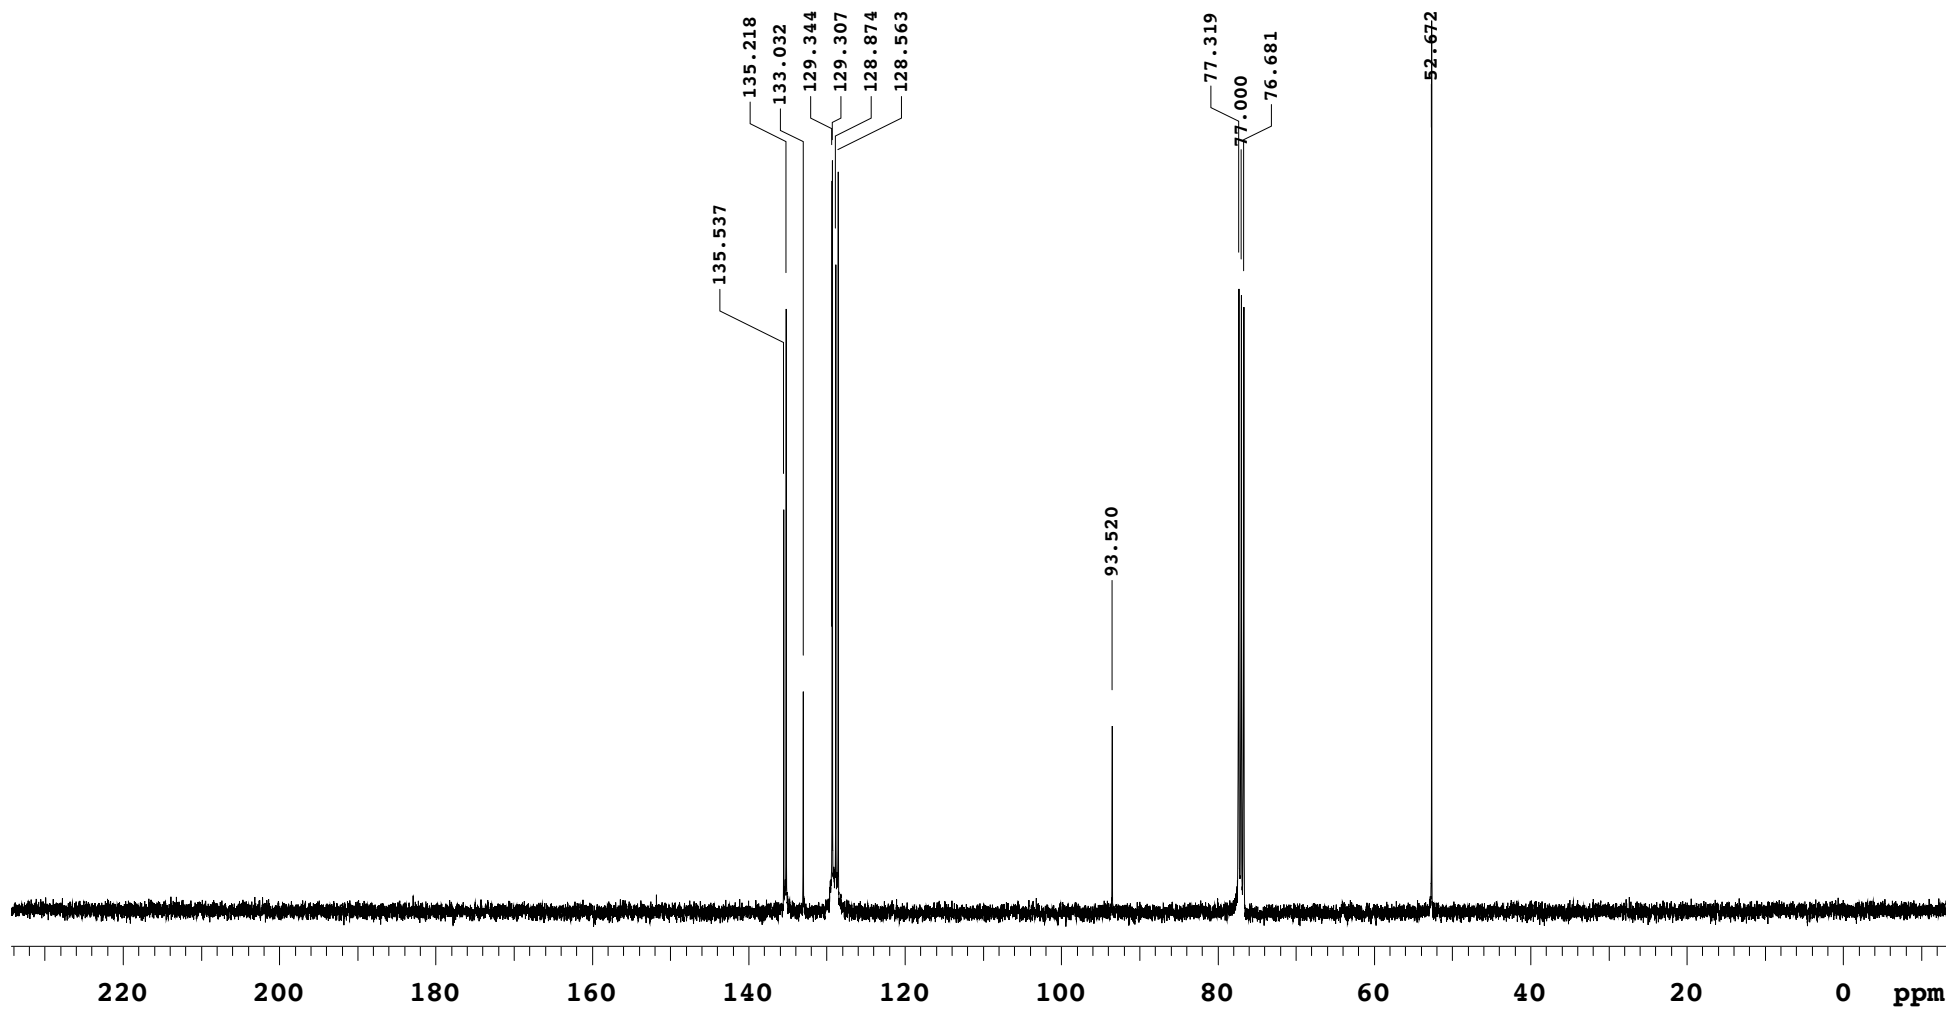

# 1-(3-Azidopropyl)-2-(2,2-dibromovinyl)benzene (18).

<sup>1</sup>H NMR

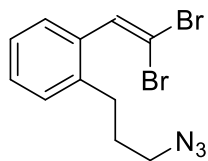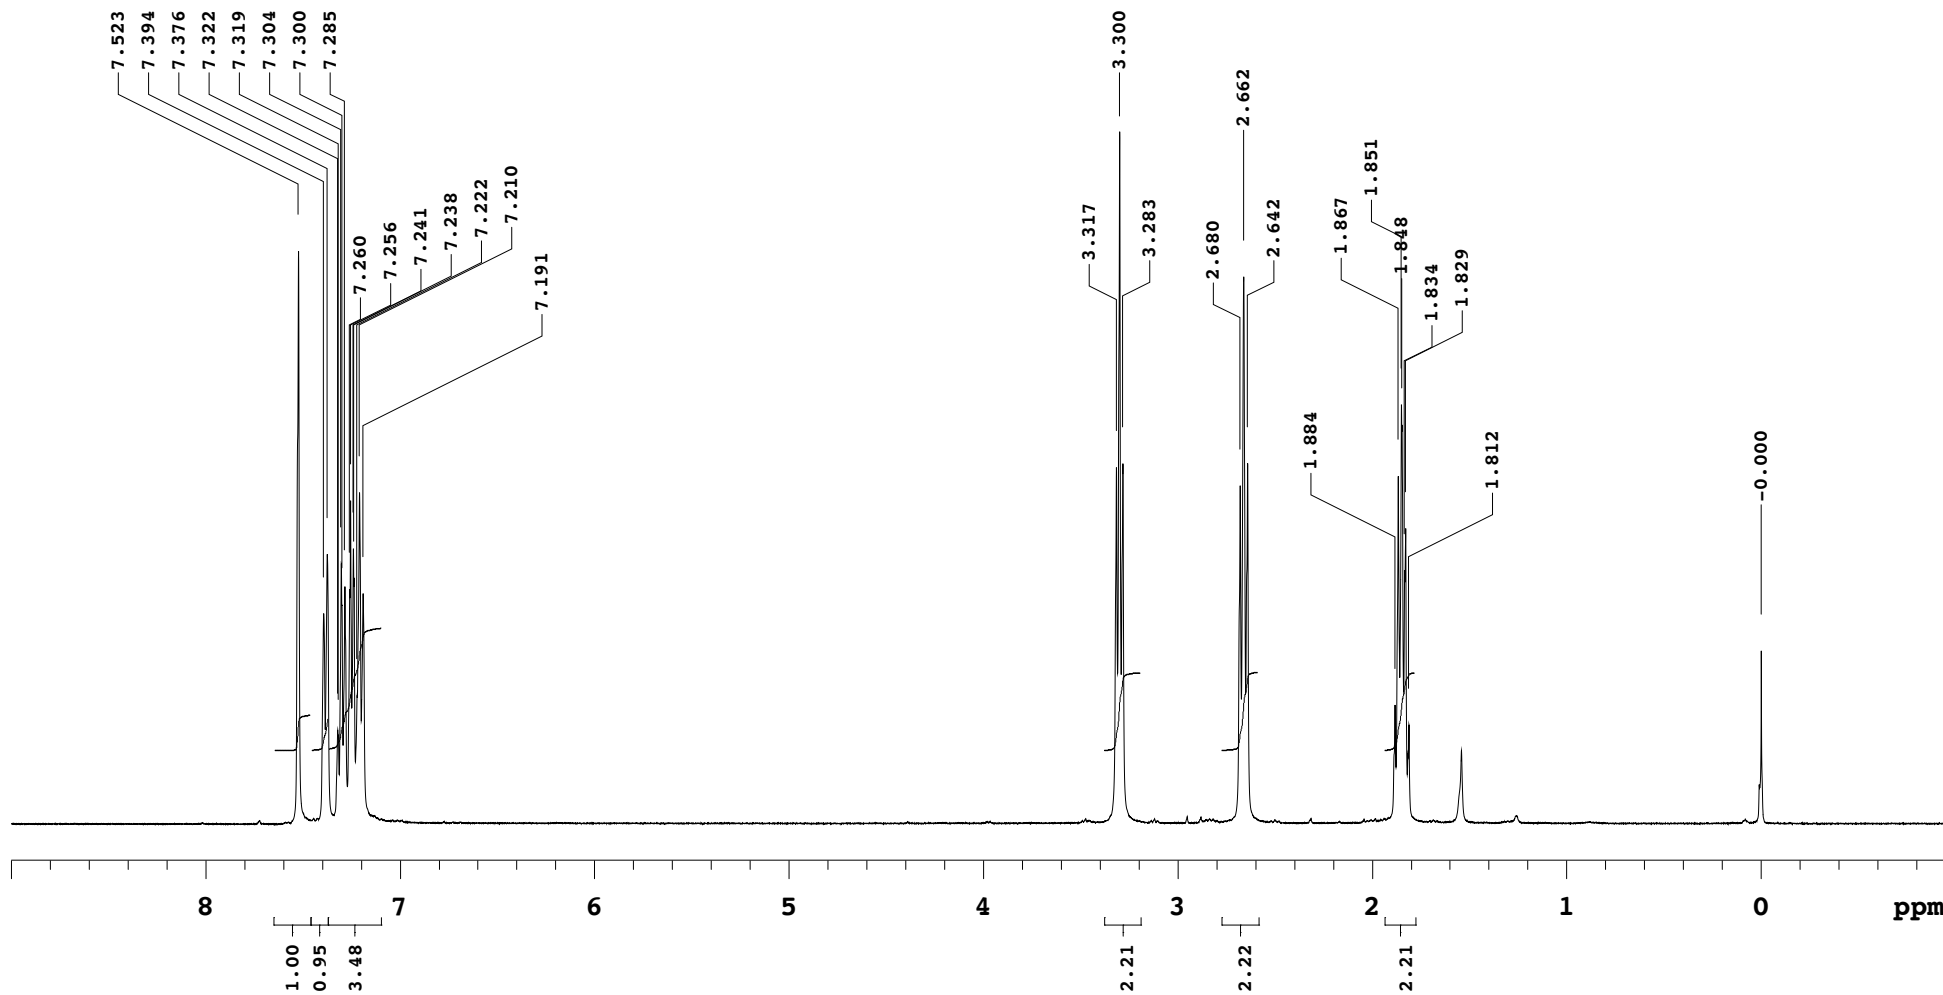

# 1-(3-Azidopropyl)-2-(2,2-dibromovinyl)benzene (18).

<sup>13</sup>C NMR

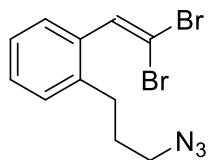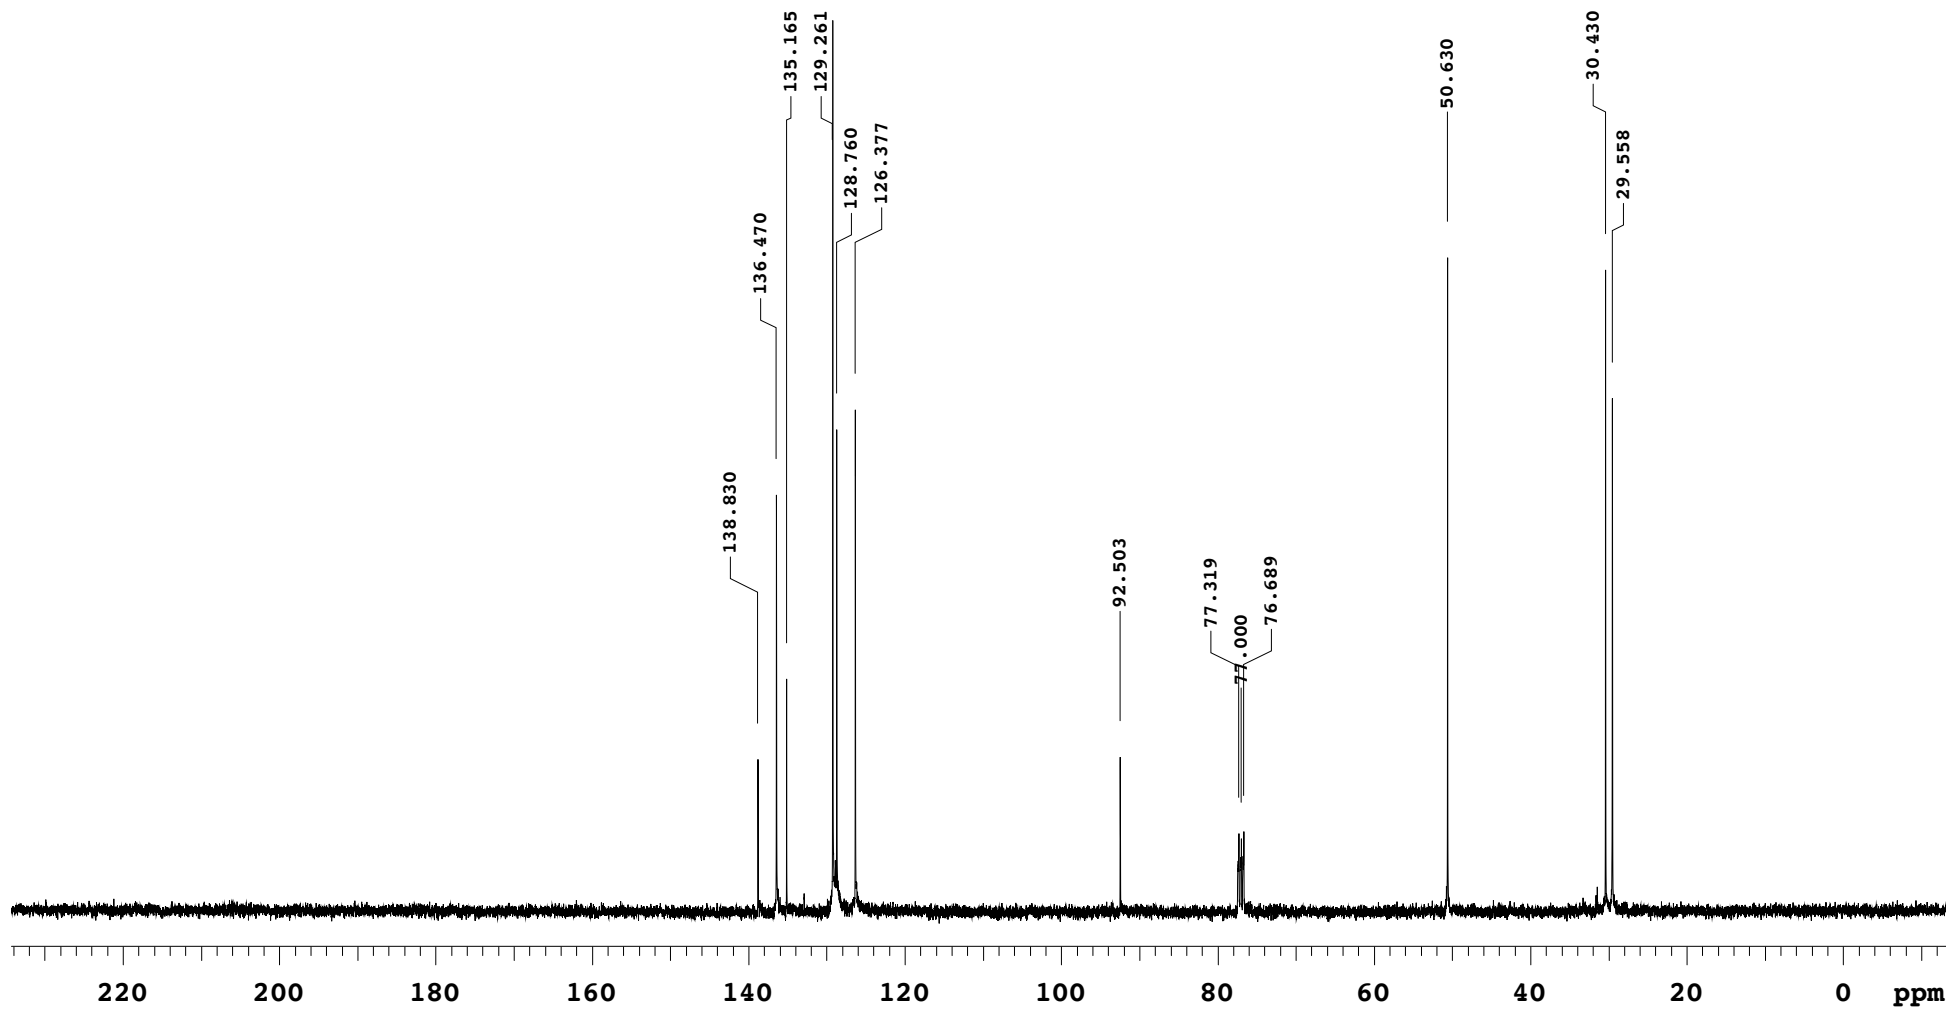



# 1-(2-Azidoethoxy)-2-(2,2-dibromovinyl)benzene (19).

<sup>1</sup>H NMR

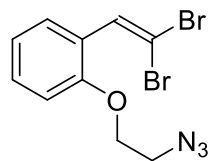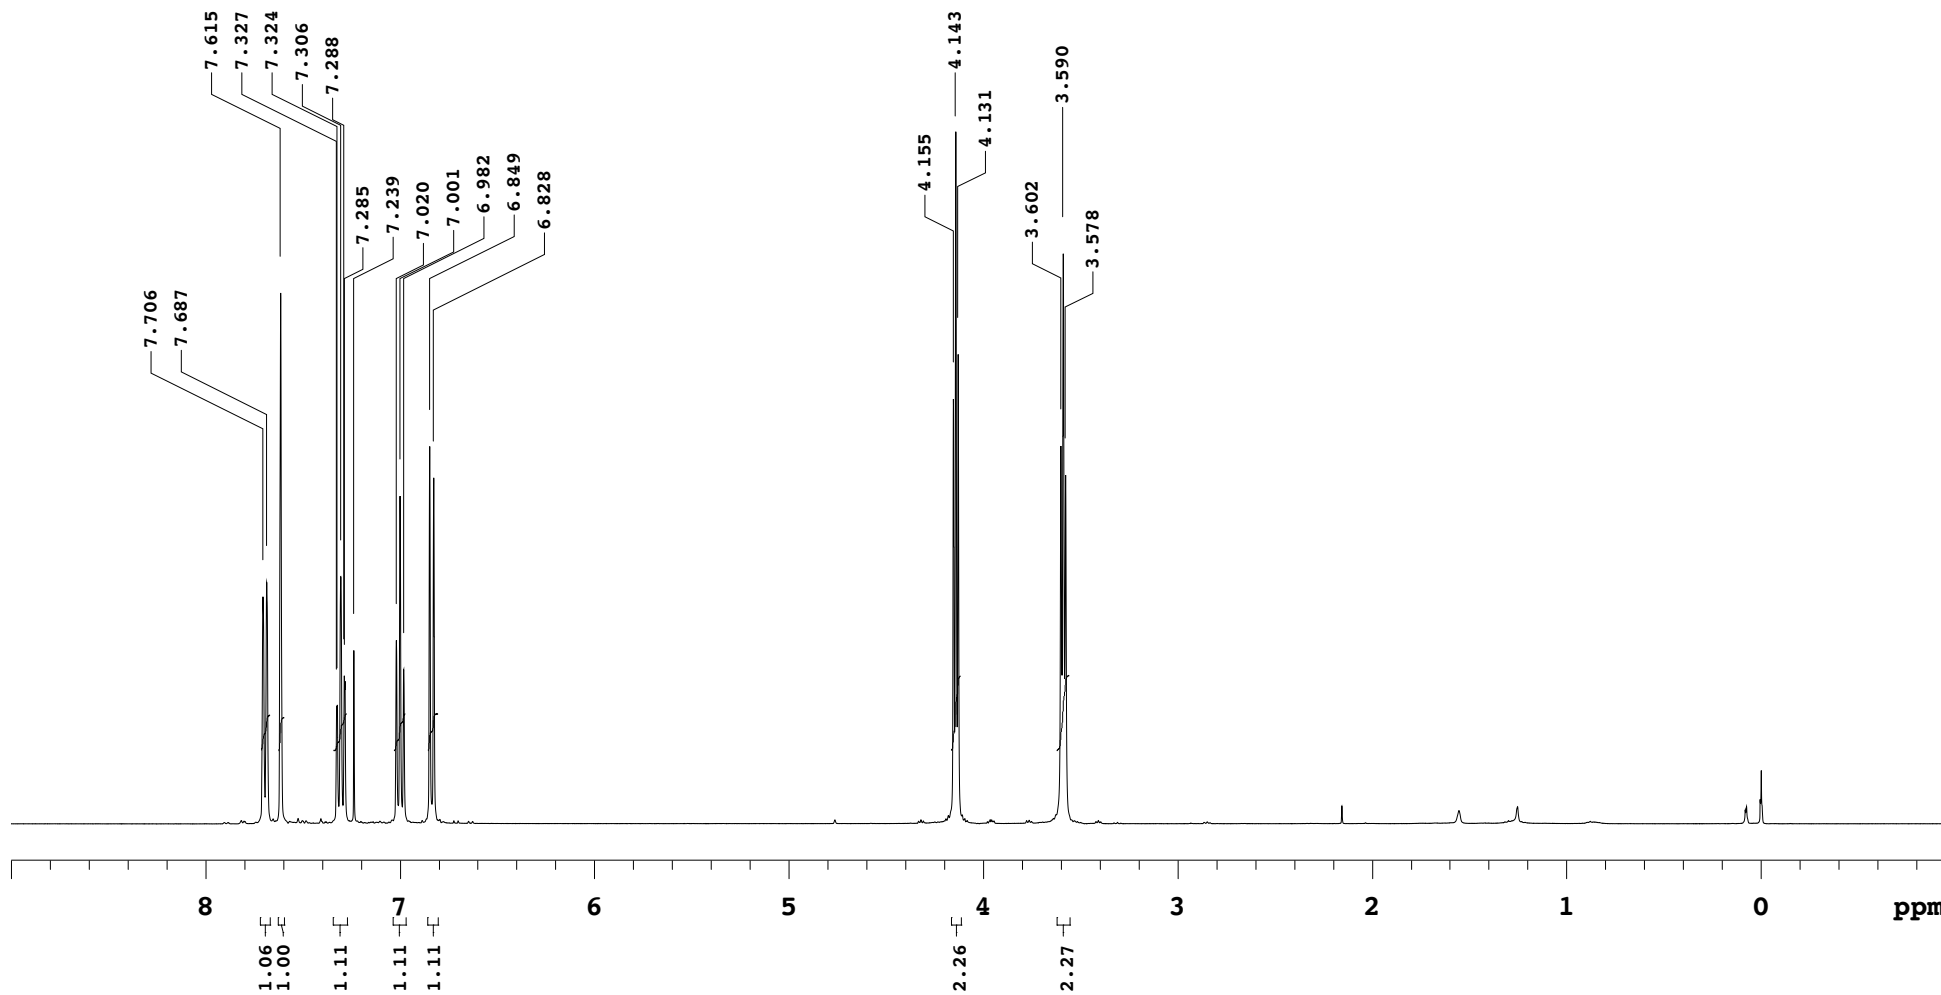

# 1-(2-Azidoethoxy)-2-(2,2-dibromovinyl)benzene (19).

<sup>13</sup>C NMR

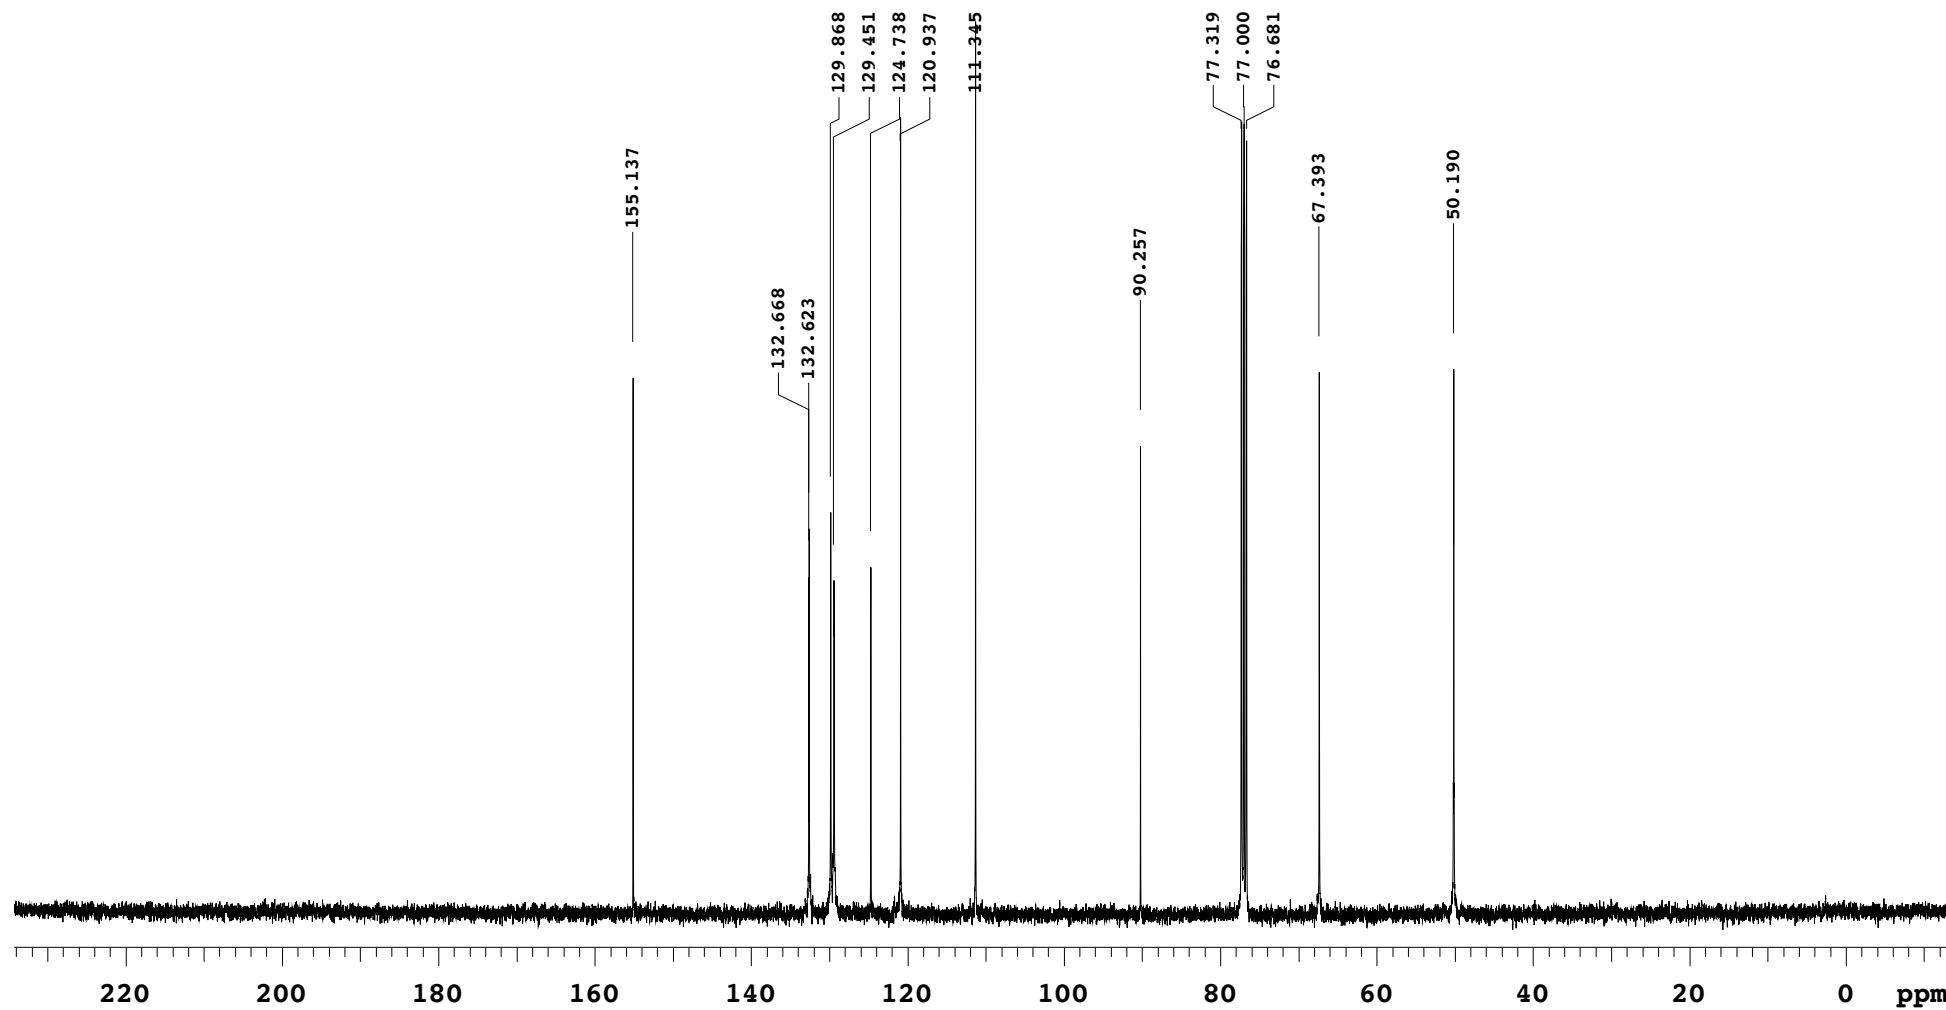

# 1-Chloro-5,6-dihydro-[1,2,3]triazolo[5,1-a]isoquinoline (20).

<sup>1</sup>H NMR

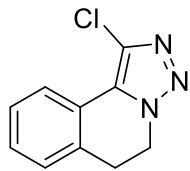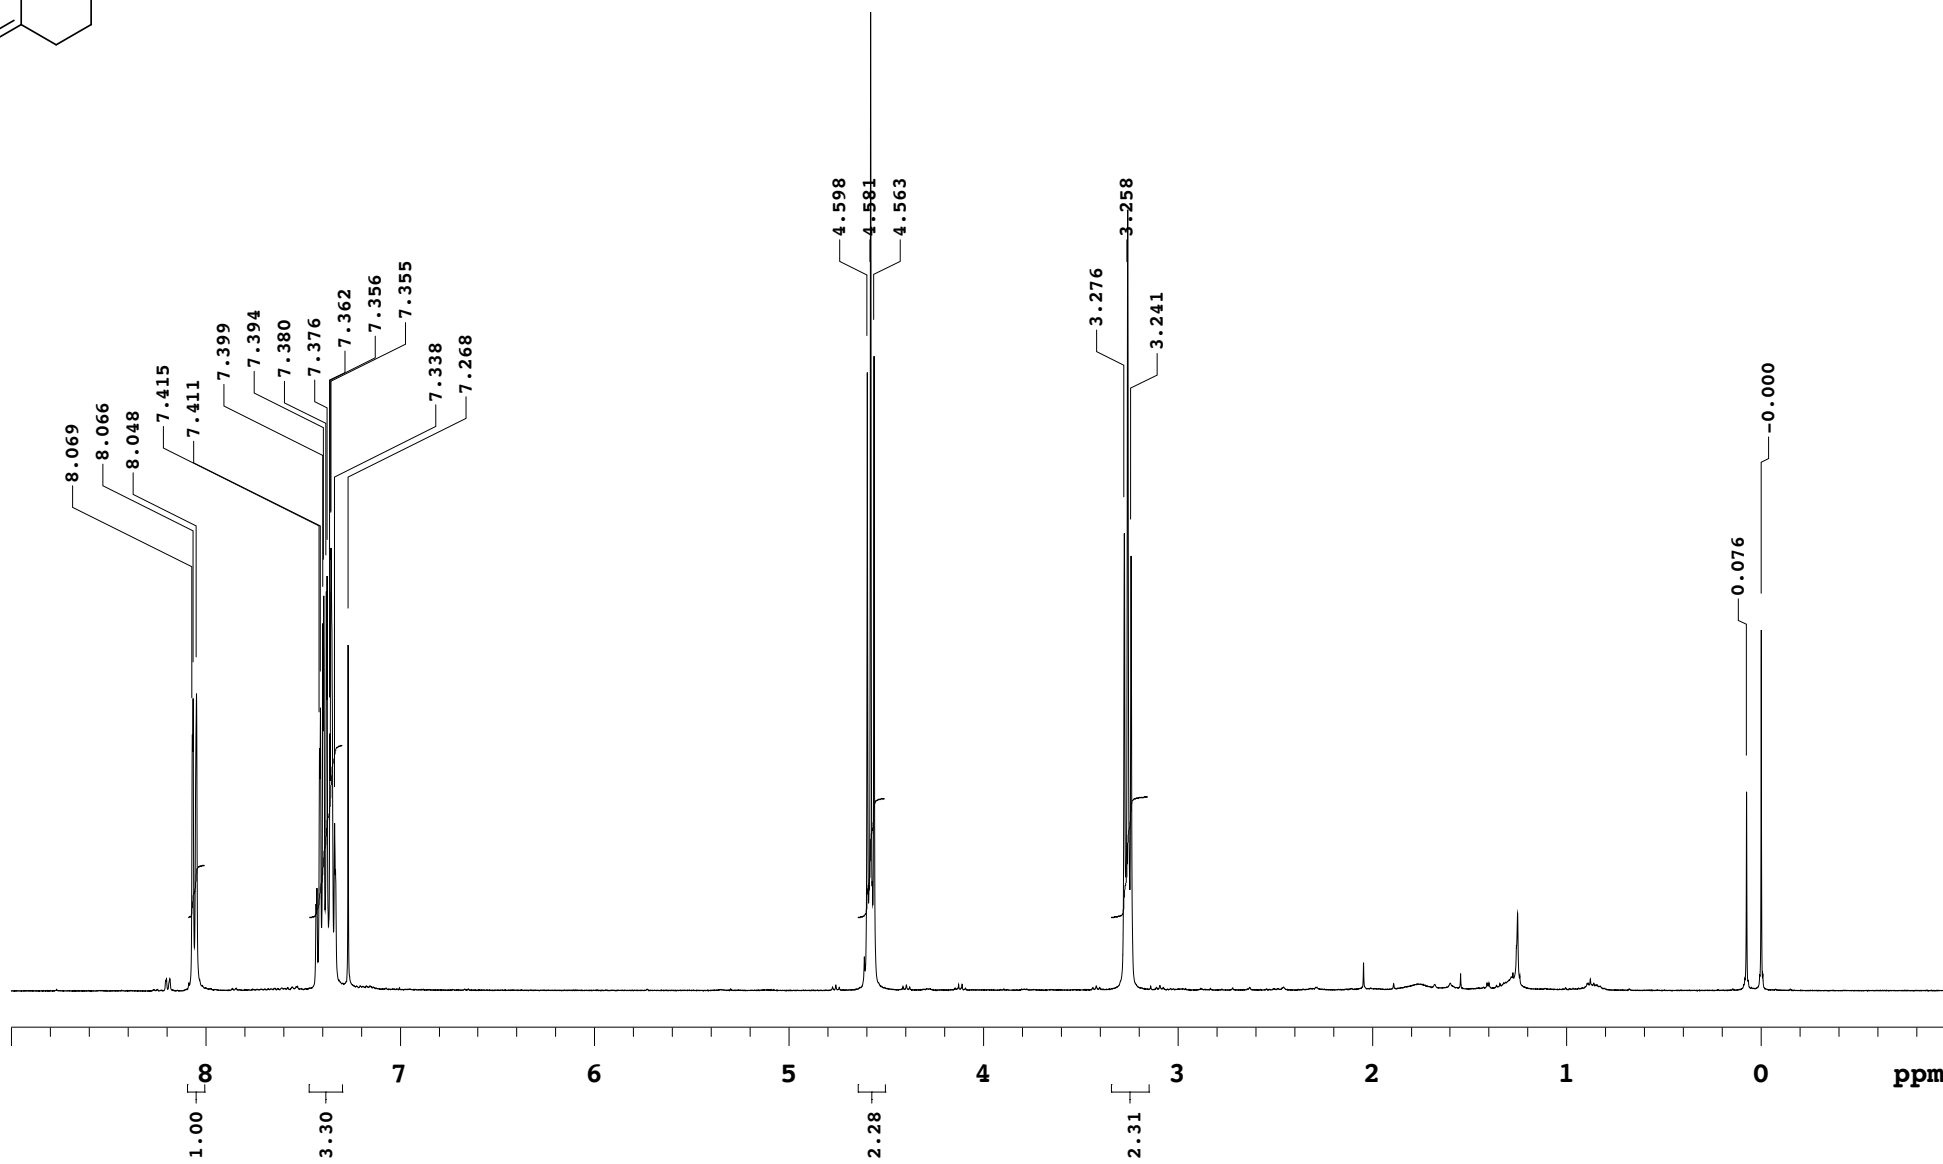

# 1-Chloro-5,6-dihydro-[1,2,3]triazolo[5,1-*a*]isoquinoline (20).

<sup>13</sup>C NMR

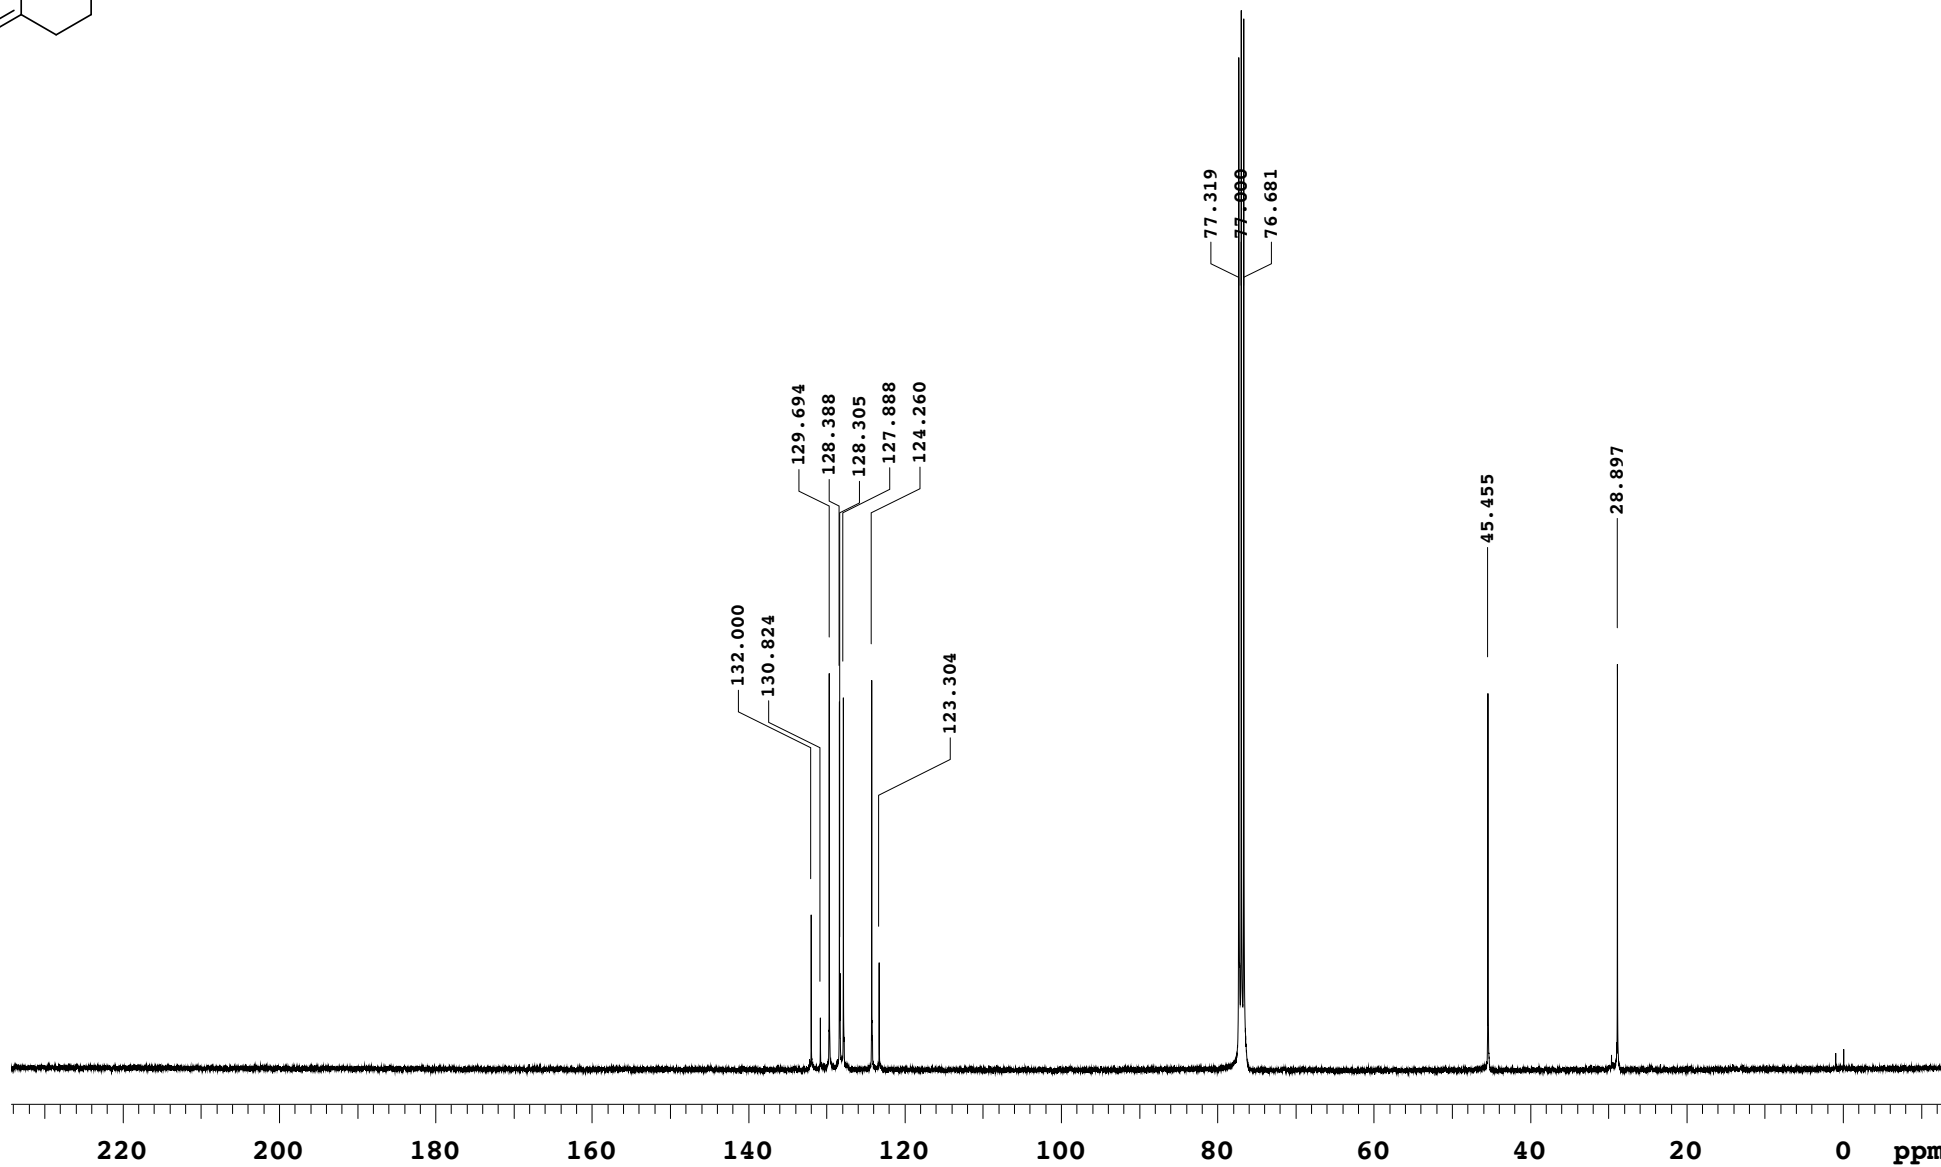

# 1-Iodo-5,6-dihydro-[1,2,3]triazolo[5,1-*a*]isoquinoline (21).

<sup>1</sup>H NMR

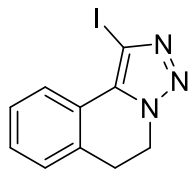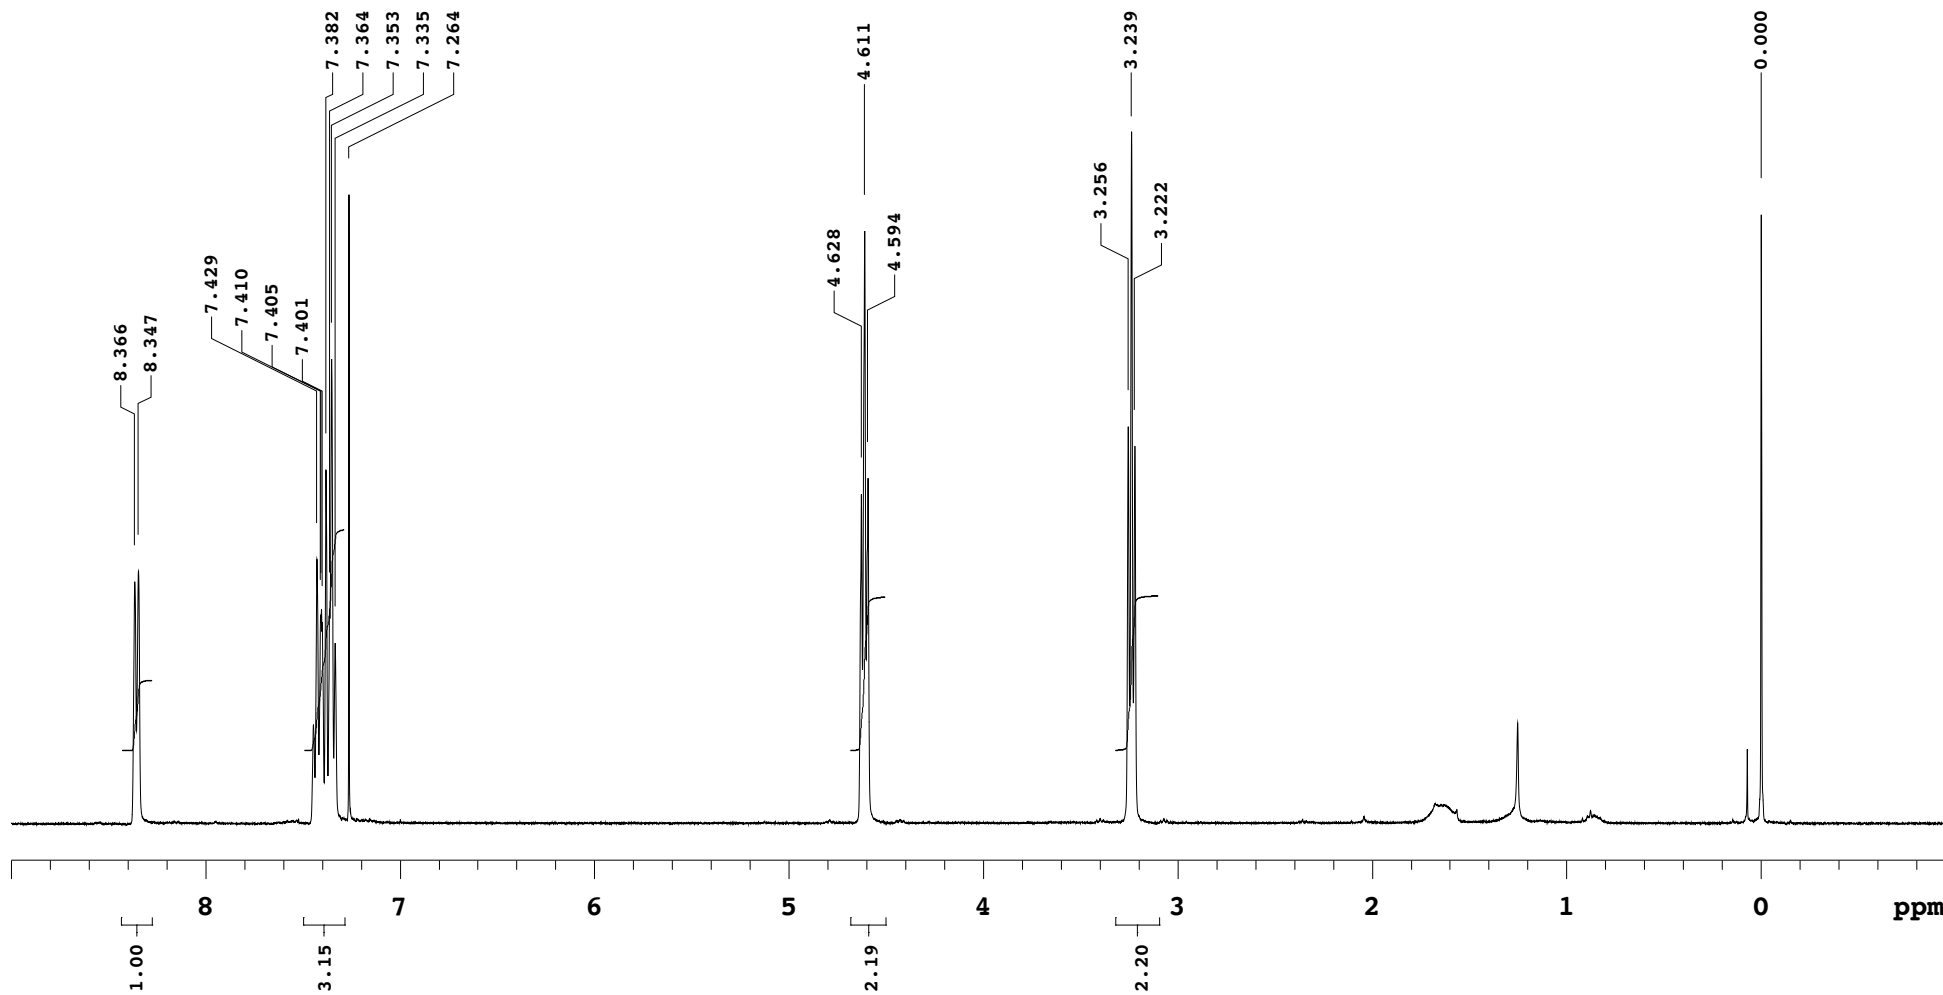

# 1-Iodo-5,6-dihydro-[1,2,3]triazolo[5,1-*a*]isoquinoline (21).

<sup>13</sup>C NMR

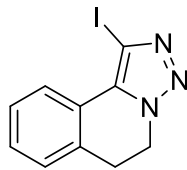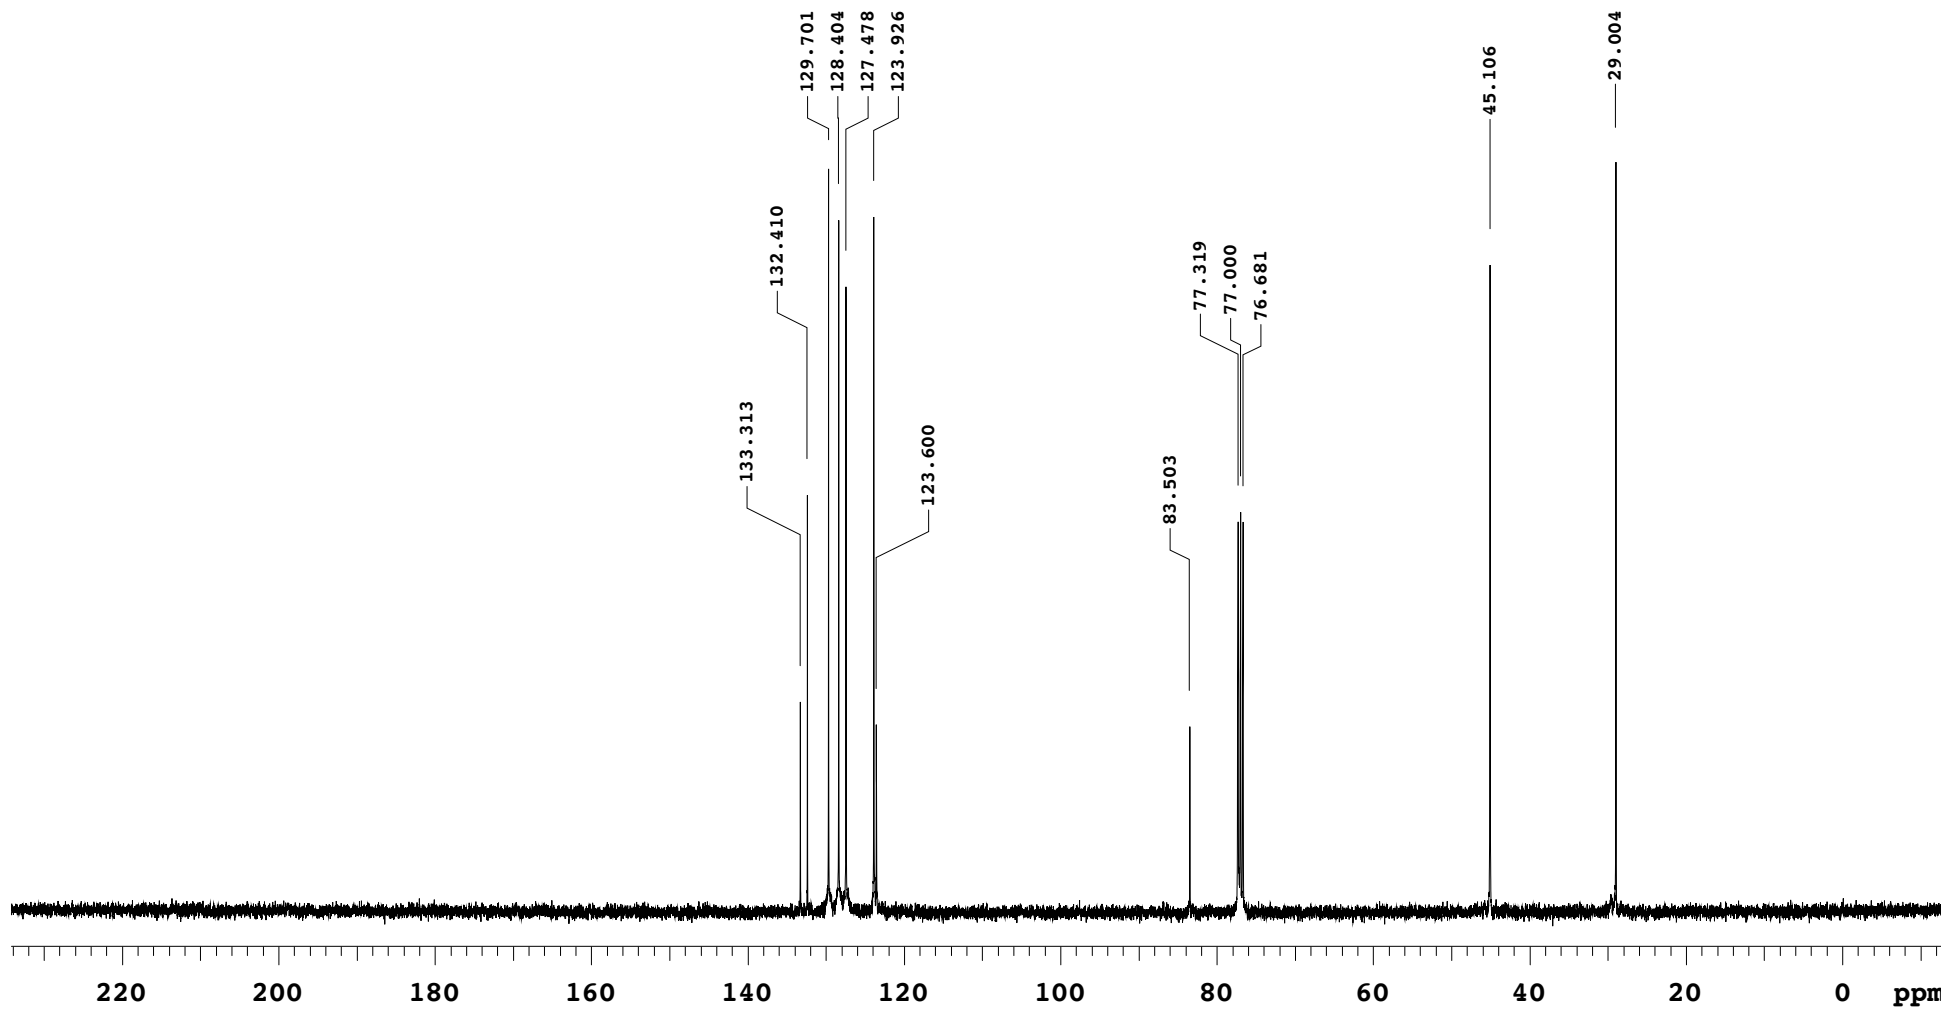

# 1-Fluoro-5,6-dihydro-[1,2,3]triazolo[5,1-a]isoquinoline (22).

<sup>1</sup>H NMR

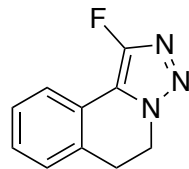

7.664  
7.646  
7.644  
7.406  
7.399  
7.391  
7.381  
7.373  
7.369  
7.354  
7.350  
7.346  
7.345  
7.338  
7.336  
7.266

4.576  
4.574  
4.565  
4.557  
4.550  
4.541  
4.539

3.287  
3.269  
3.252

1.646

0.000

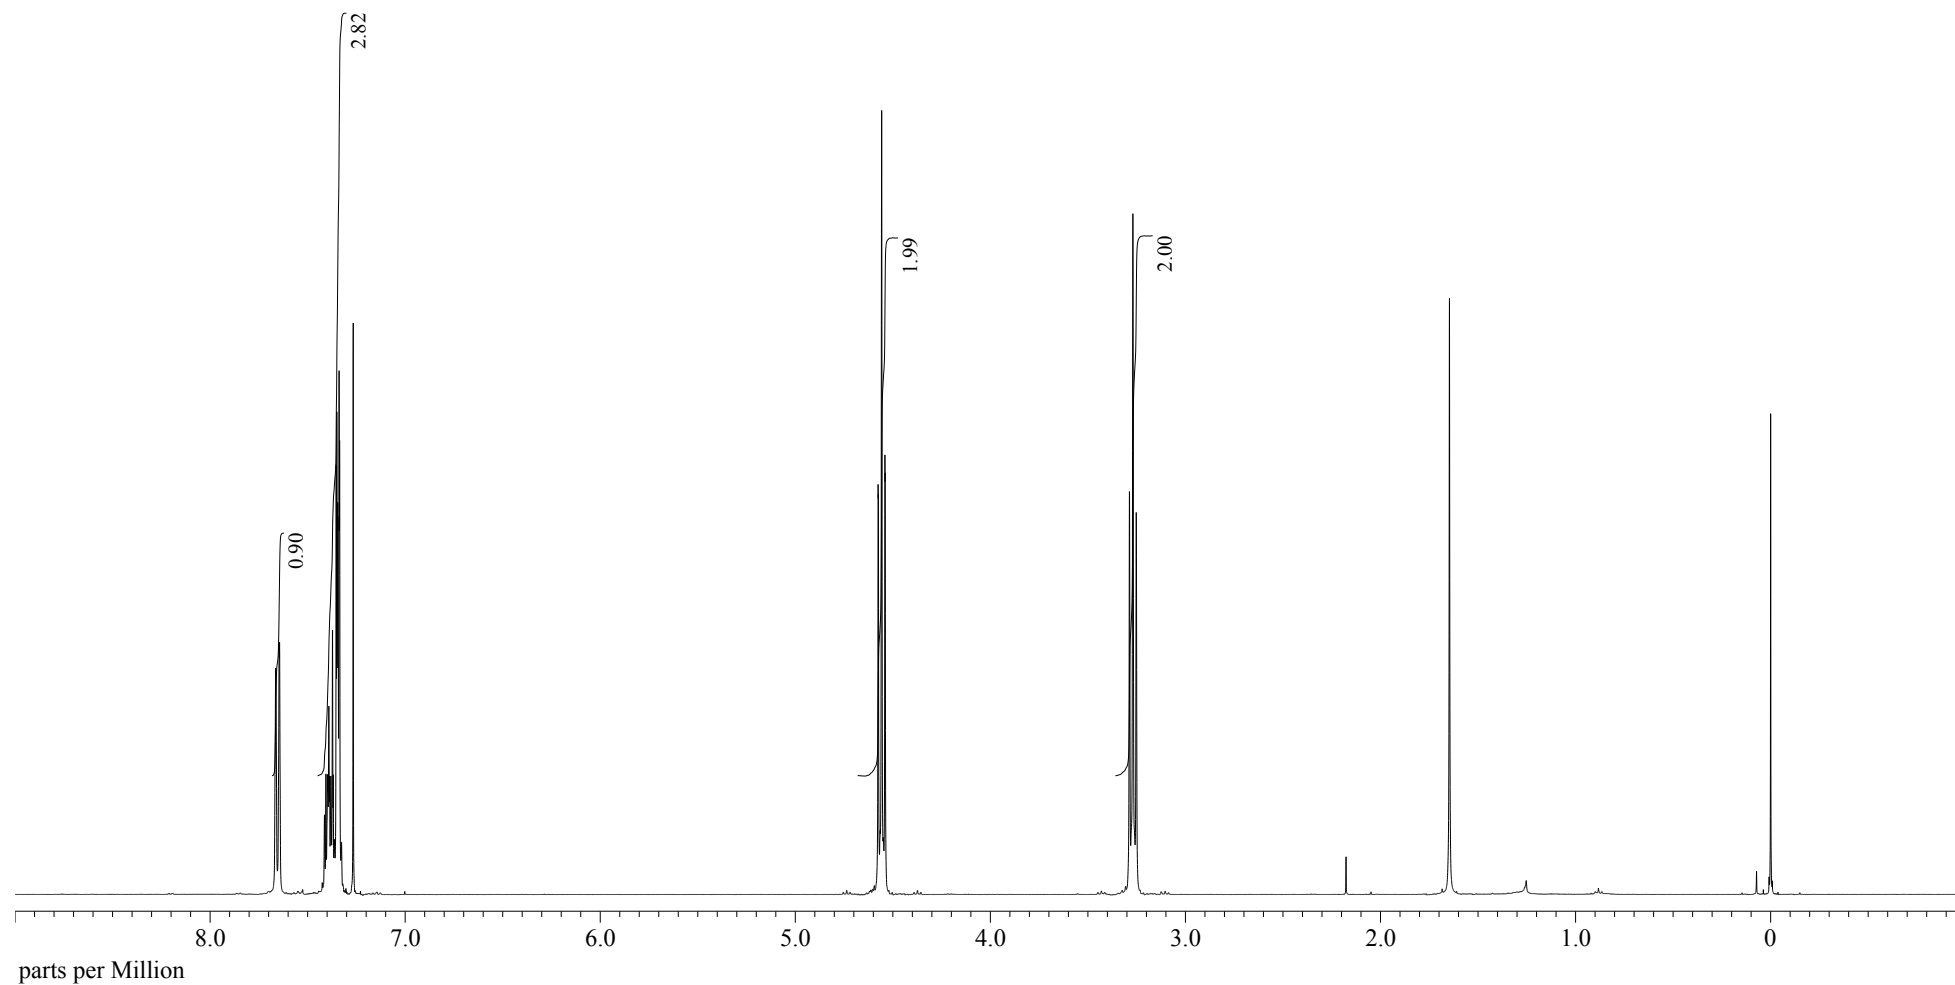

# 1-Fluoro-5,6-dihydro-[1,2,3]triazolo[5,1-a]isoquinoline (22).

<sup>13</sup>C NMR



158.420  
155.976

131.210  
131.195  
129.303  
128.383  
128.028  
124.324  
124.286  
122.853  
122.810  
116.246  
115.949

77.321  
77.206  
77.000  
76.684

45.760

28.665

-0.031

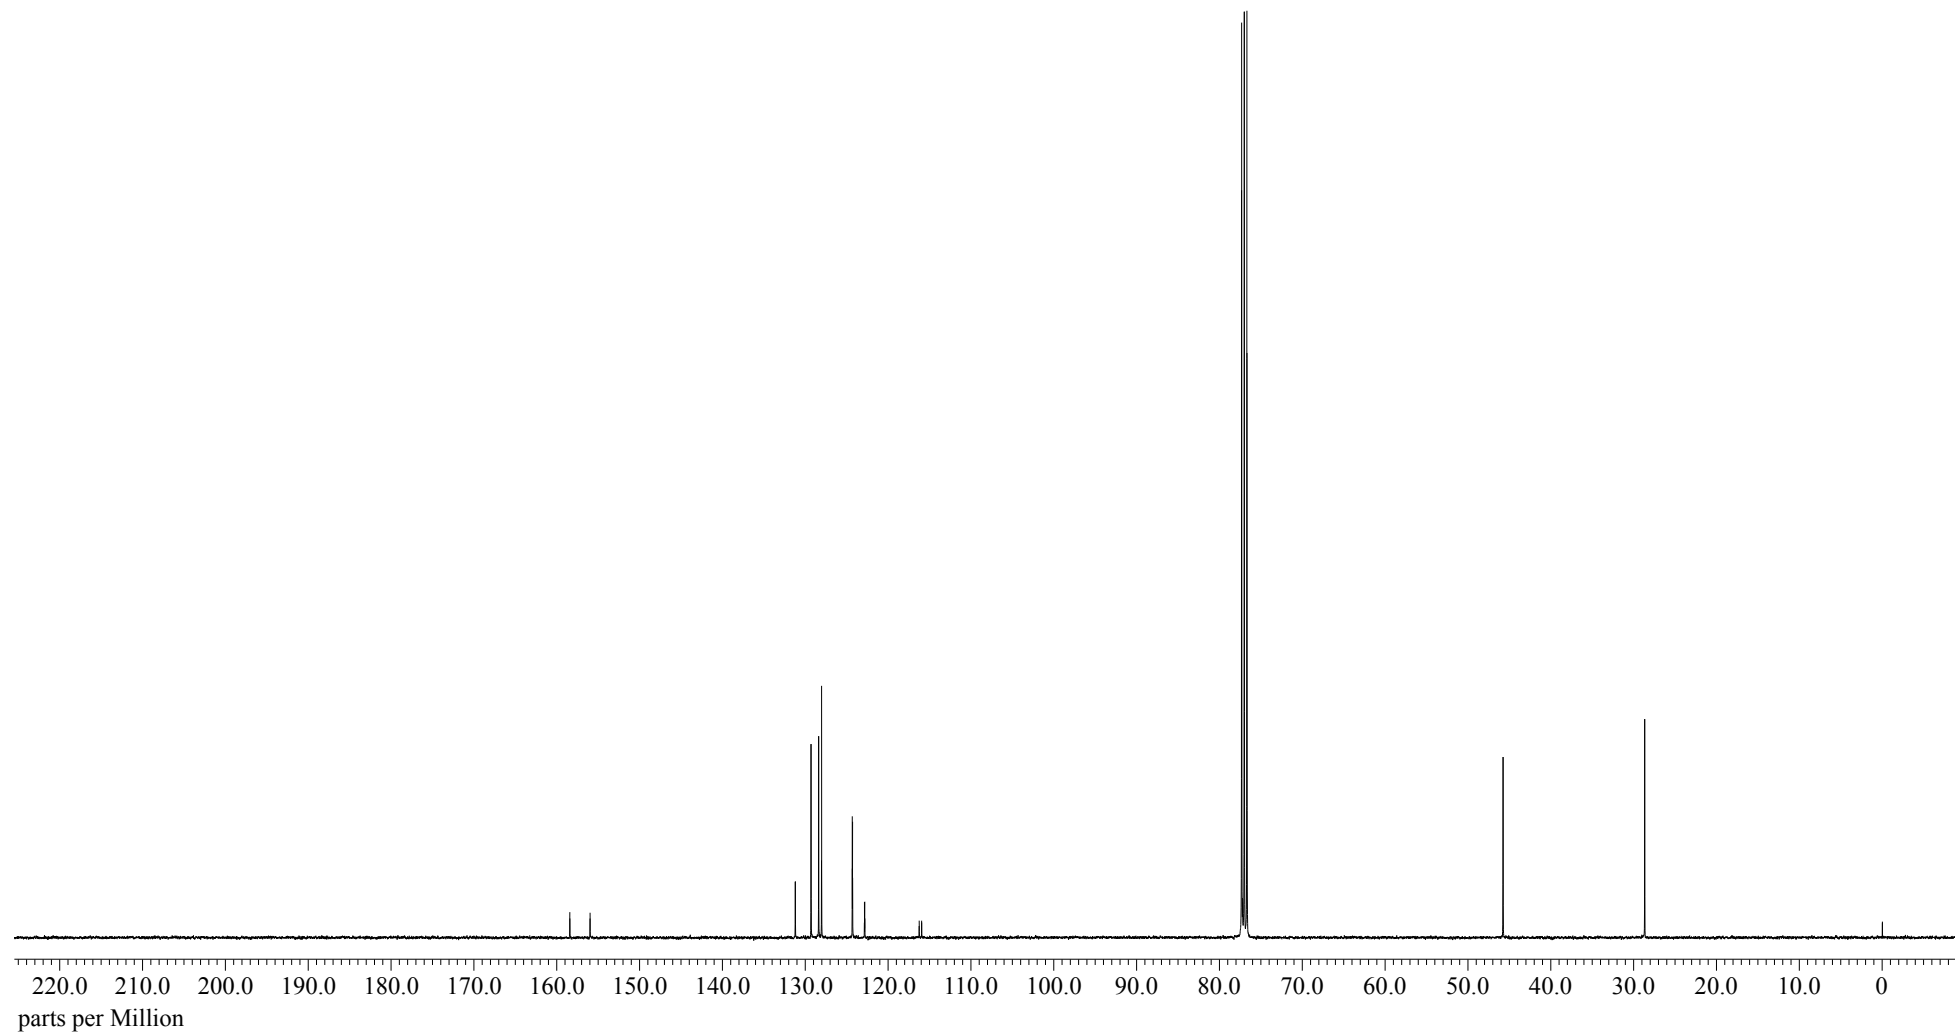



1-Fluoro-5,6-dihydro-[1,2,3]triazolo[5,1-a]isoquinoline (22).

<sup>19</sup>F NMR

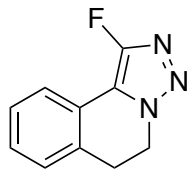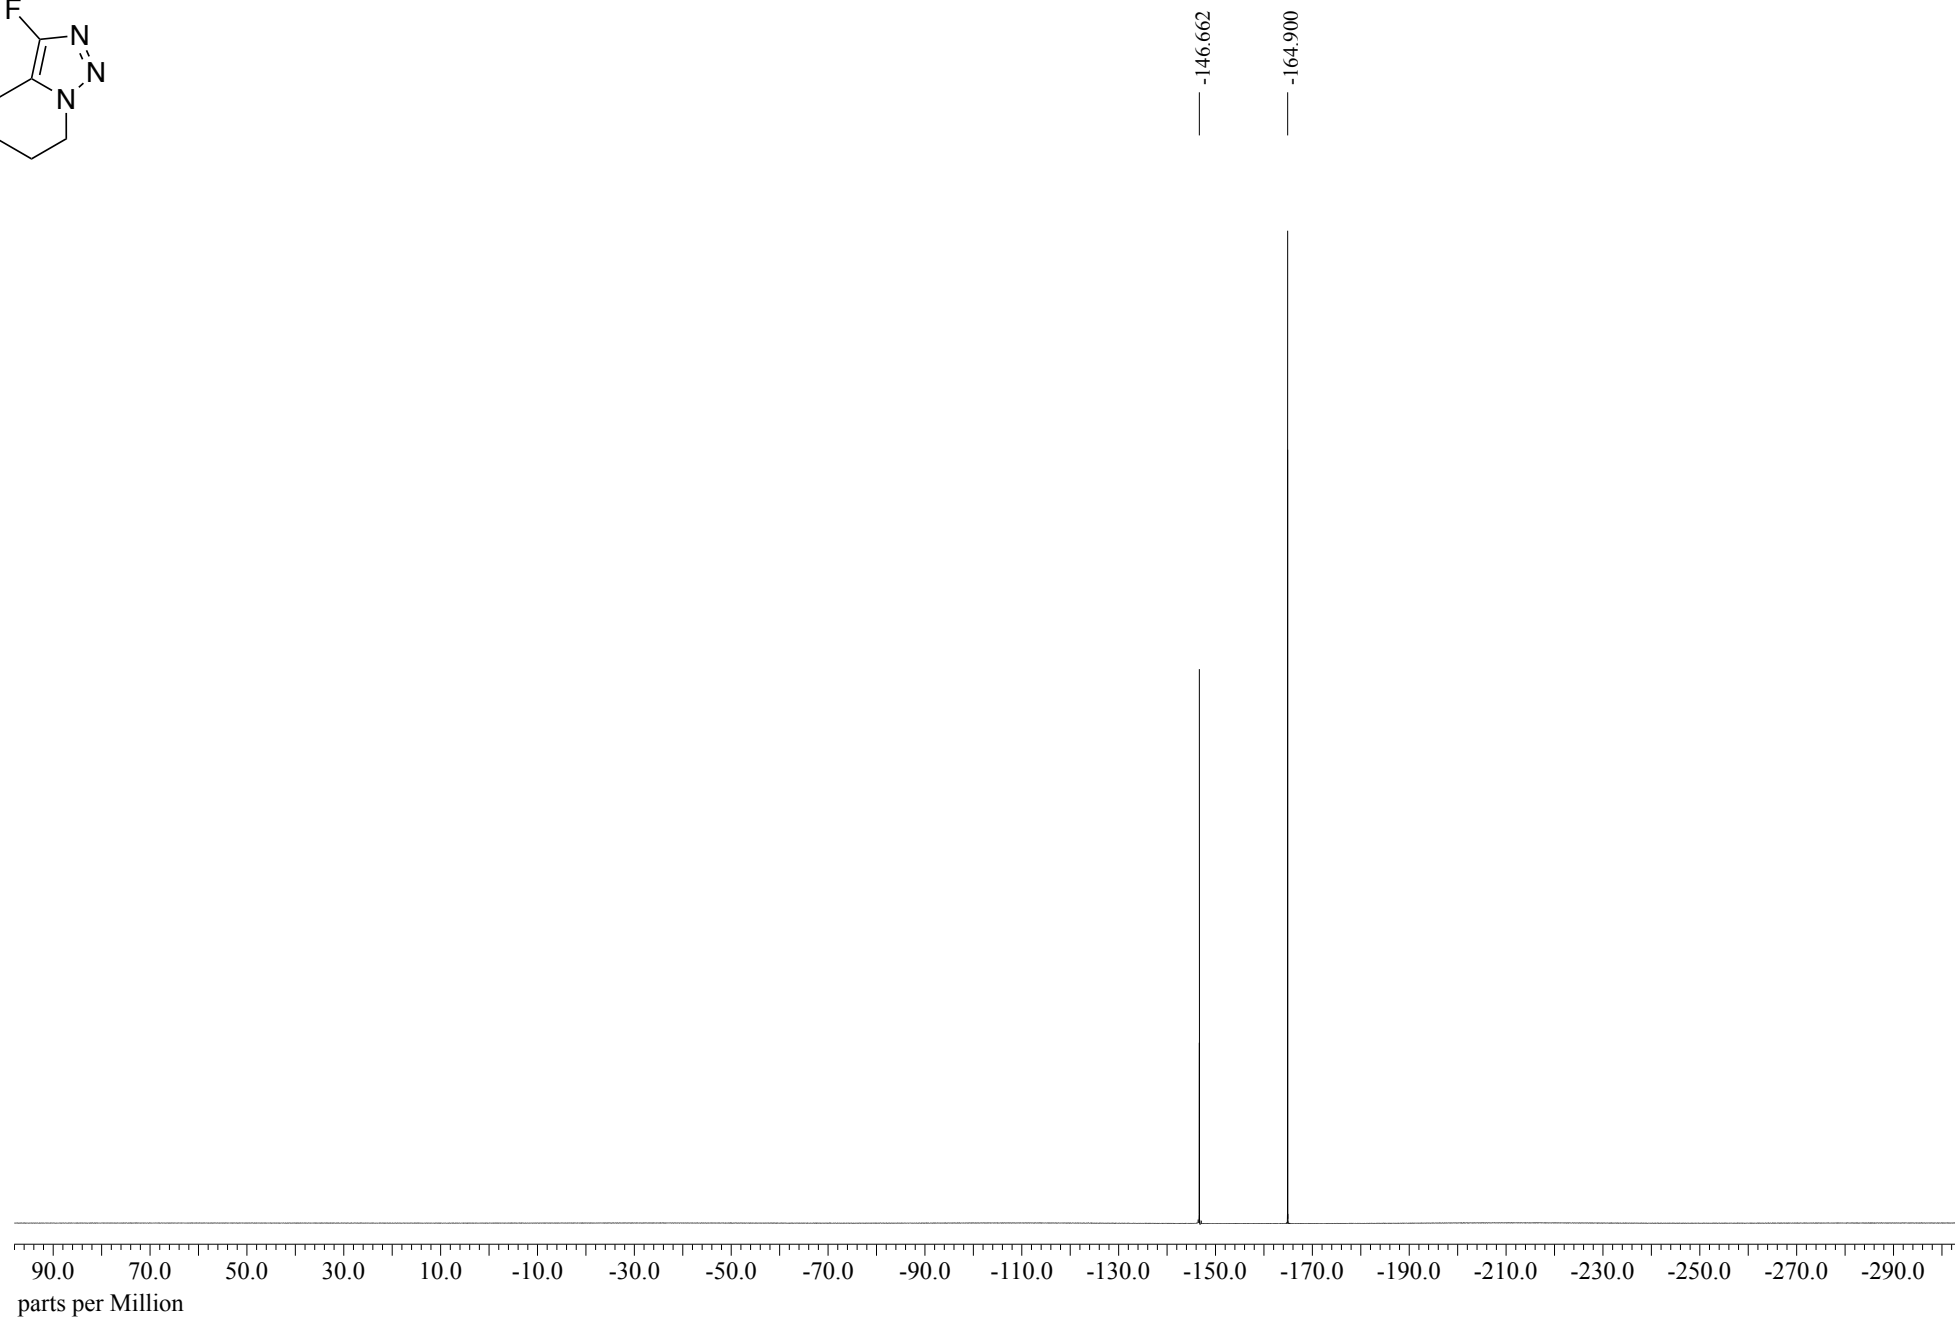

# 1-Bromo-9-chloro-5,6-dihydro-[1,2,3]triazolo[5,1-a]isoquinoline (23).

<sup>1</sup>H NMR

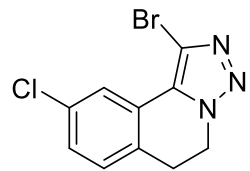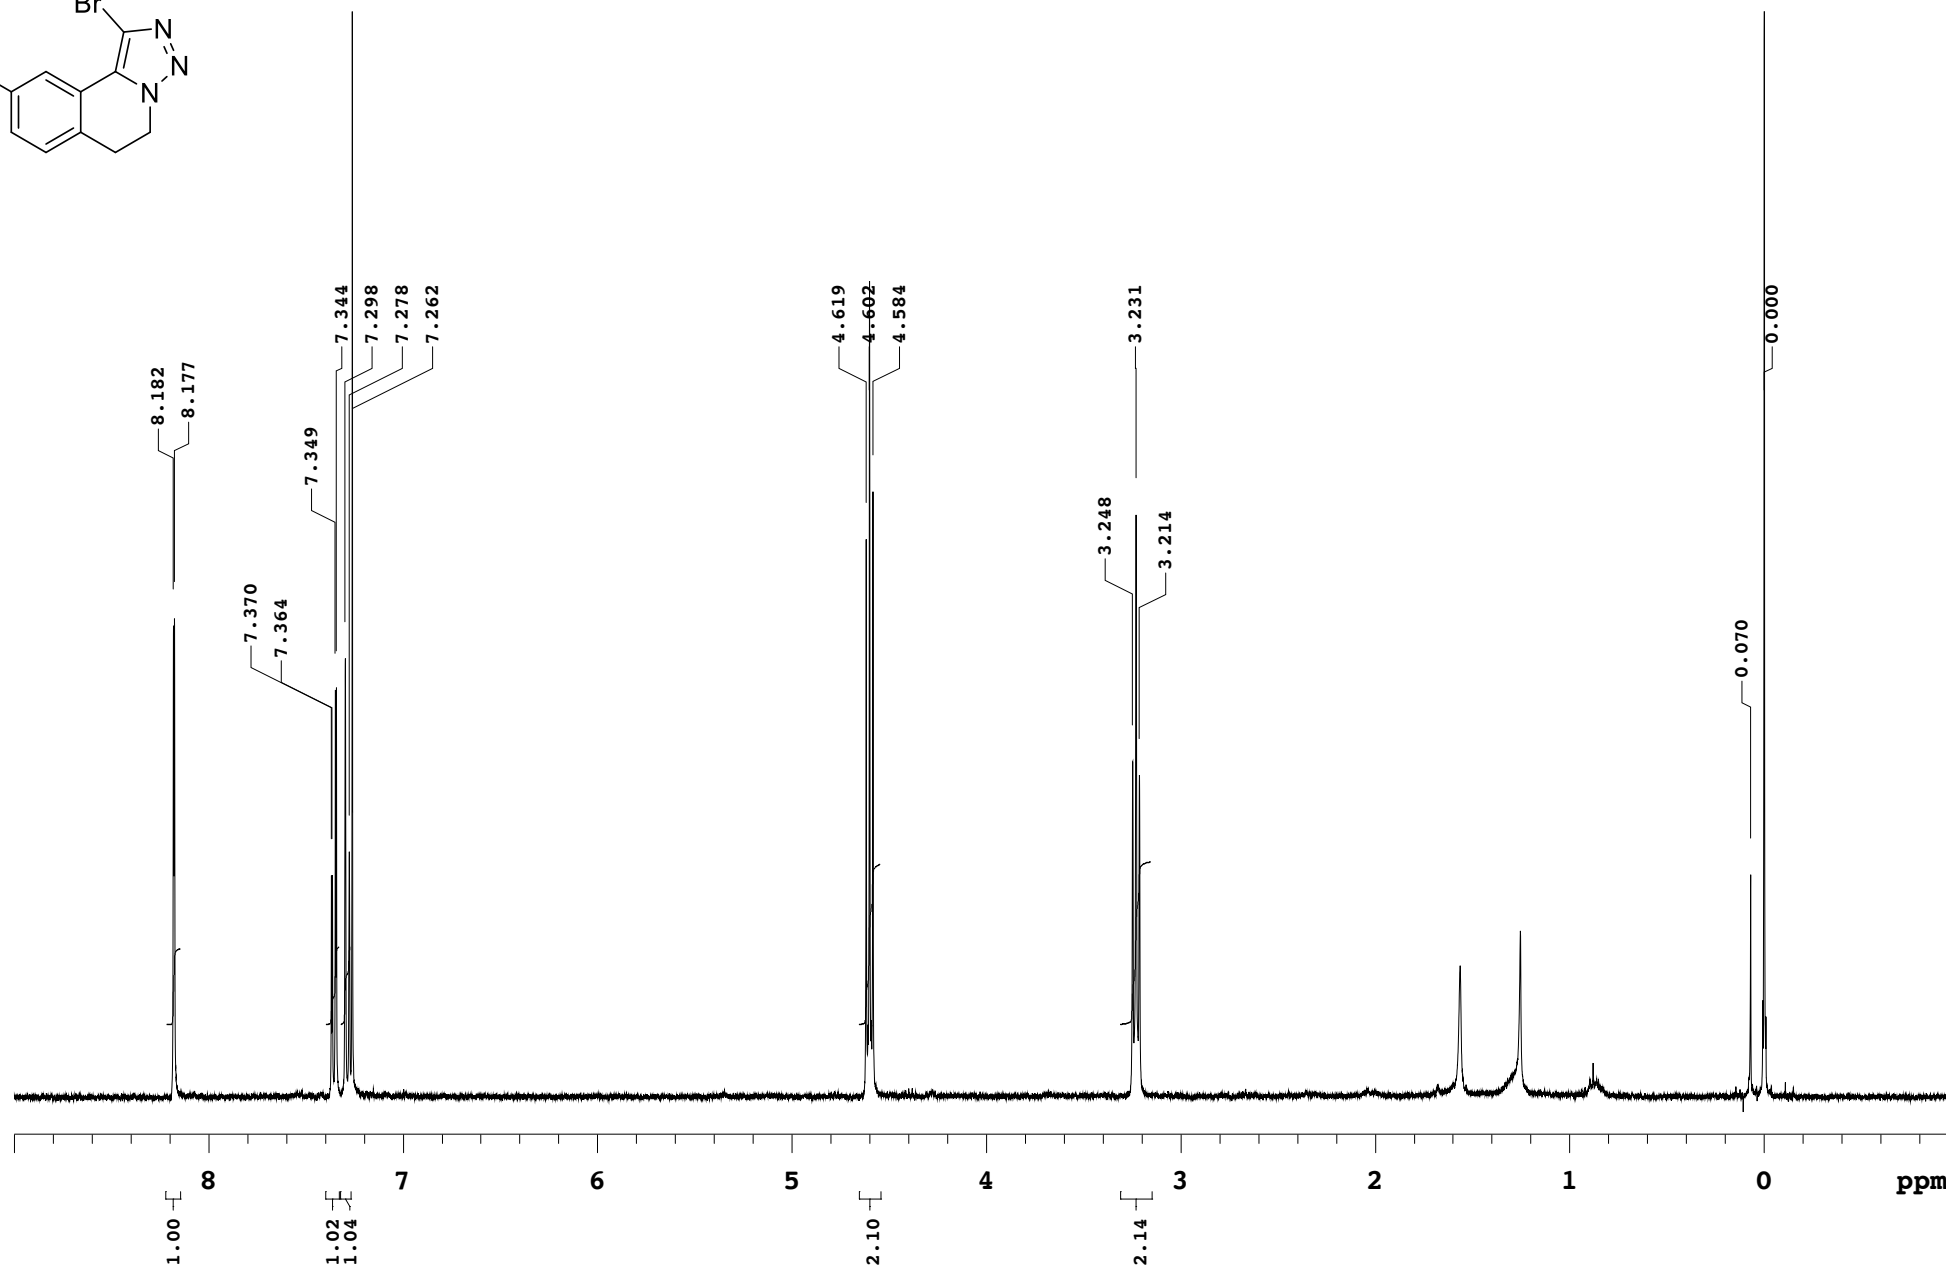

# 1-Bromo-9-chloro-5,6-dihydro-[1,2,3]triazolo[5,1-a]isoquinoline (23).

<sup>13</sup>C NMR

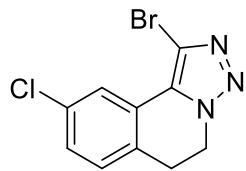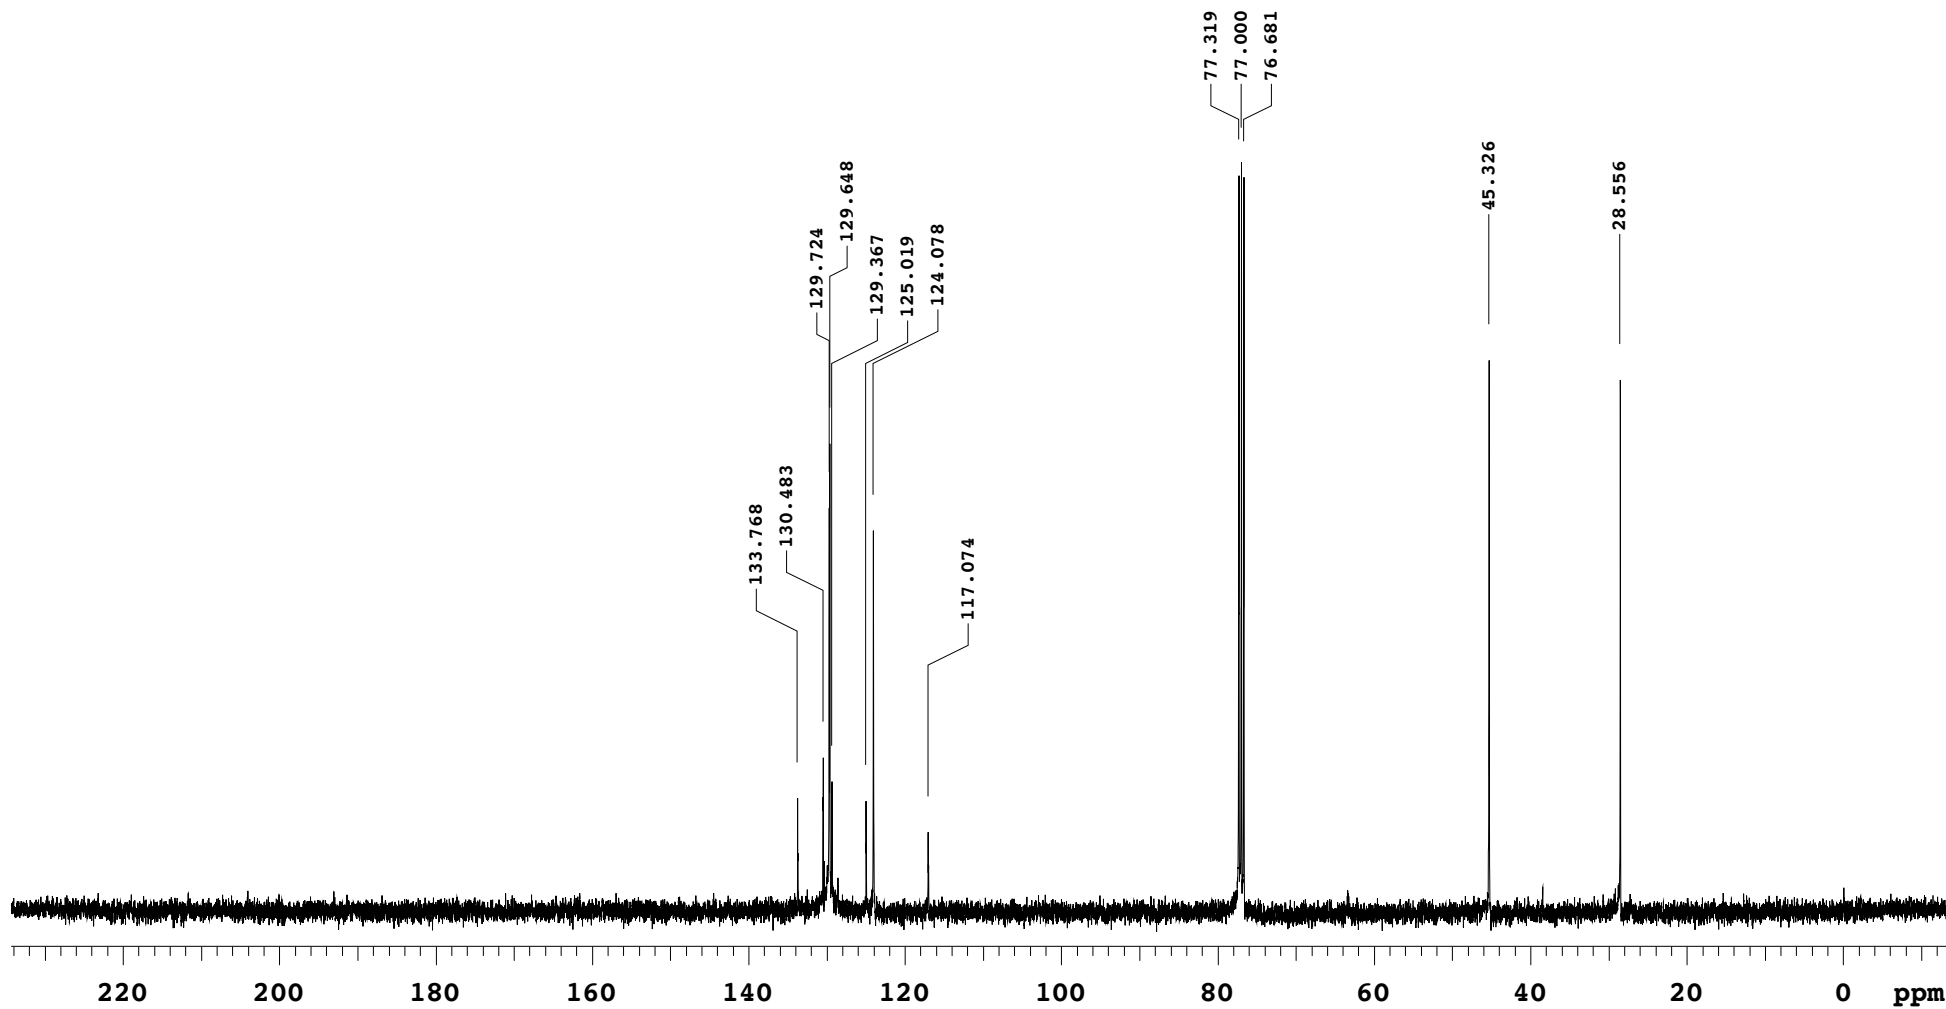

# 1-Bromo-5H-benzo[e][1,2,3]triazolo[1,5-c][1,3]thiazine (24).

<sup>1</sup>H NMR

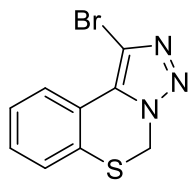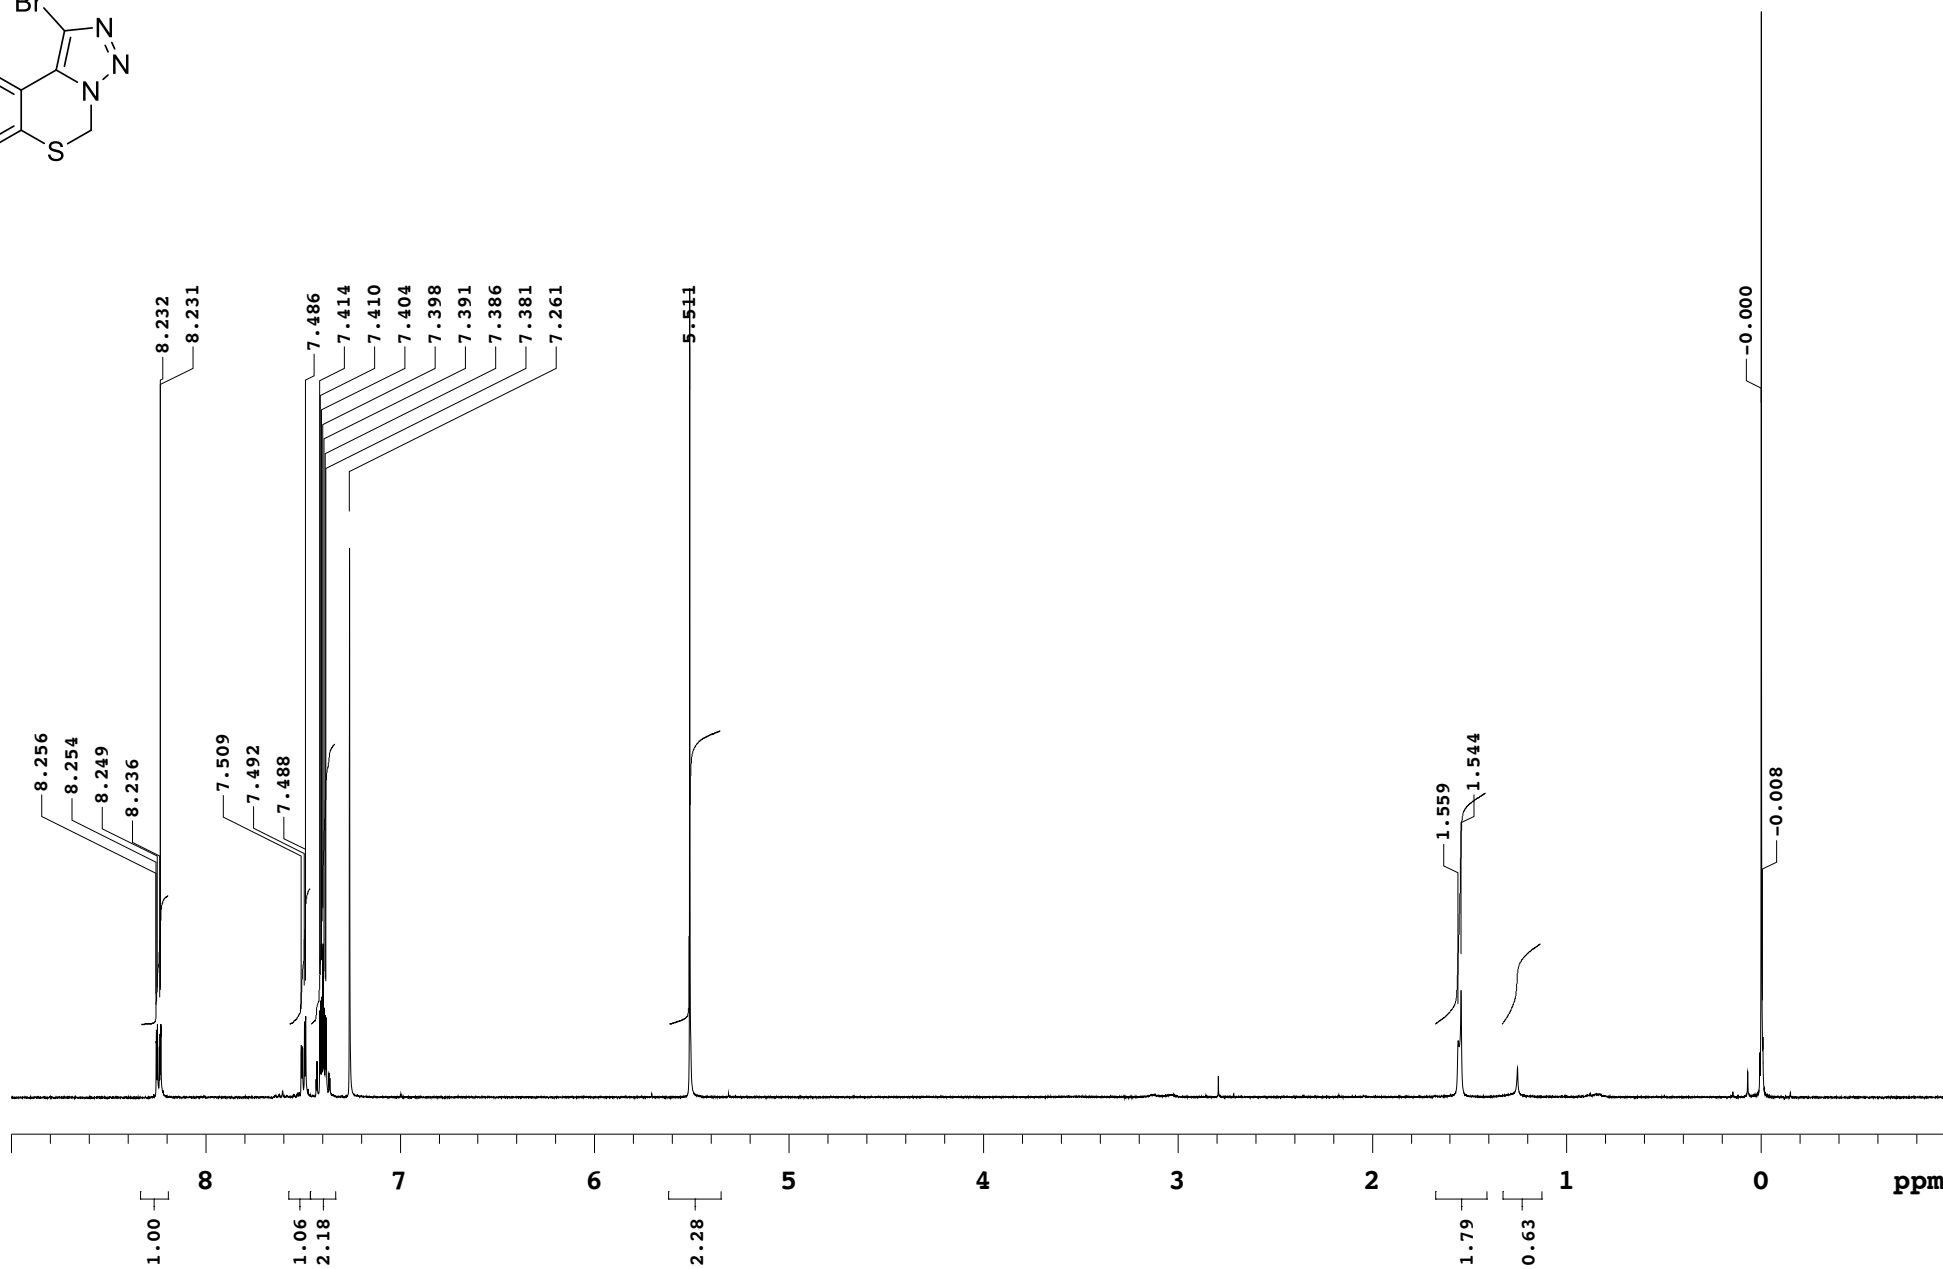

# 1-Bromo-5*H*-benzo[*e*][1,2,3]triazolo[1,5-*c*][1,3]thiazine (24).

<sup>13</sup>C NMR

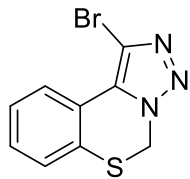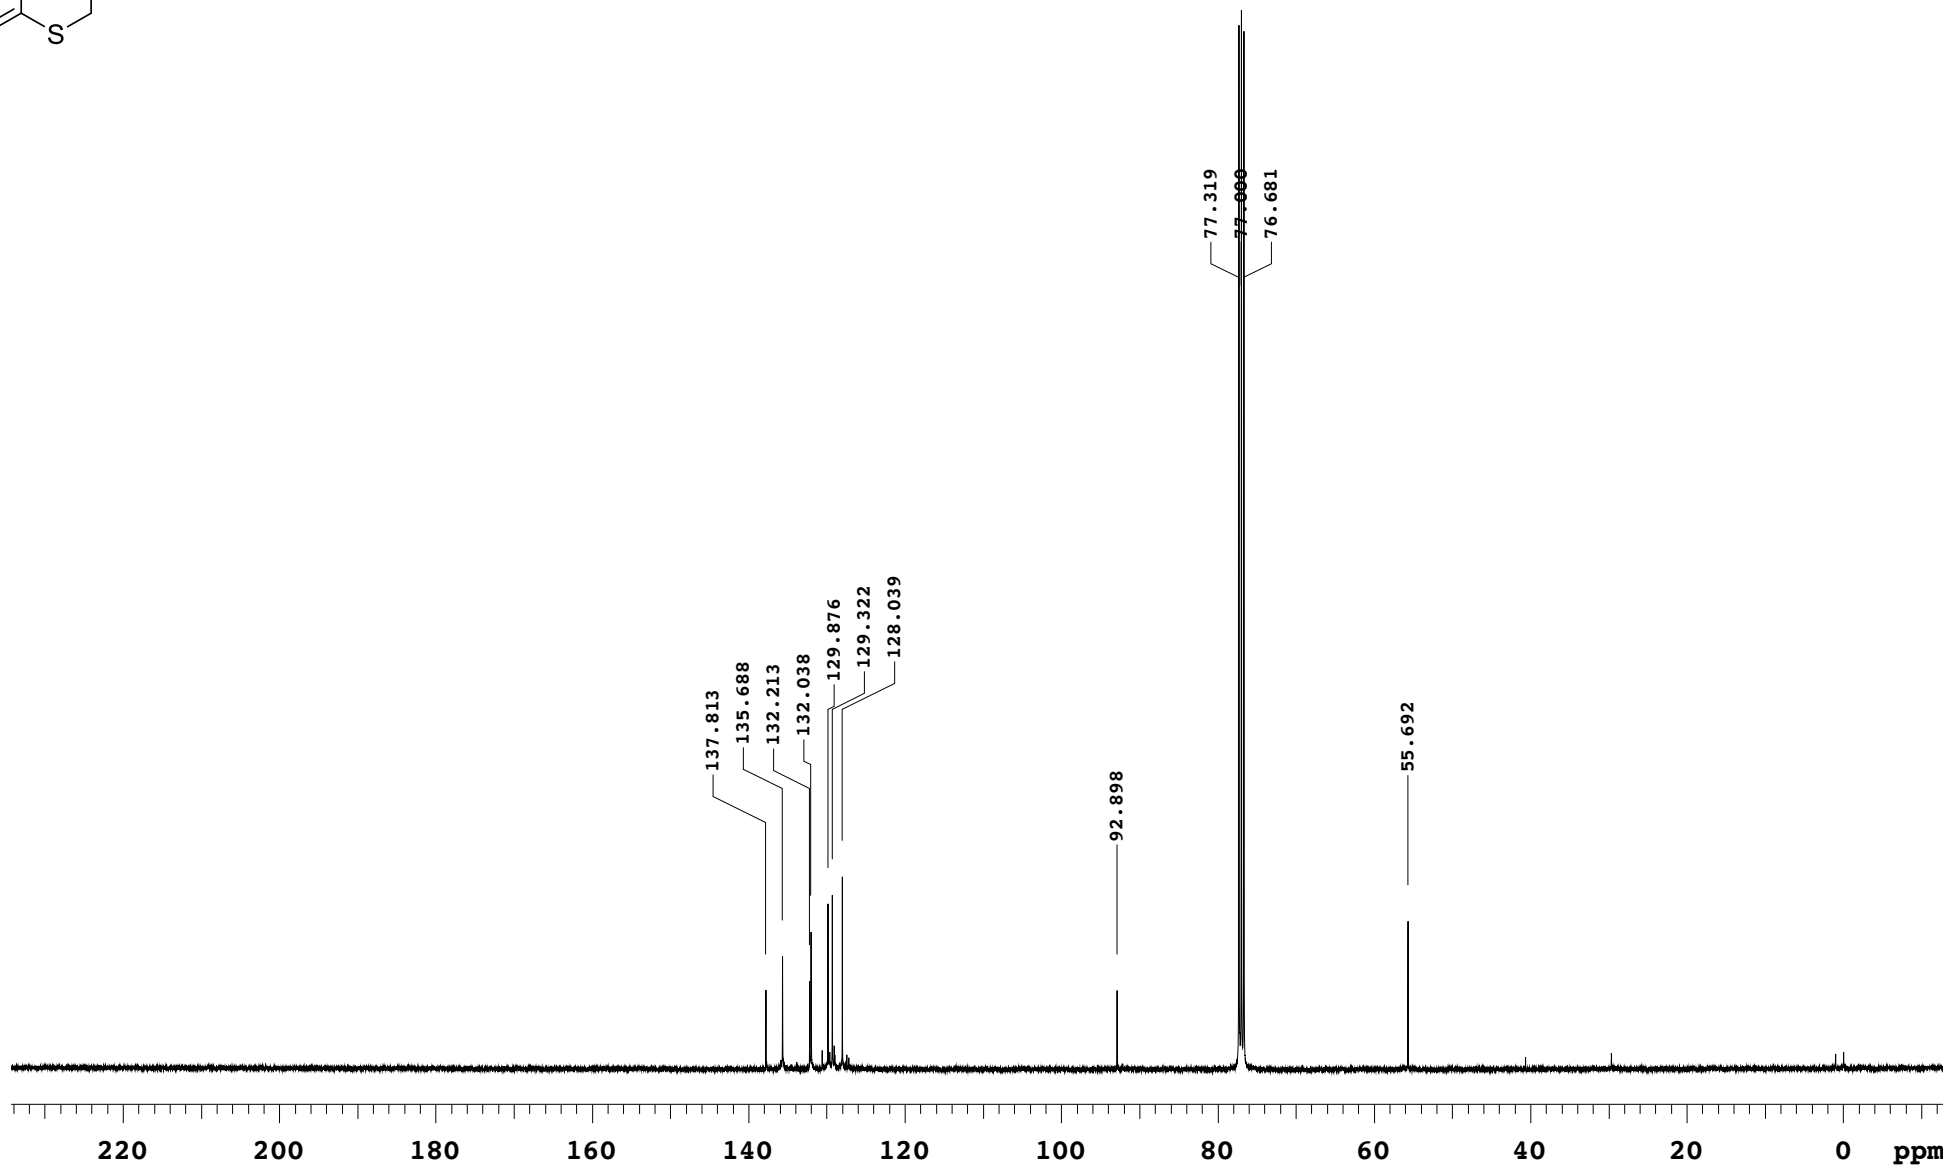

# 3-Bromo-8*H*-[1,2,3]triazolo[5,1-*a*]isoindole (25).

<sup>1</sup>H NMR

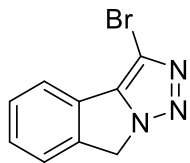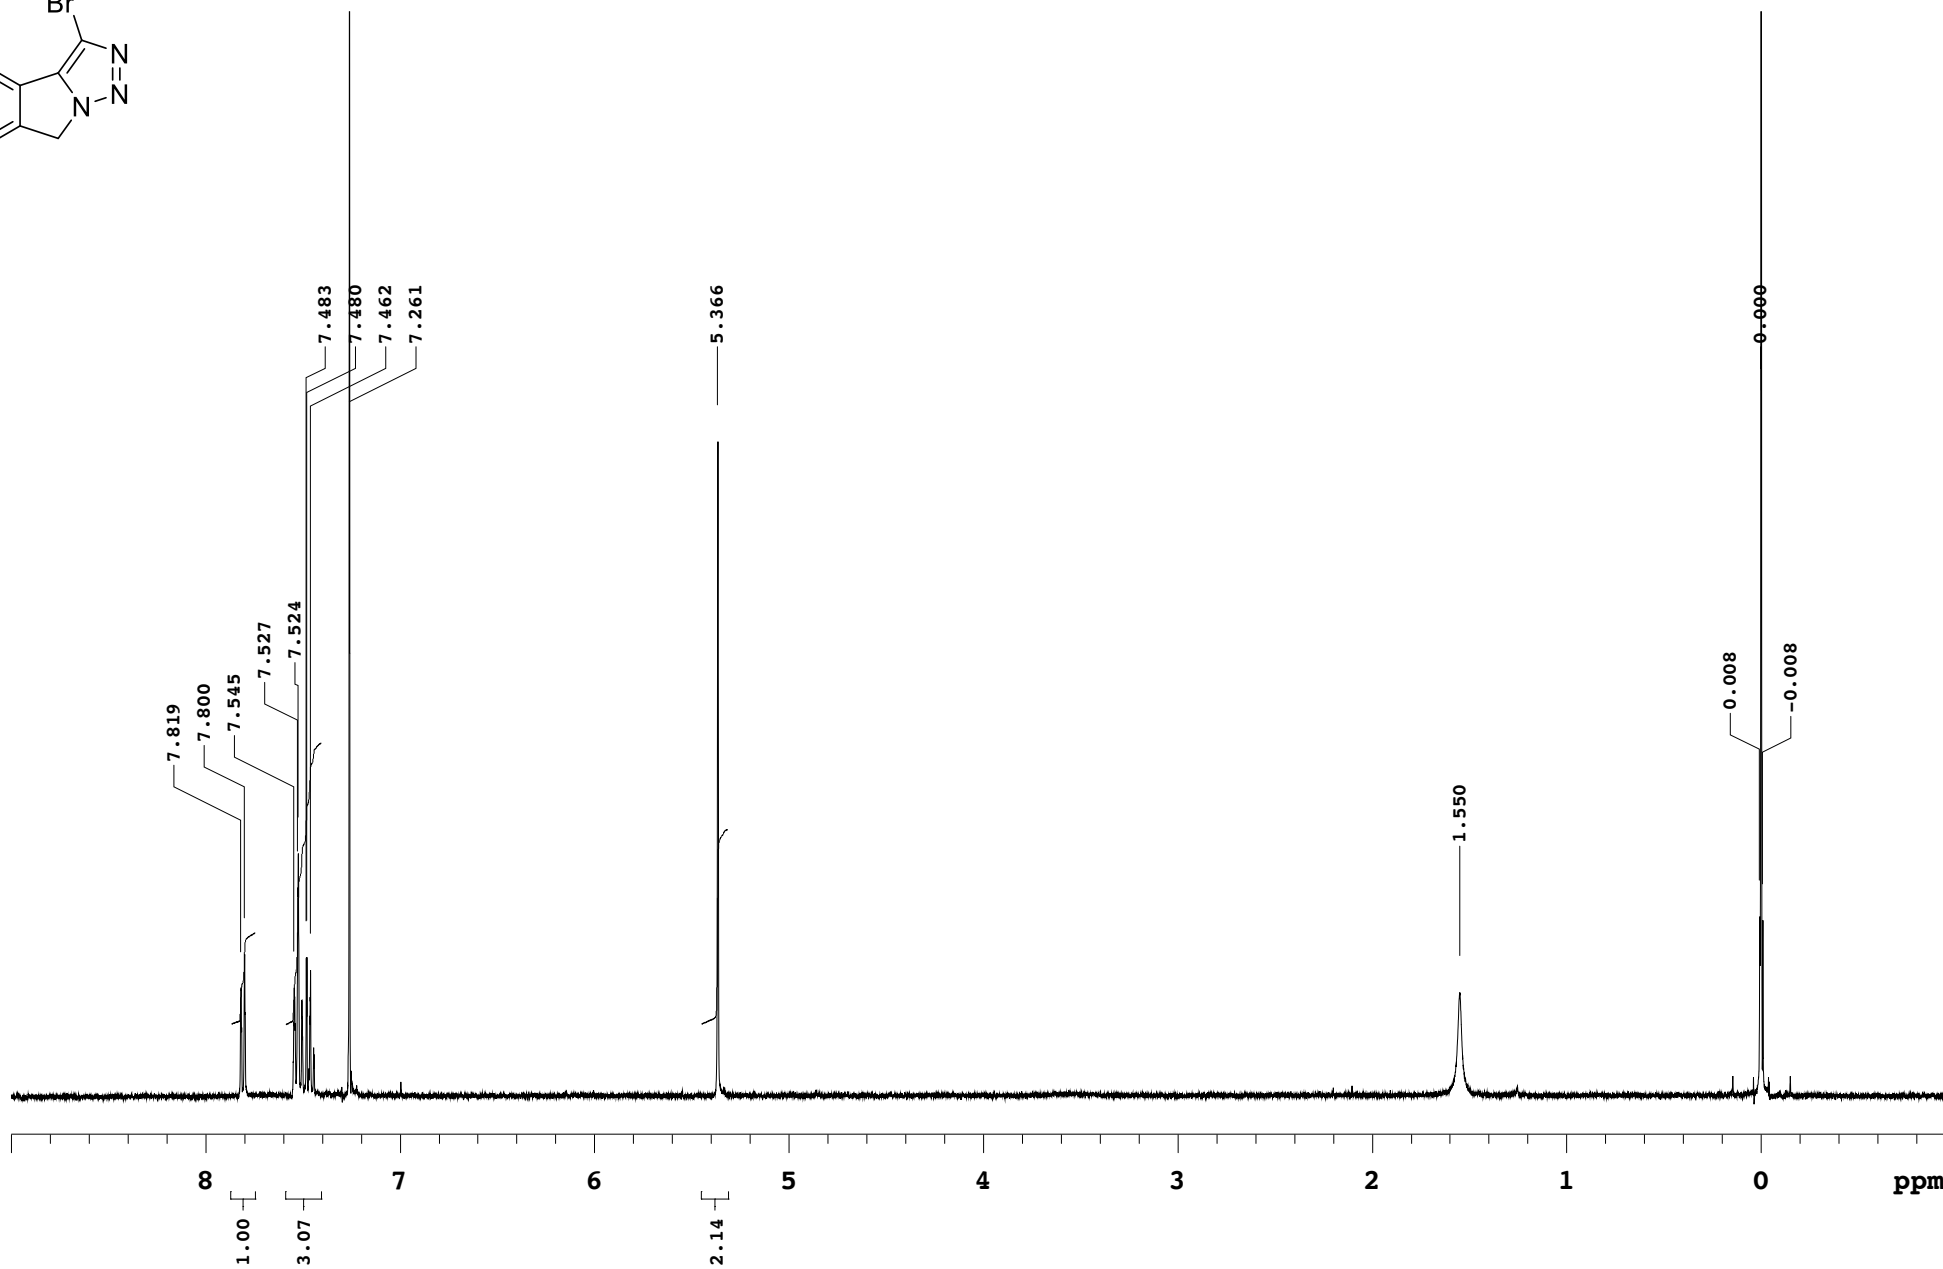

# 3-Bromo-8*H*-[1,2,3]triazolo[5,1-*a*]isoindole (25).

<sup>13</sup>C NMR

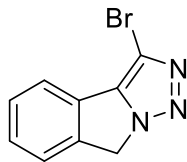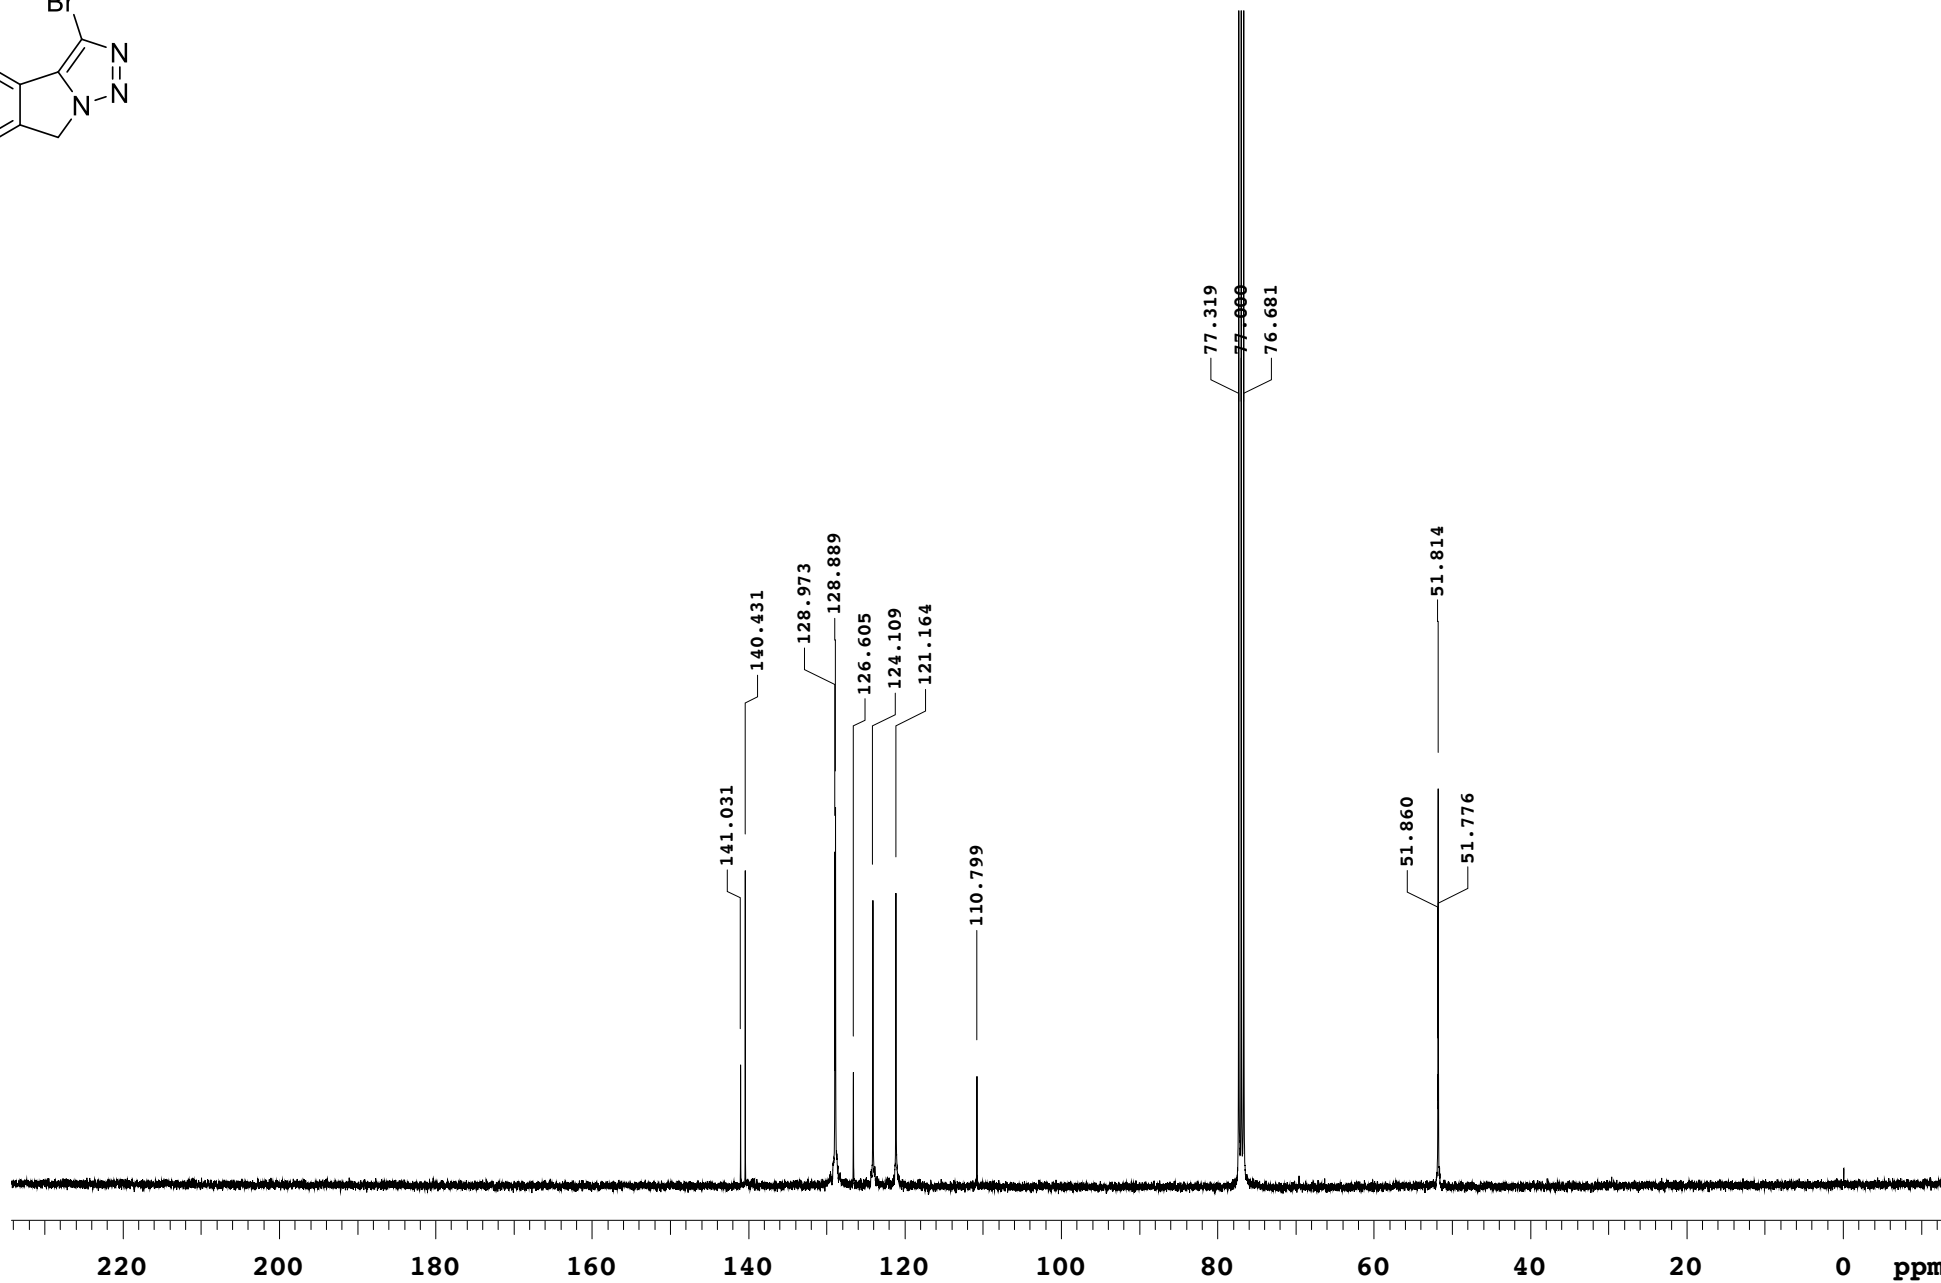

# 1-Bromo-6,7-dihydro-5H-benzo[*c*][1,2,3]triazolo[1,5-*a*]azepine (26).

<sup>1</sup>H NMR

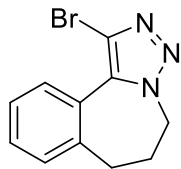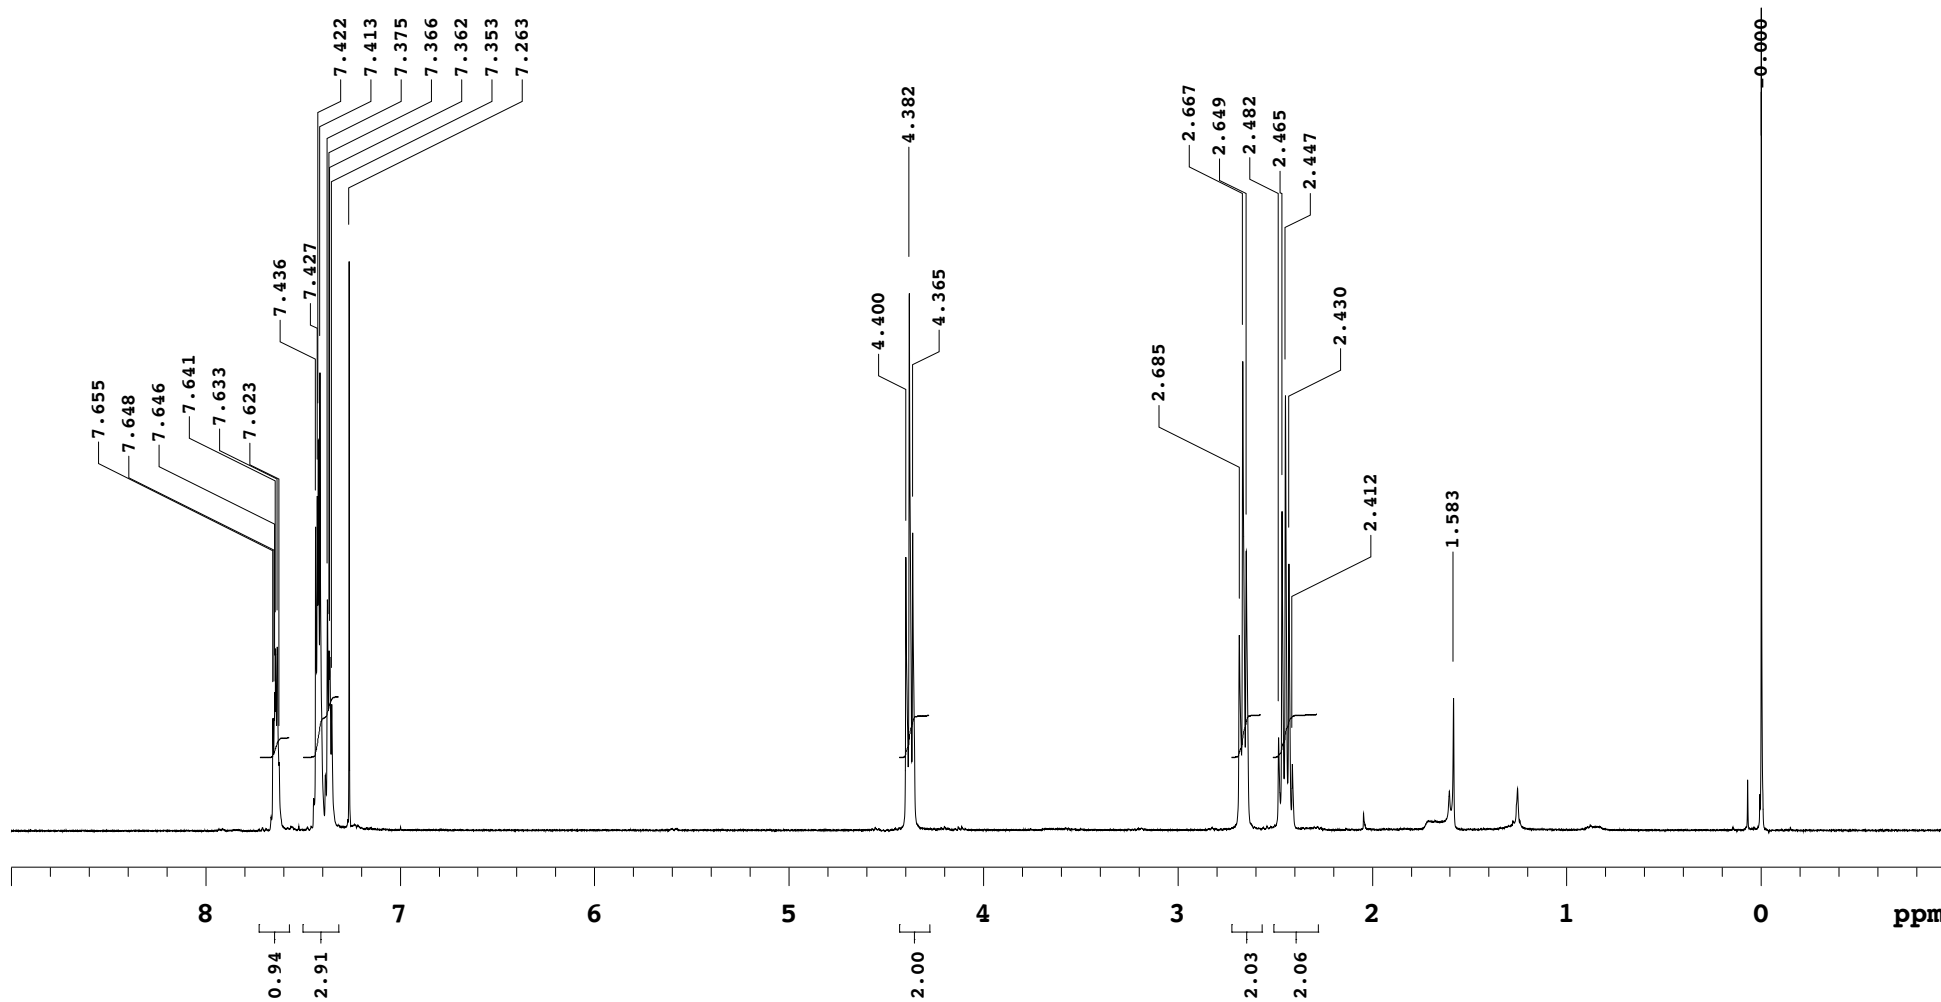



# 1-Bromo-6,7-dihydro-5H-benzo[*c*][1,2,3]triazolo[1,5-*a*]azepine (26).

<sup>13</sup>C NMR

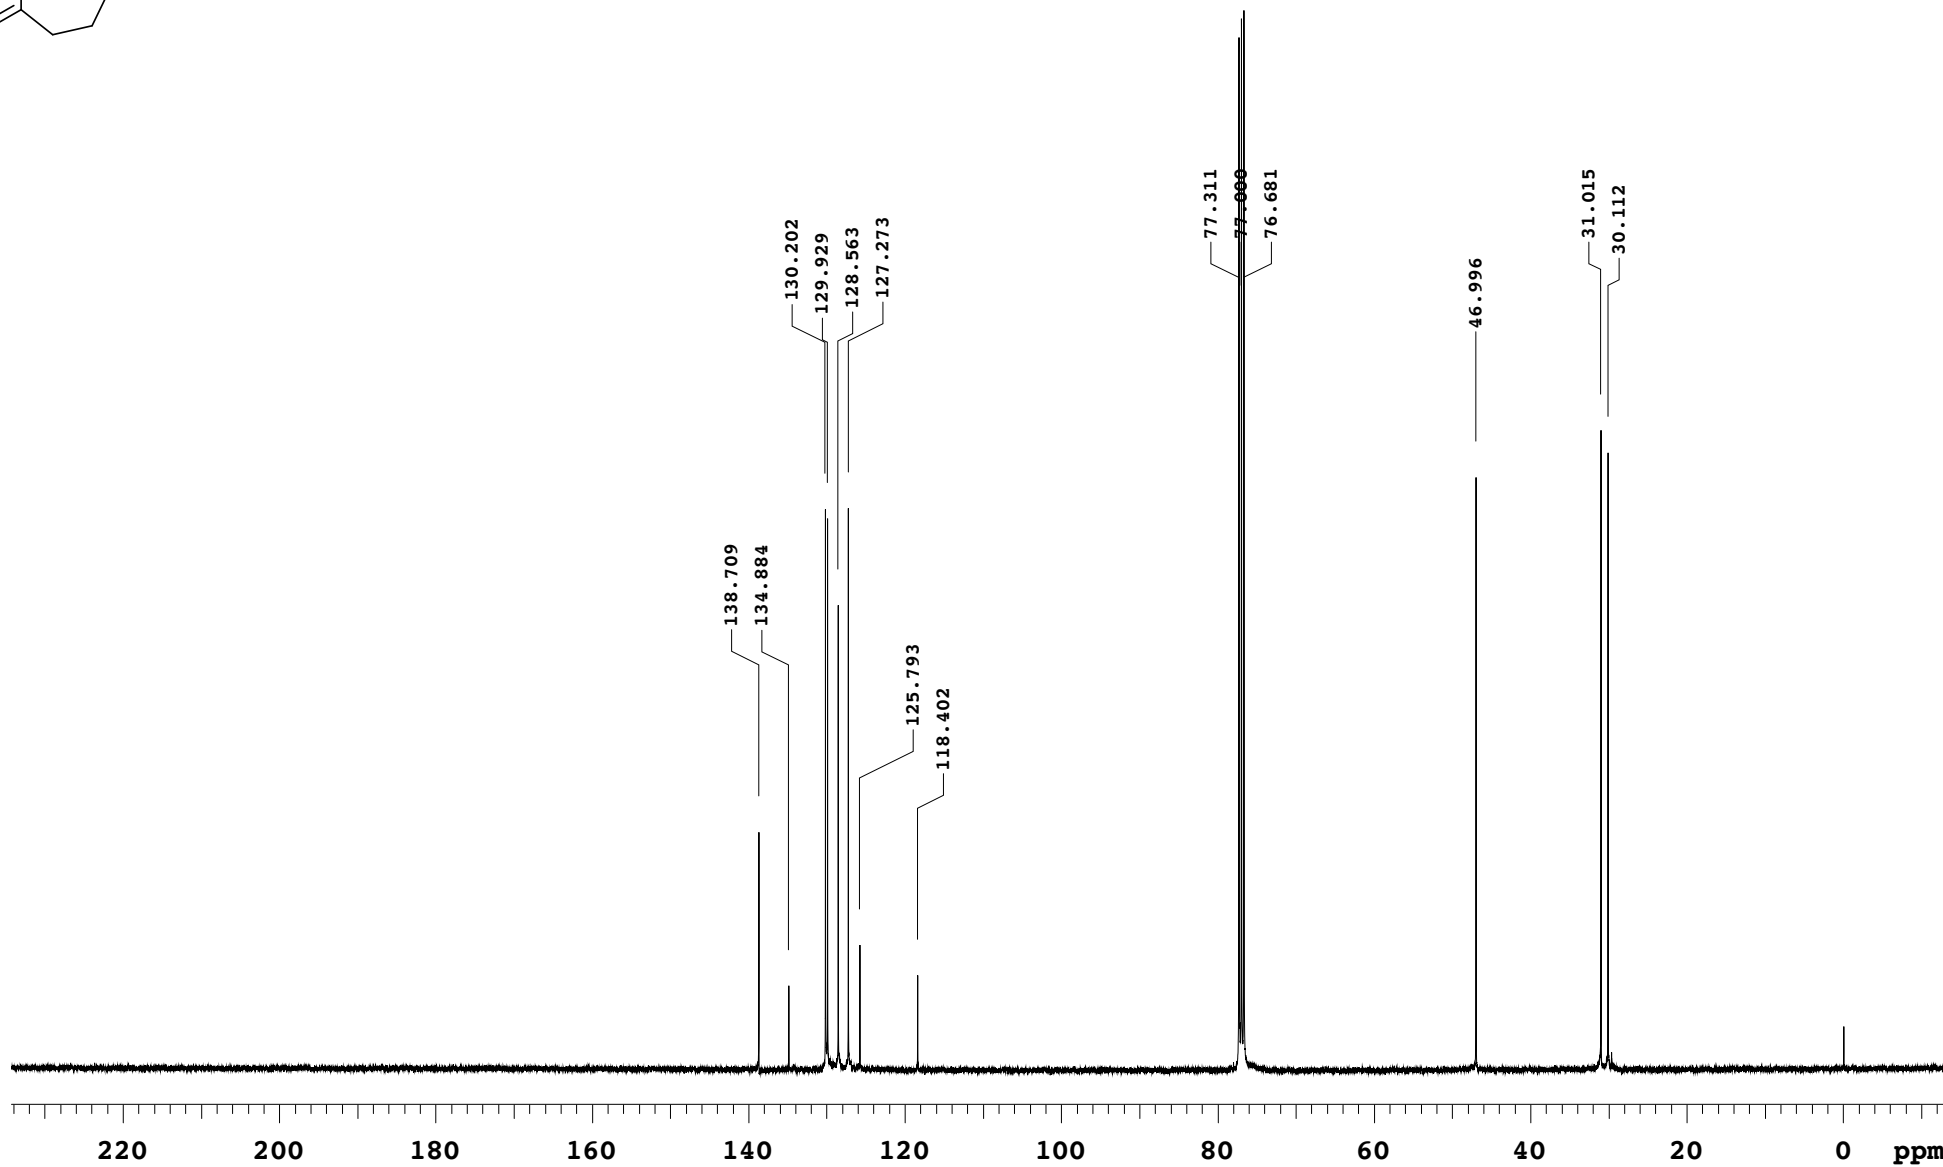

# 1-Bromo-5,6-dihydrobenzo[*f*][1,2,3]triazolo[1,5-*d*][1,4]oxazepine (27).

<sup>1</sup>H NMR

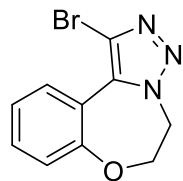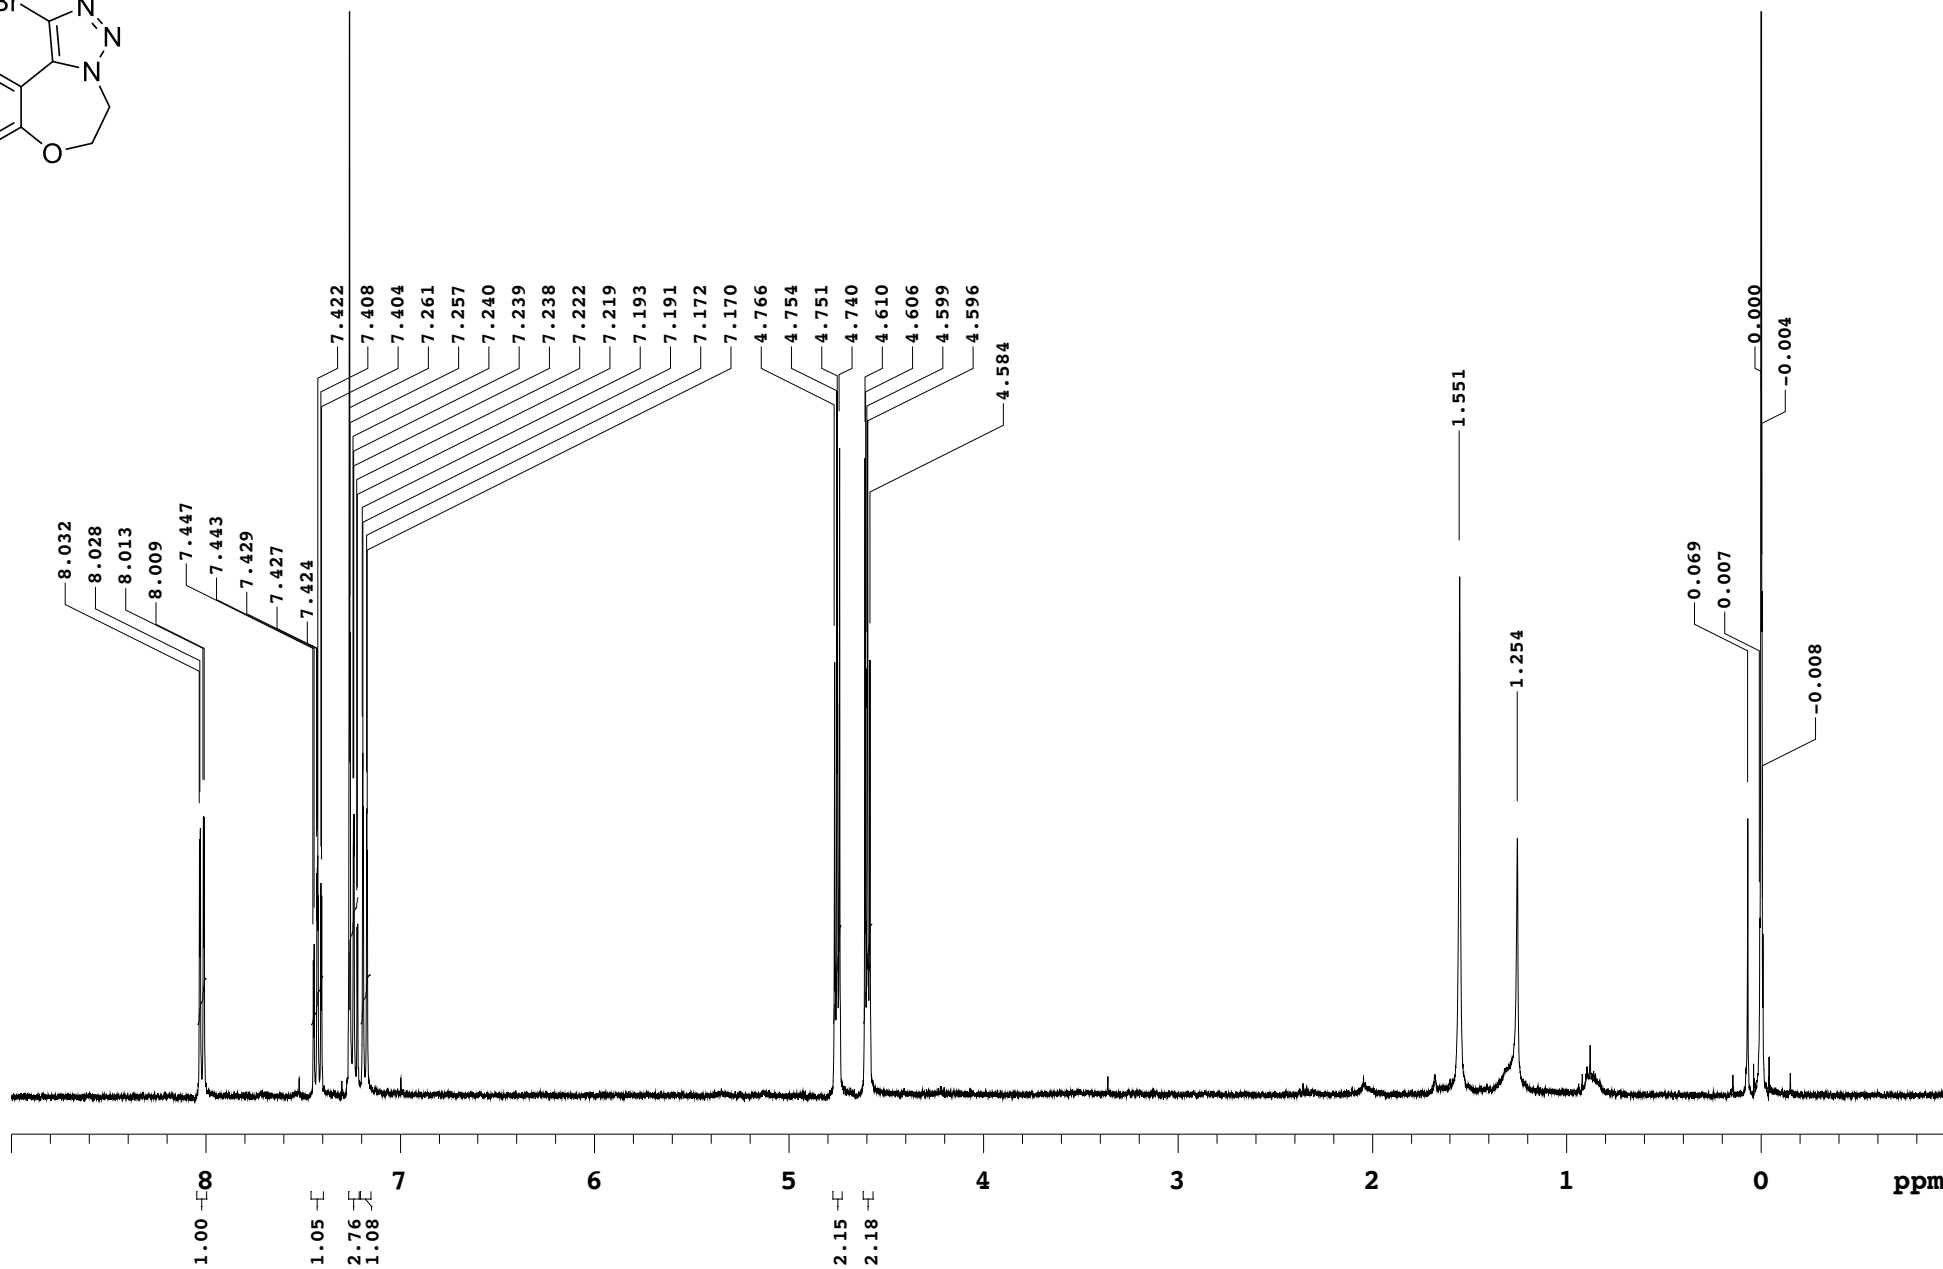

# 1-Bromo-5,6-dihydrobenzo[*f*][1,2,3]triazolo[1,5-*d*][1,4]oxazepine (28).

<sup>13</sup>C NMR

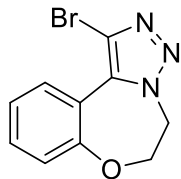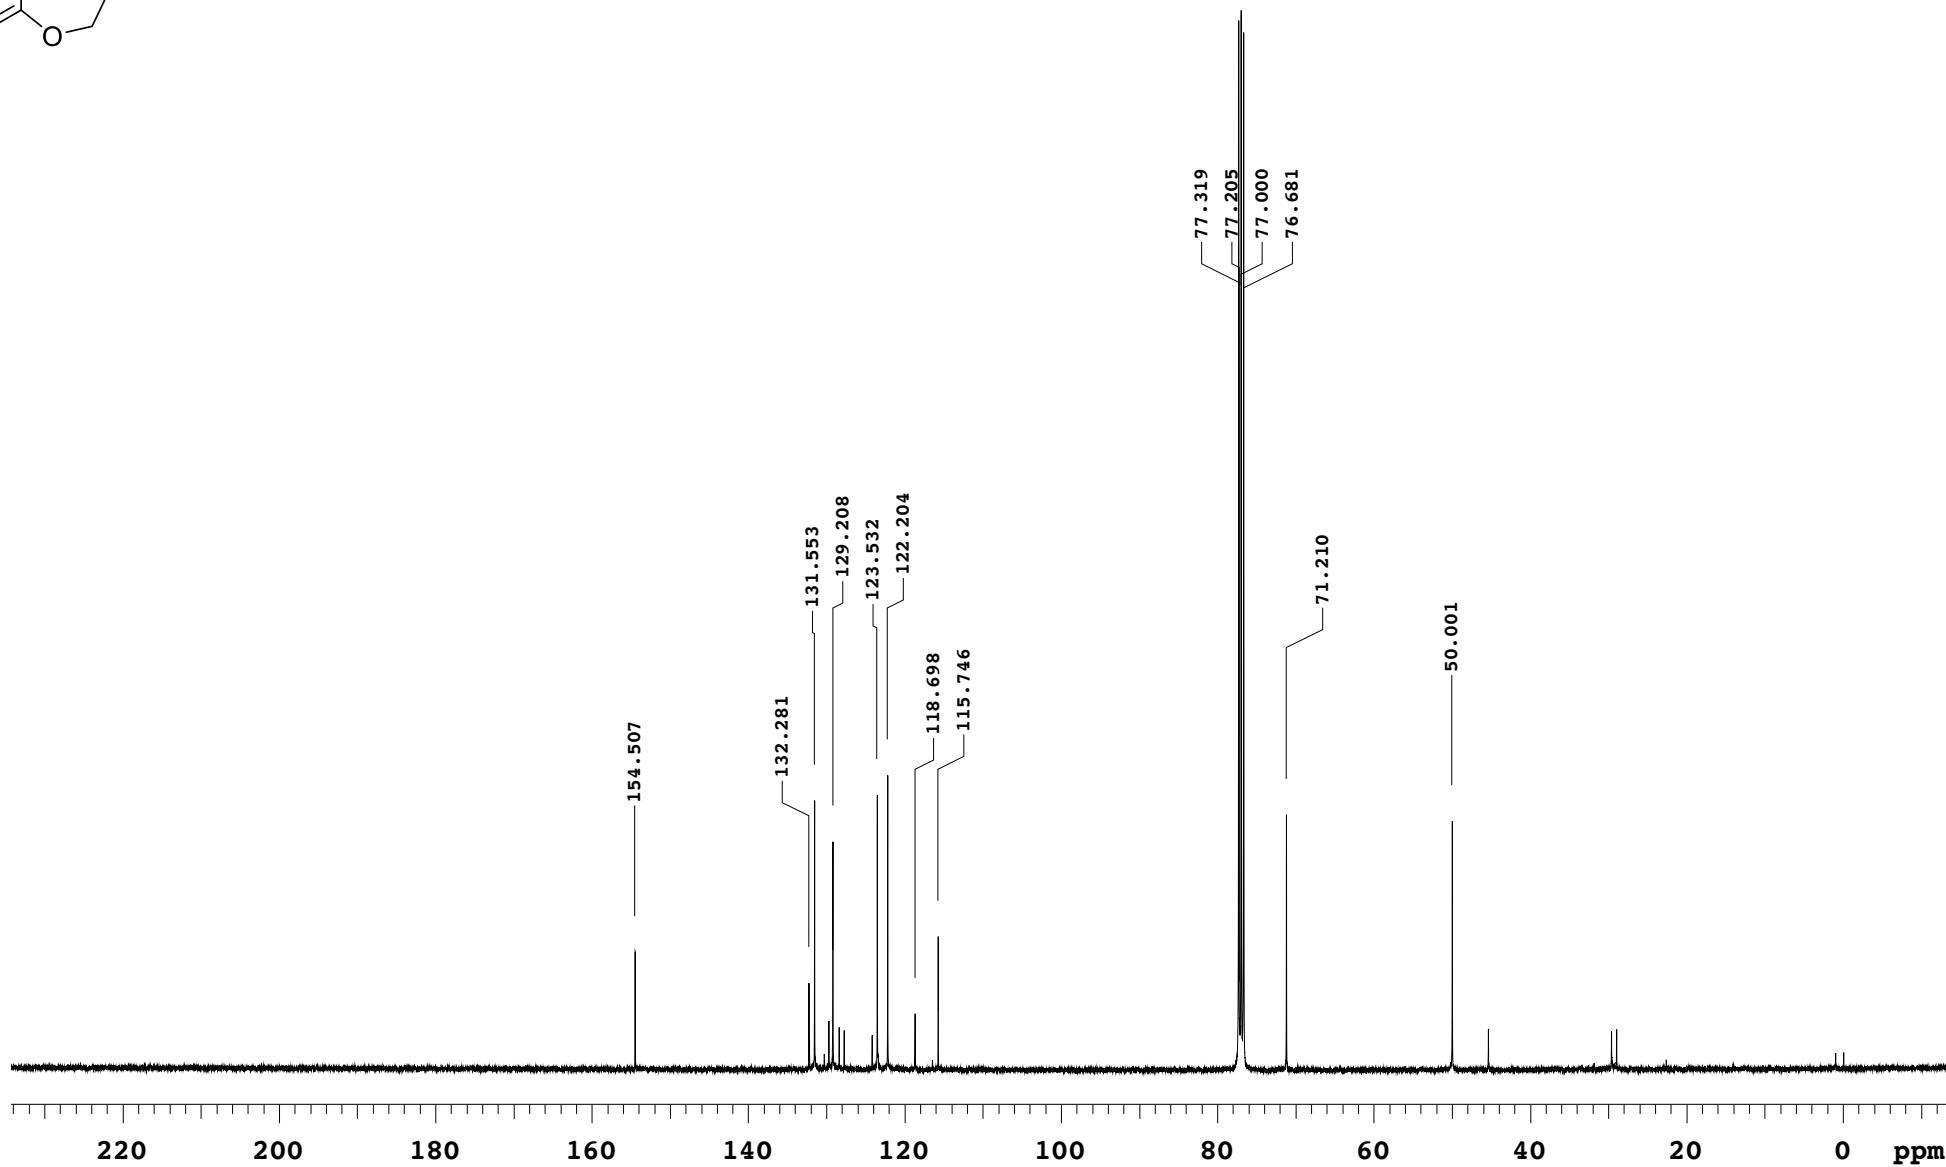

# 3-(5,6-Dihydro-[1,2,3]triazolo[5,1-*a*]isoquinolin-1-yl)propanoic acid.

<sup>1</sup>H NMR

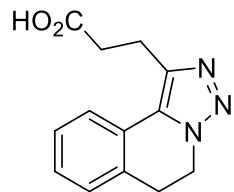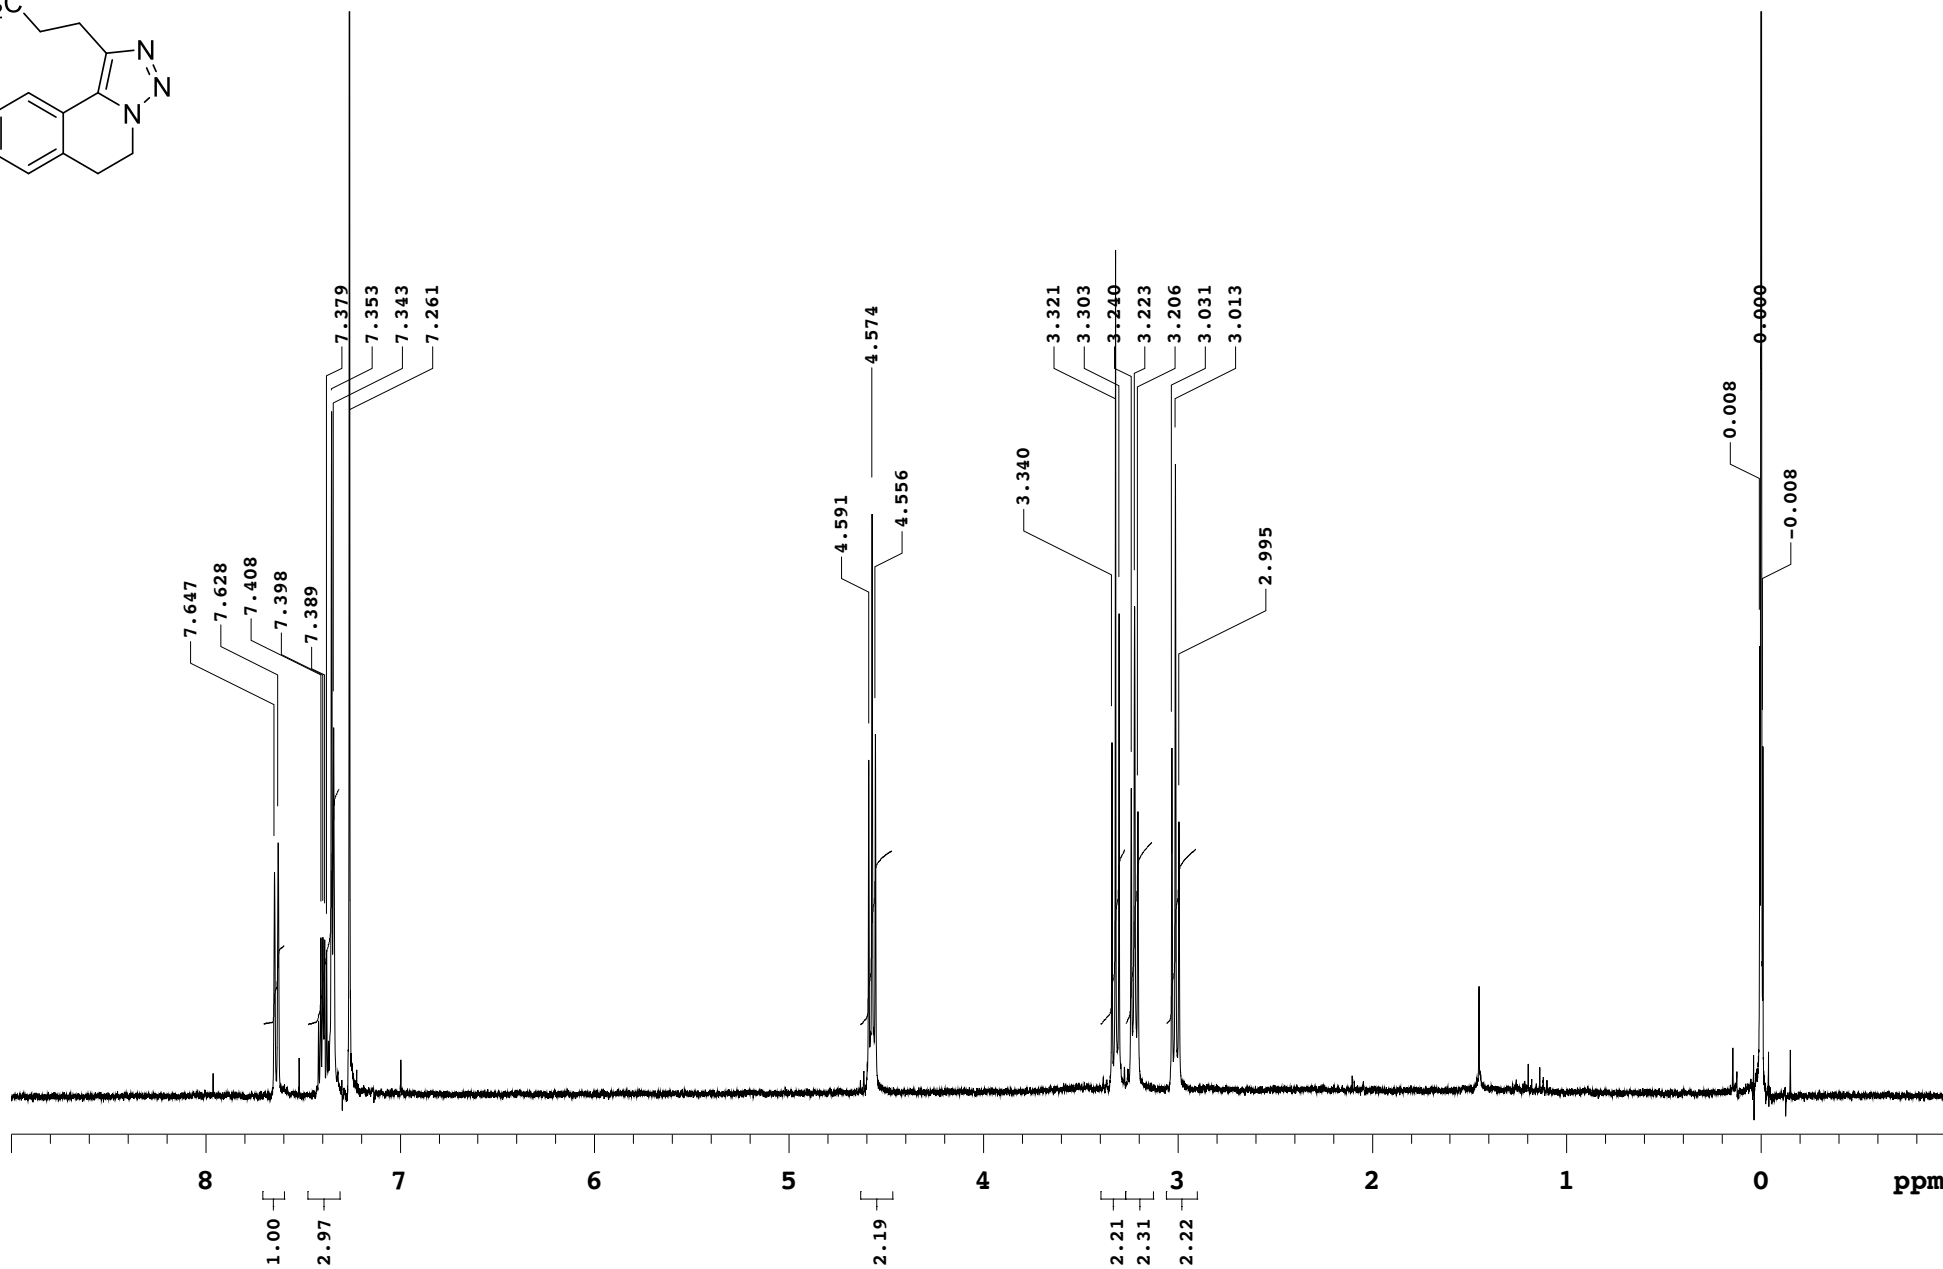

# 3,4,9,10-Tetrahydro-5H-1,2,10a-triazanaphtho[2,1,8-cde]azulen-5-one (28).

<sup>1</sup>H NMR

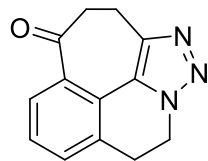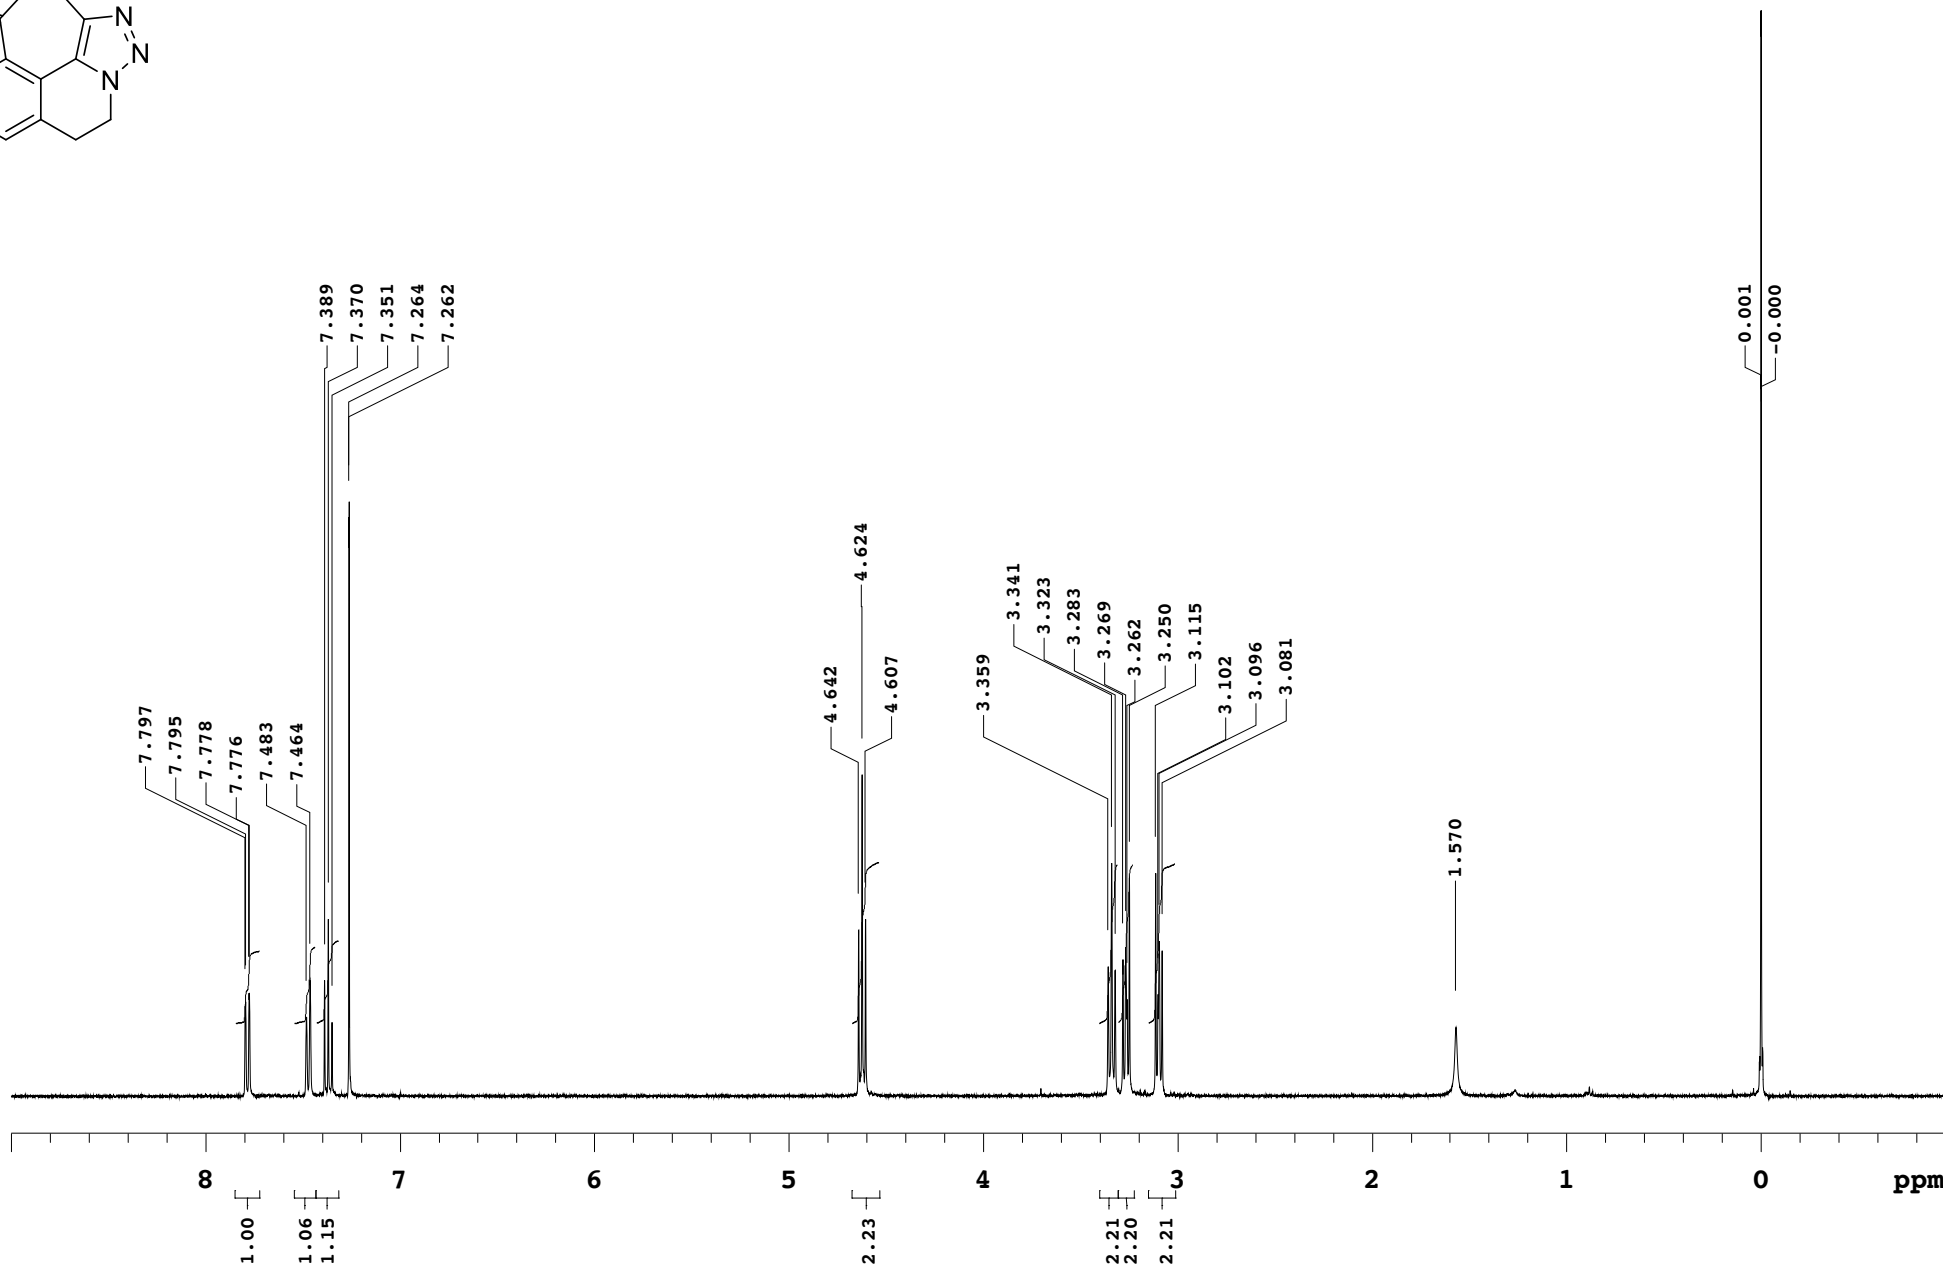

3,4,9,10-Tetrahydro-5H-1,2,10a-triazanaphtho[2,1,8-cde]azulen-5-one (28).

<sup>13</sup>C NMR

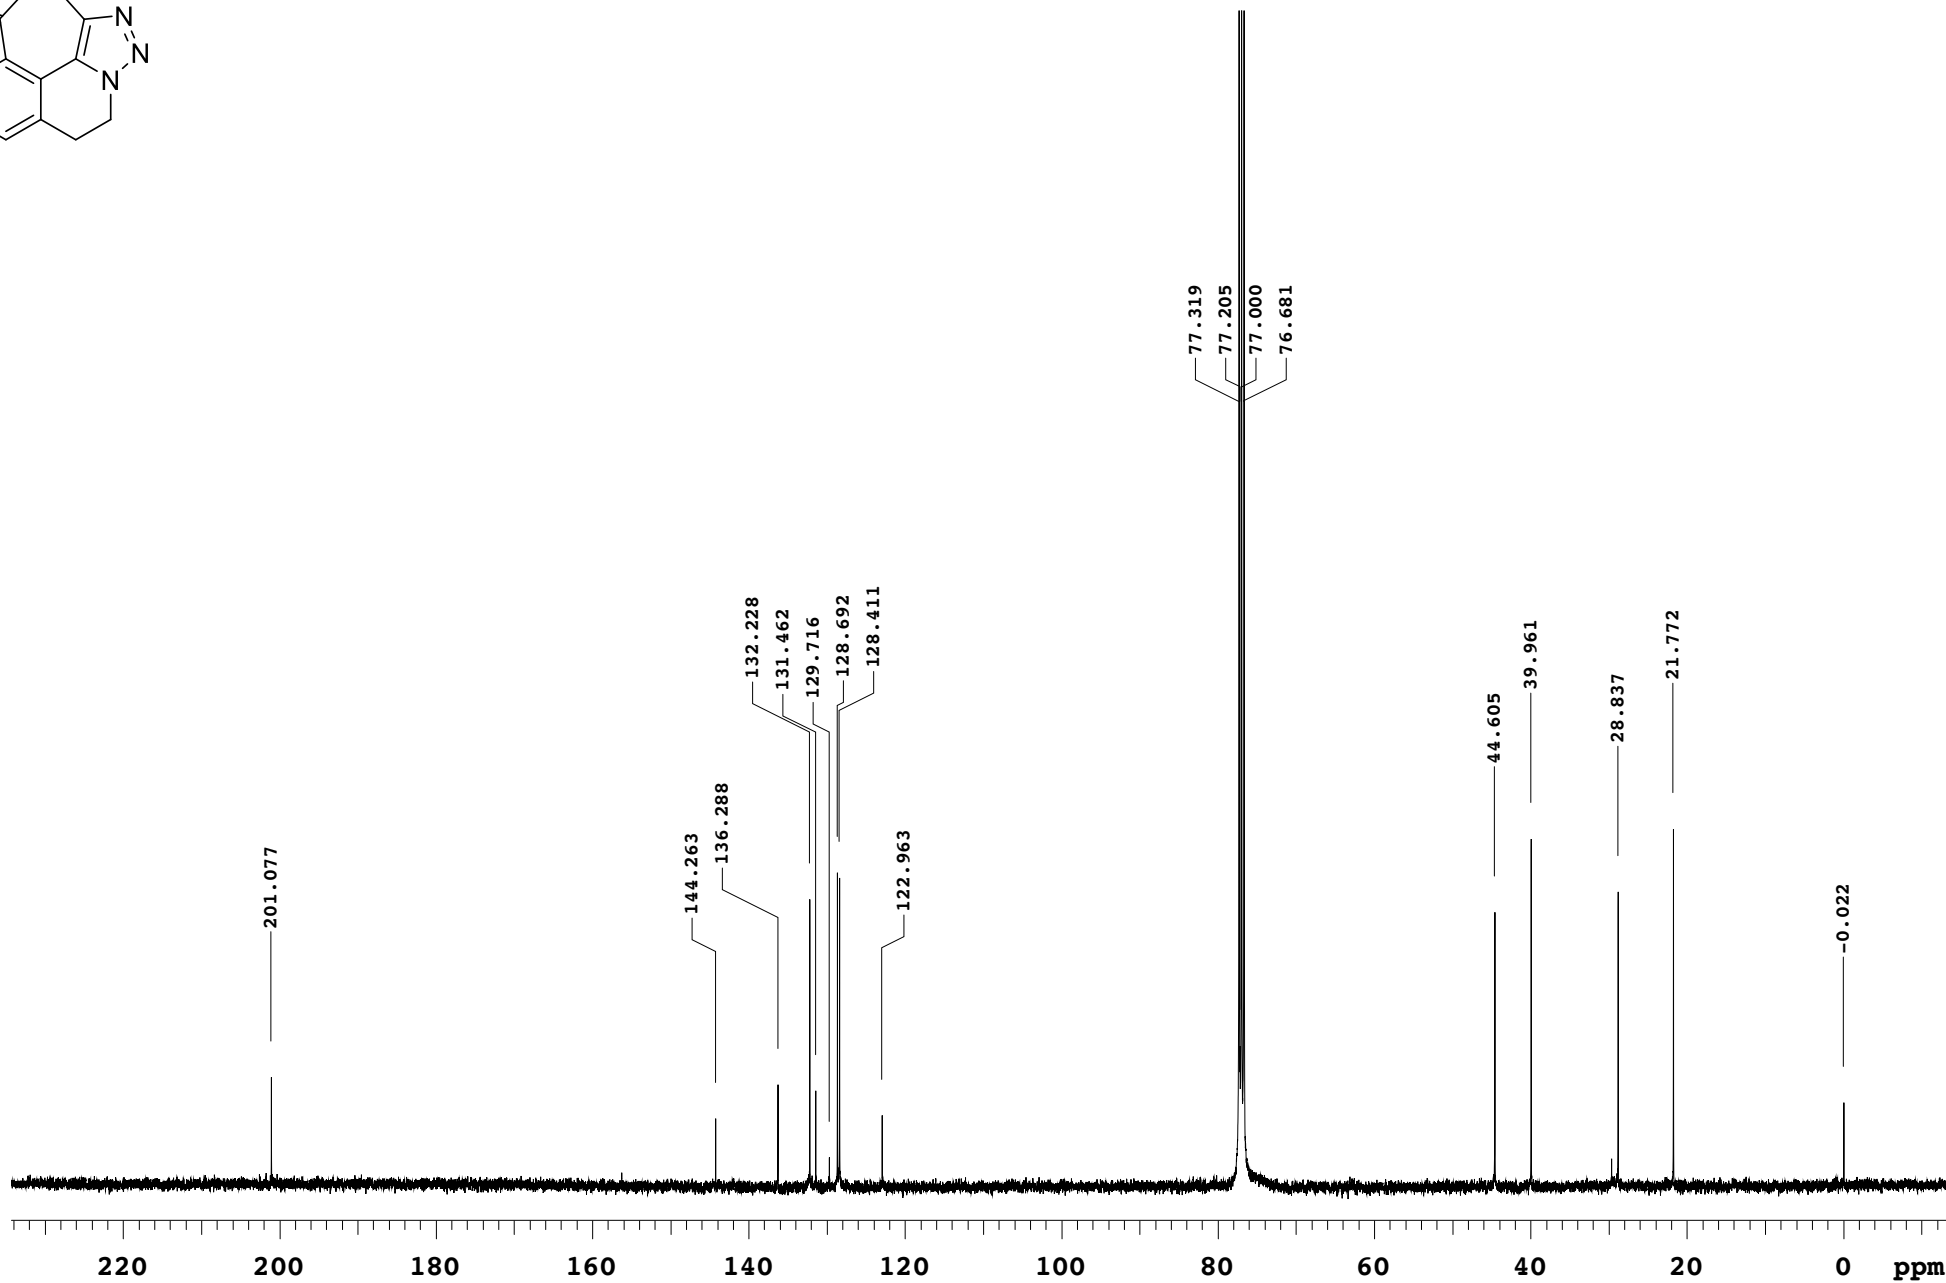

# 4-Methyl-3,4,9,10-tetrahydro-5H-1,2,10a-triazanaphtho[2,1,8-cde]azulen-5-one (29).

<sup>1</sup>H NMR

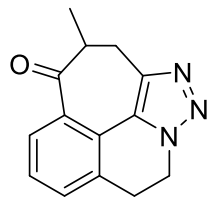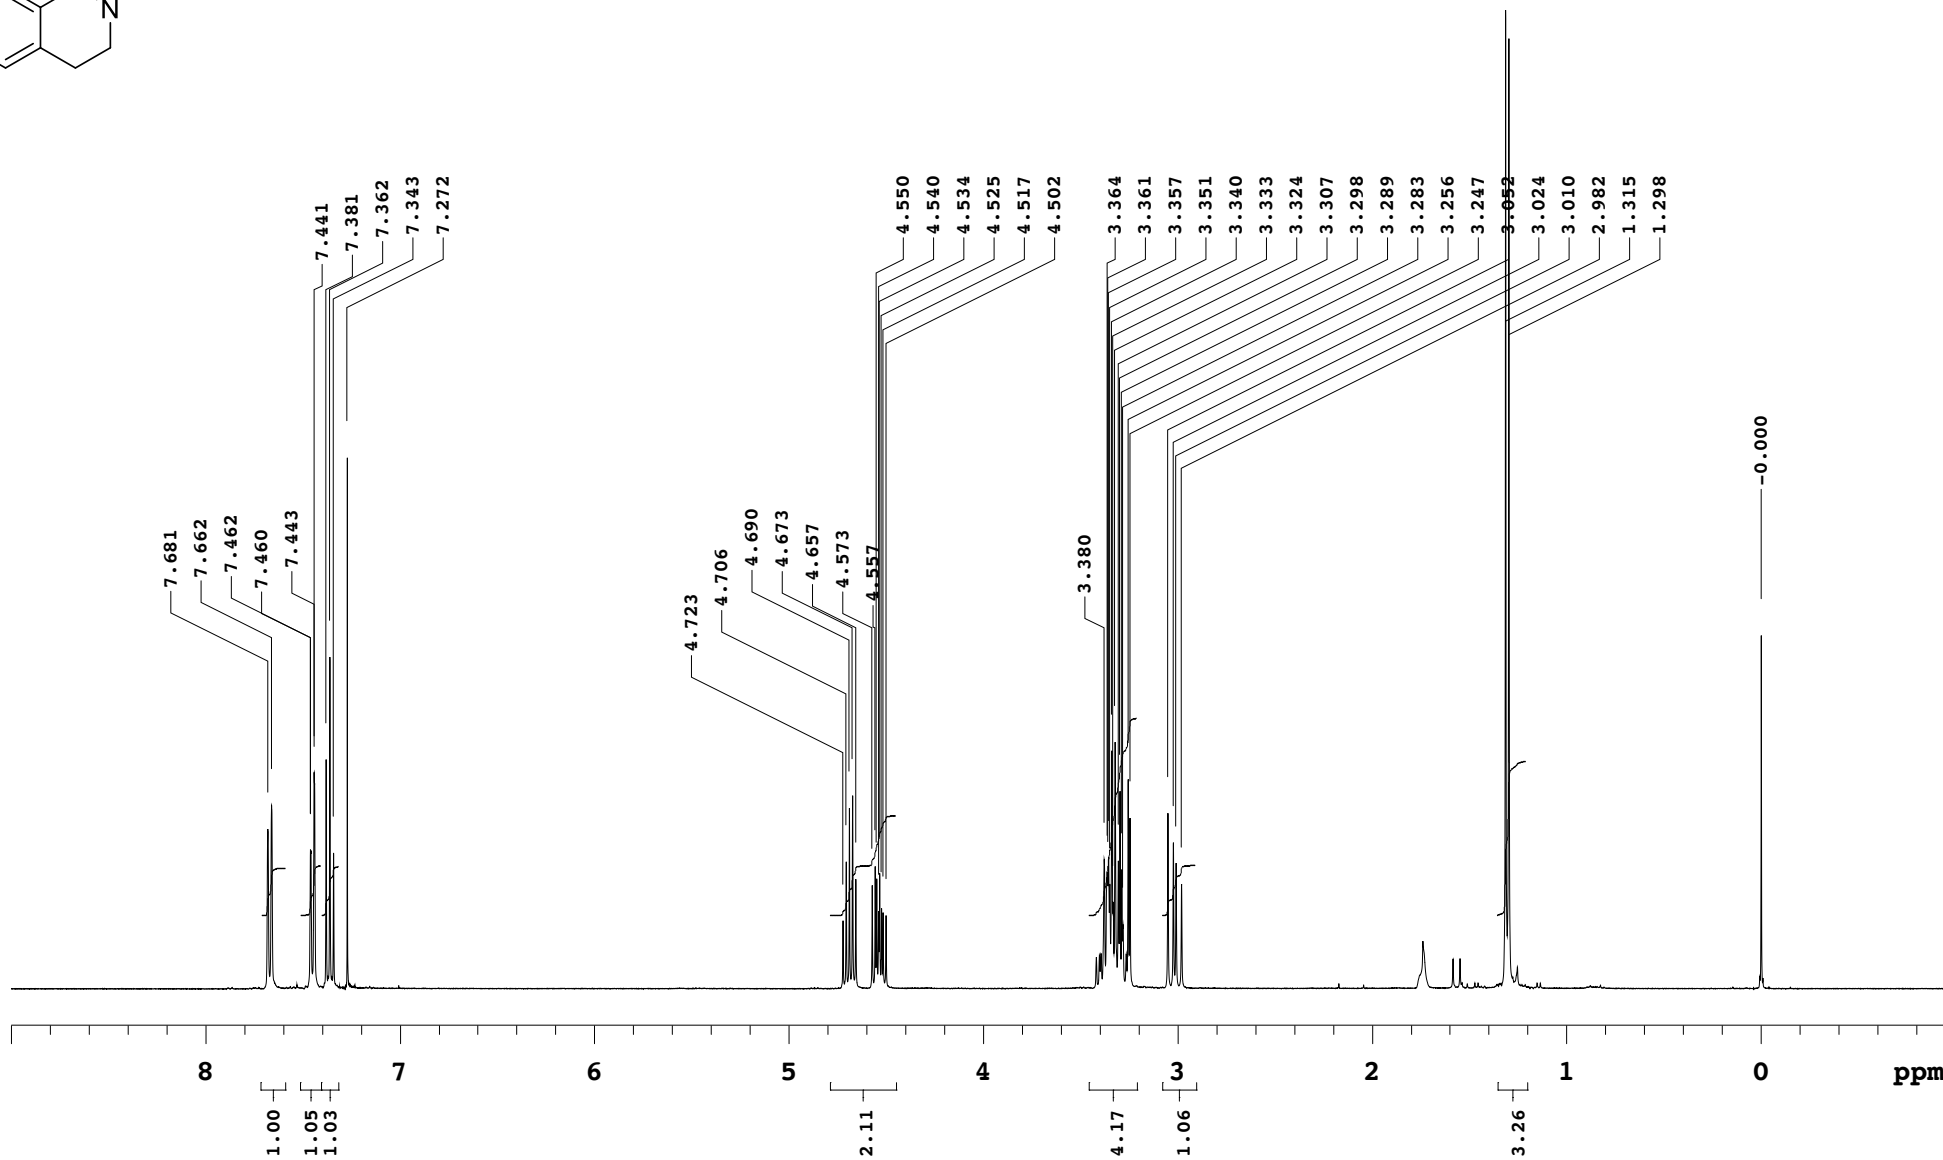

# 4-Methyl-3,4,9,10-tetrahydro-5H-1,2,10a-triazanaphtho[2,1,8-cde]azulen-5-one (29).

<sup>13</sup>C NMR

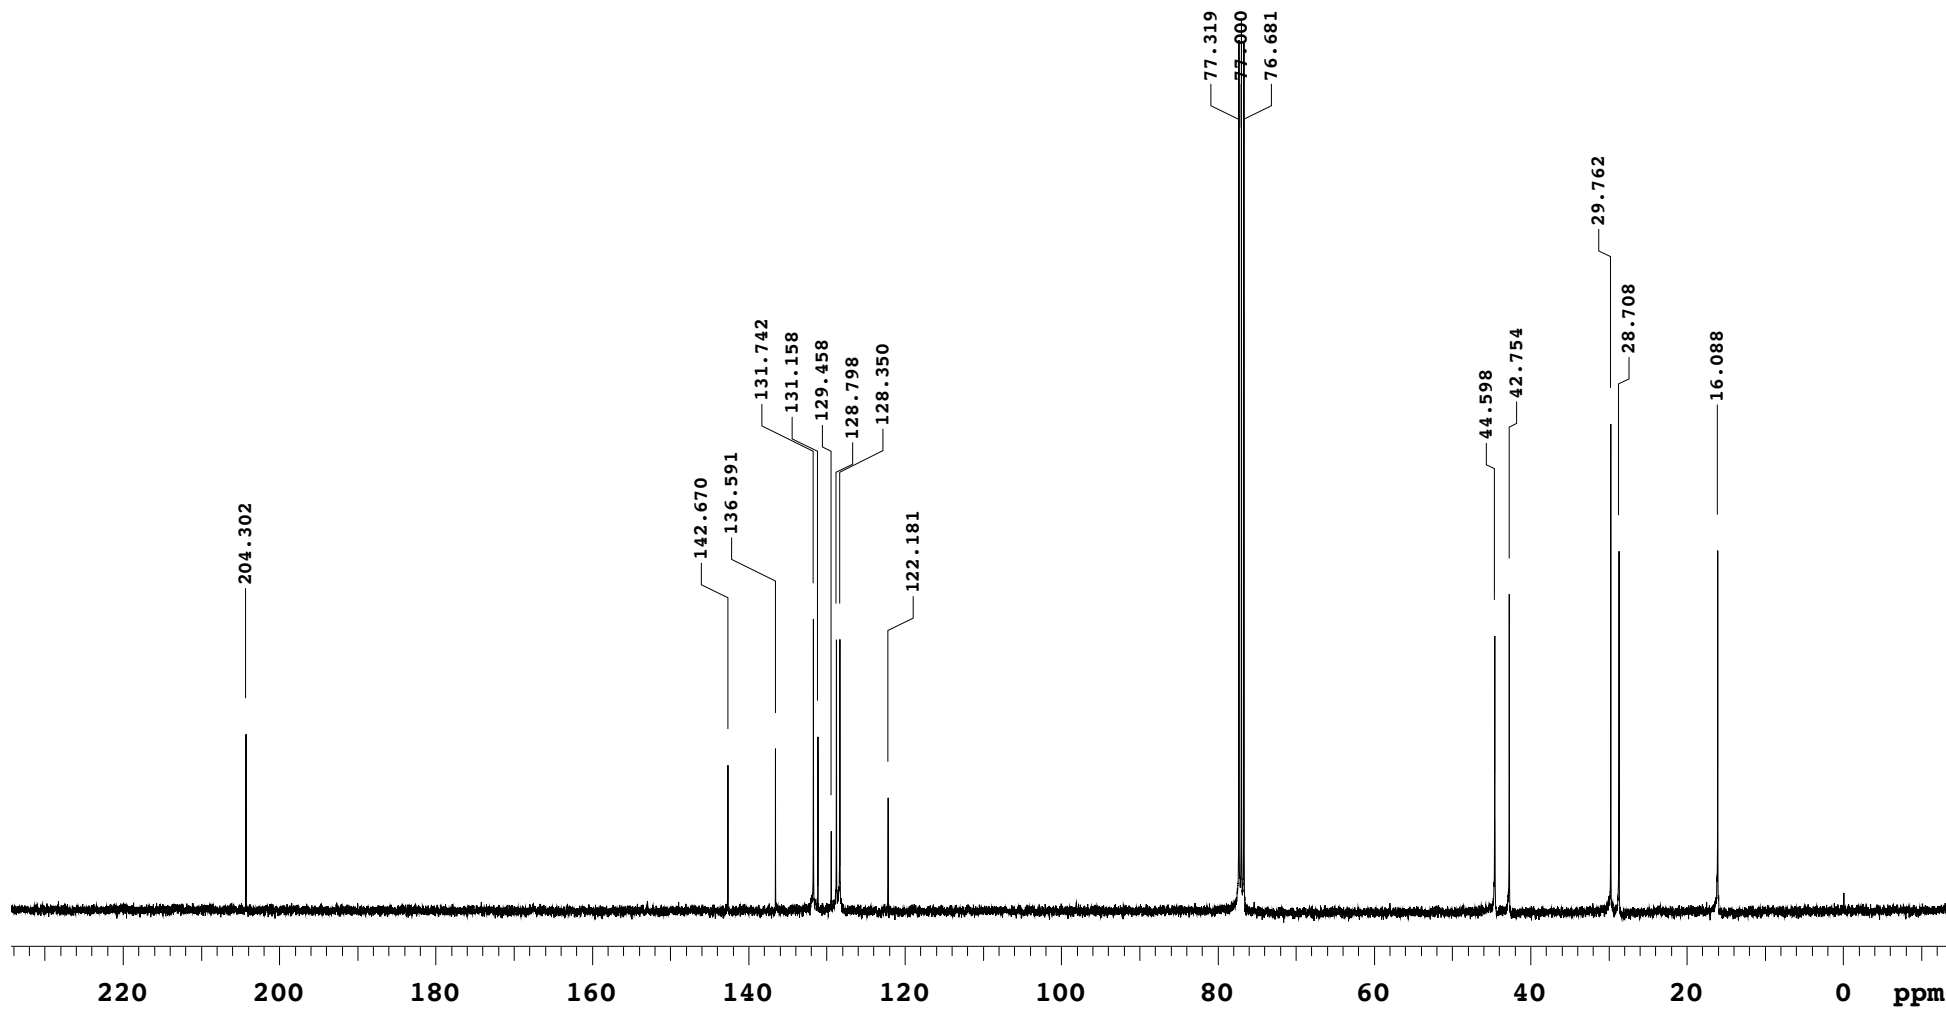



# 3-Methyl-3,4,9,10-tetrahydro-5H-1,2,10a-triazanaphtho[2,1,8-cde]azulen-5-one (30).

<sup>1</sup>H NMR

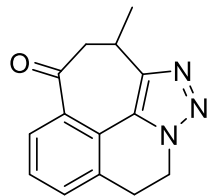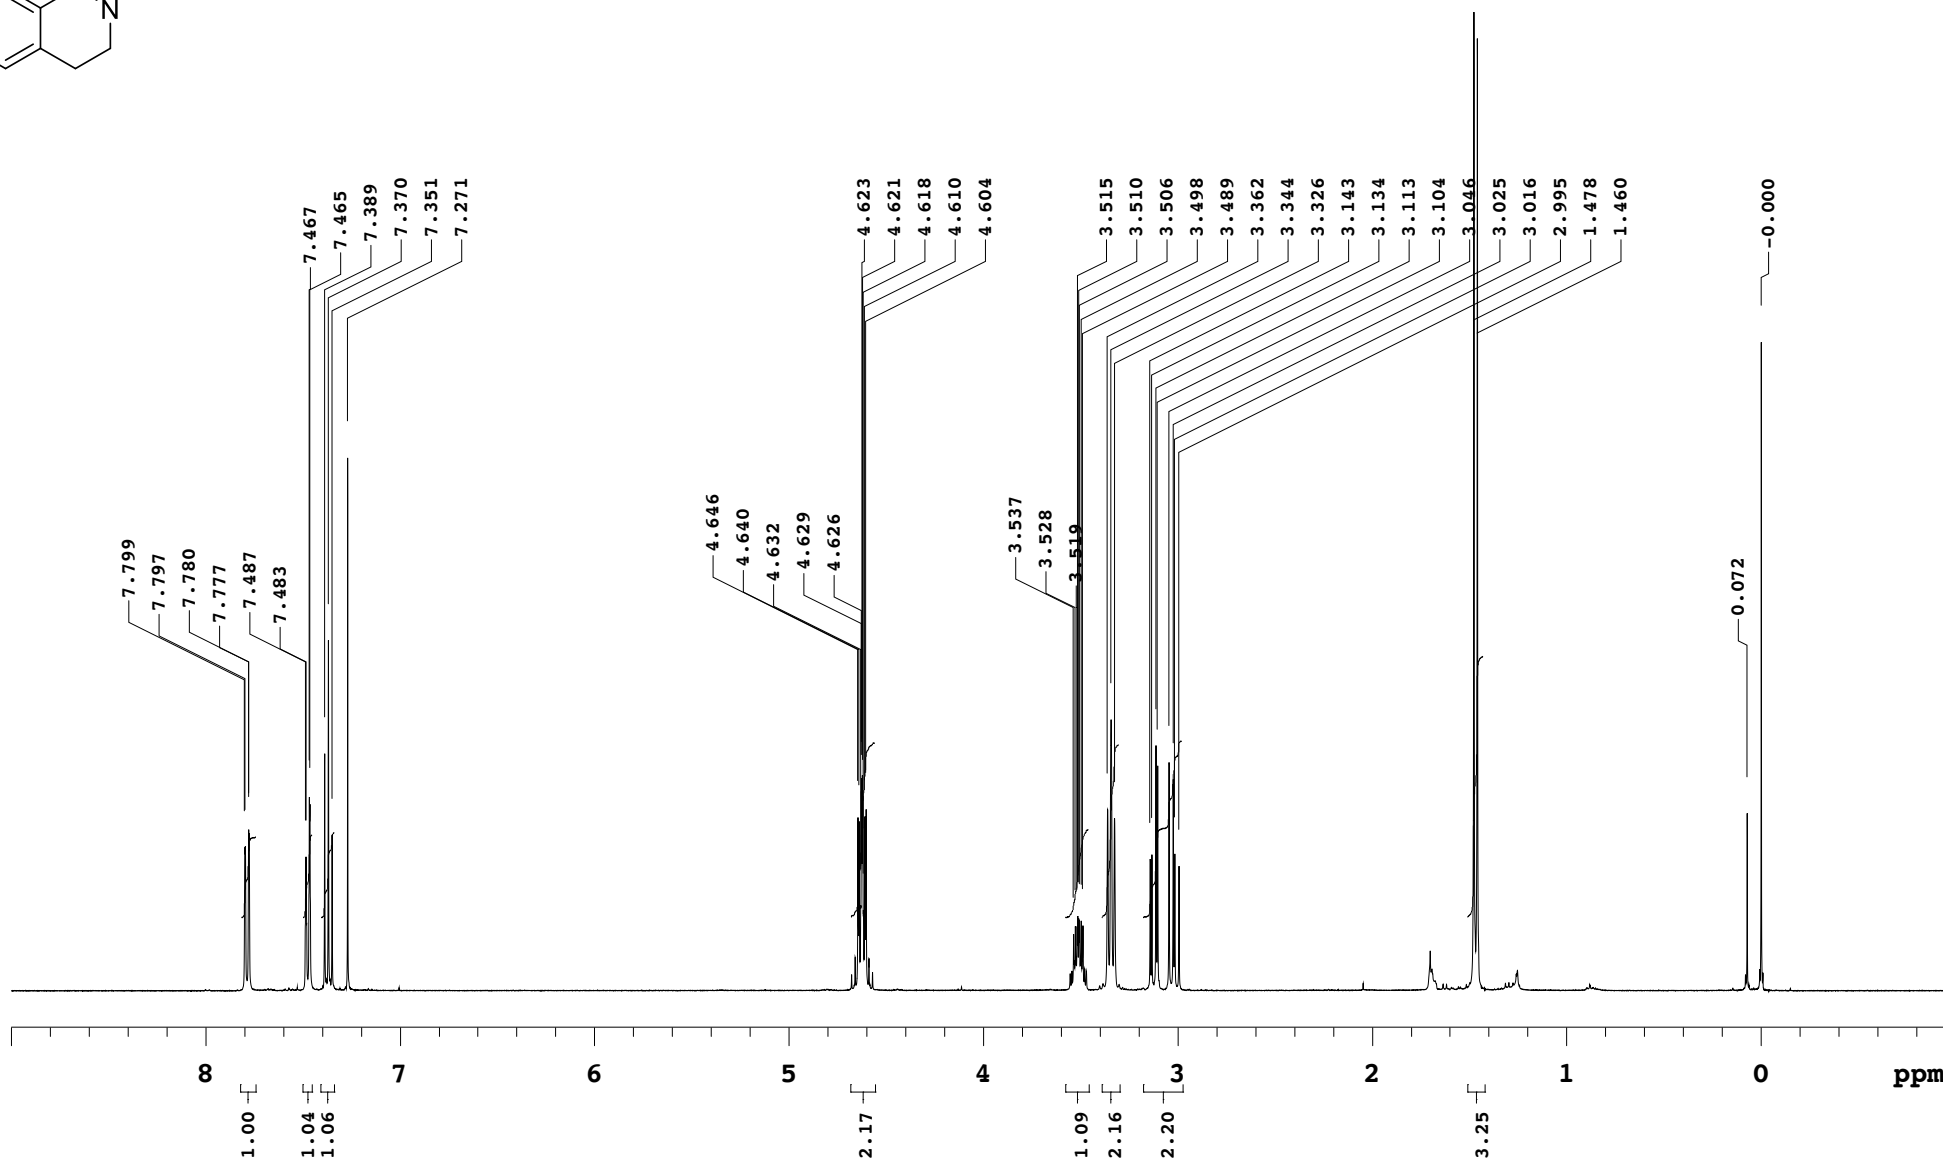

# 3-Methyl-3,4,9,10-tetrahydro-5H-1,2,10a-triazanaphtho[2,1,8-cde]azulen-5-one (30).

<sup>13</sup>C NMR

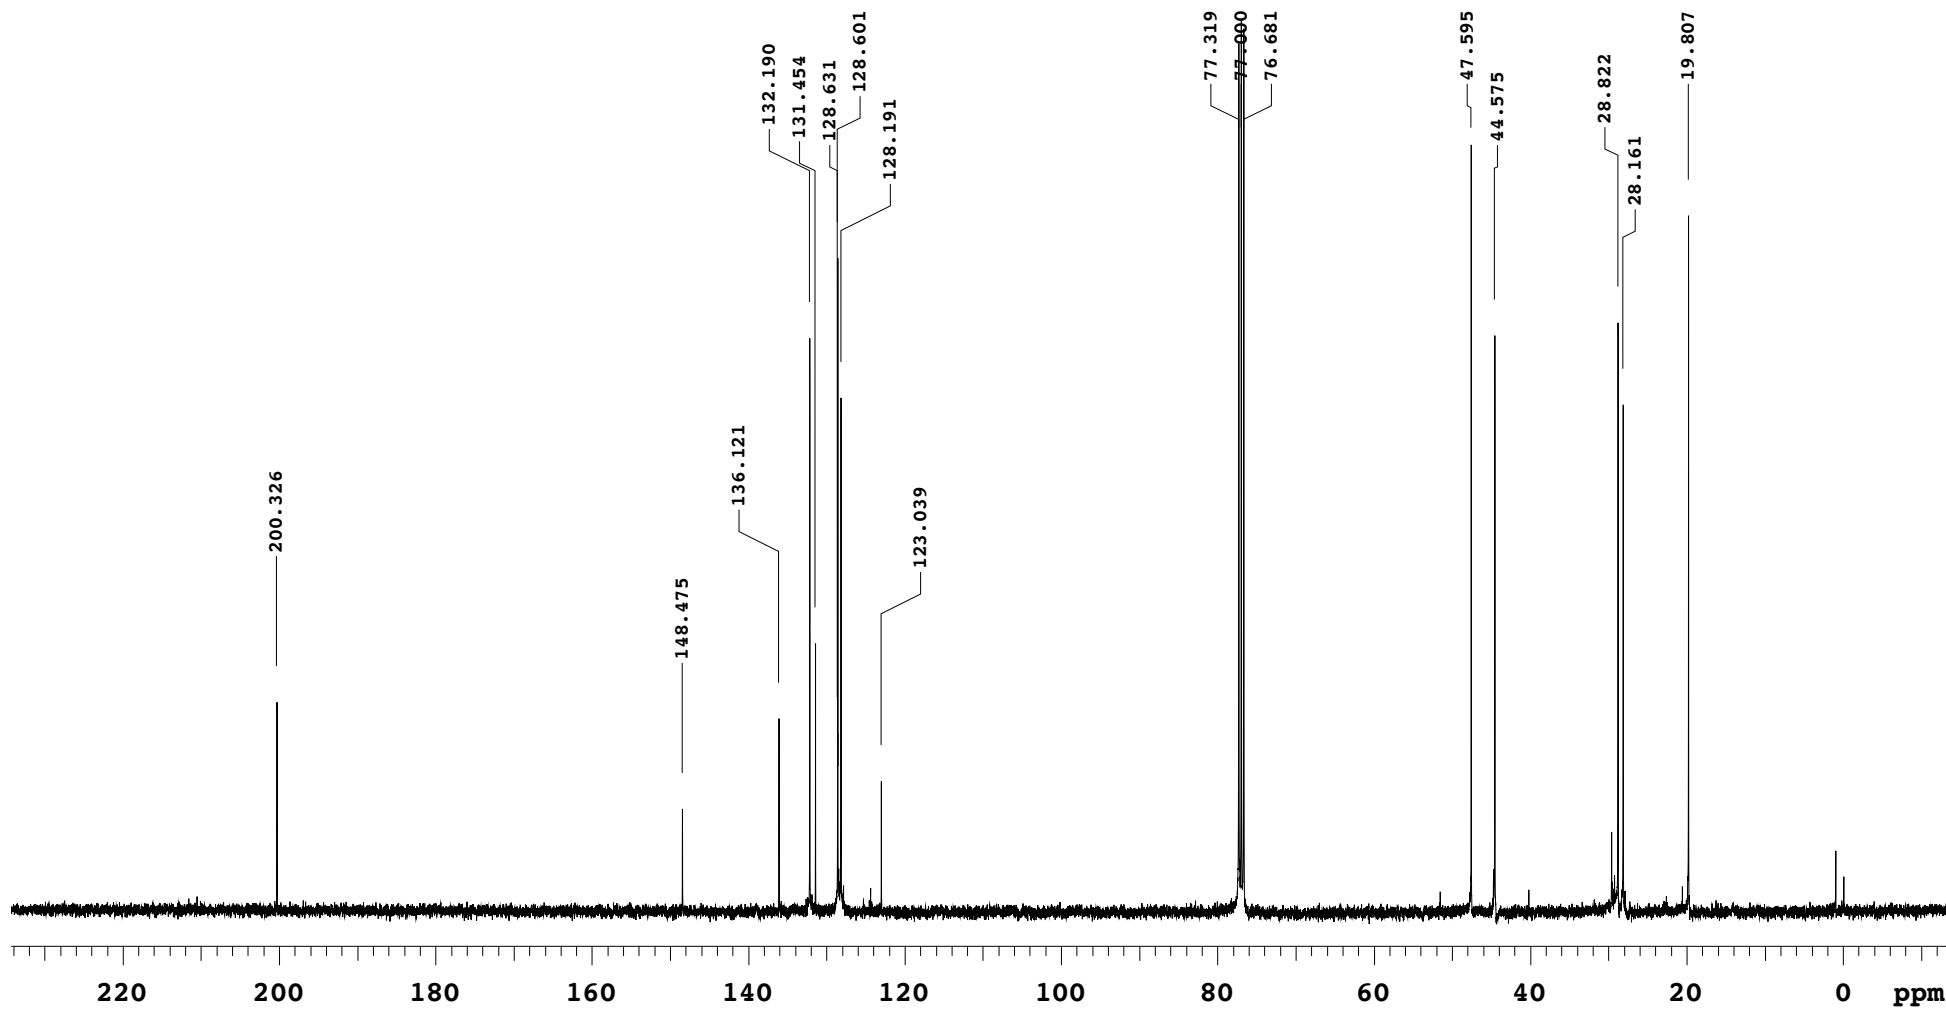

# 11,12-Dihydro-7H-1,2,12a-triazacyclopenta[gh]pleiaden-7-one (33).

<sup>1</sup>H NMR

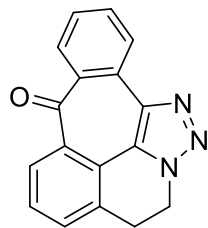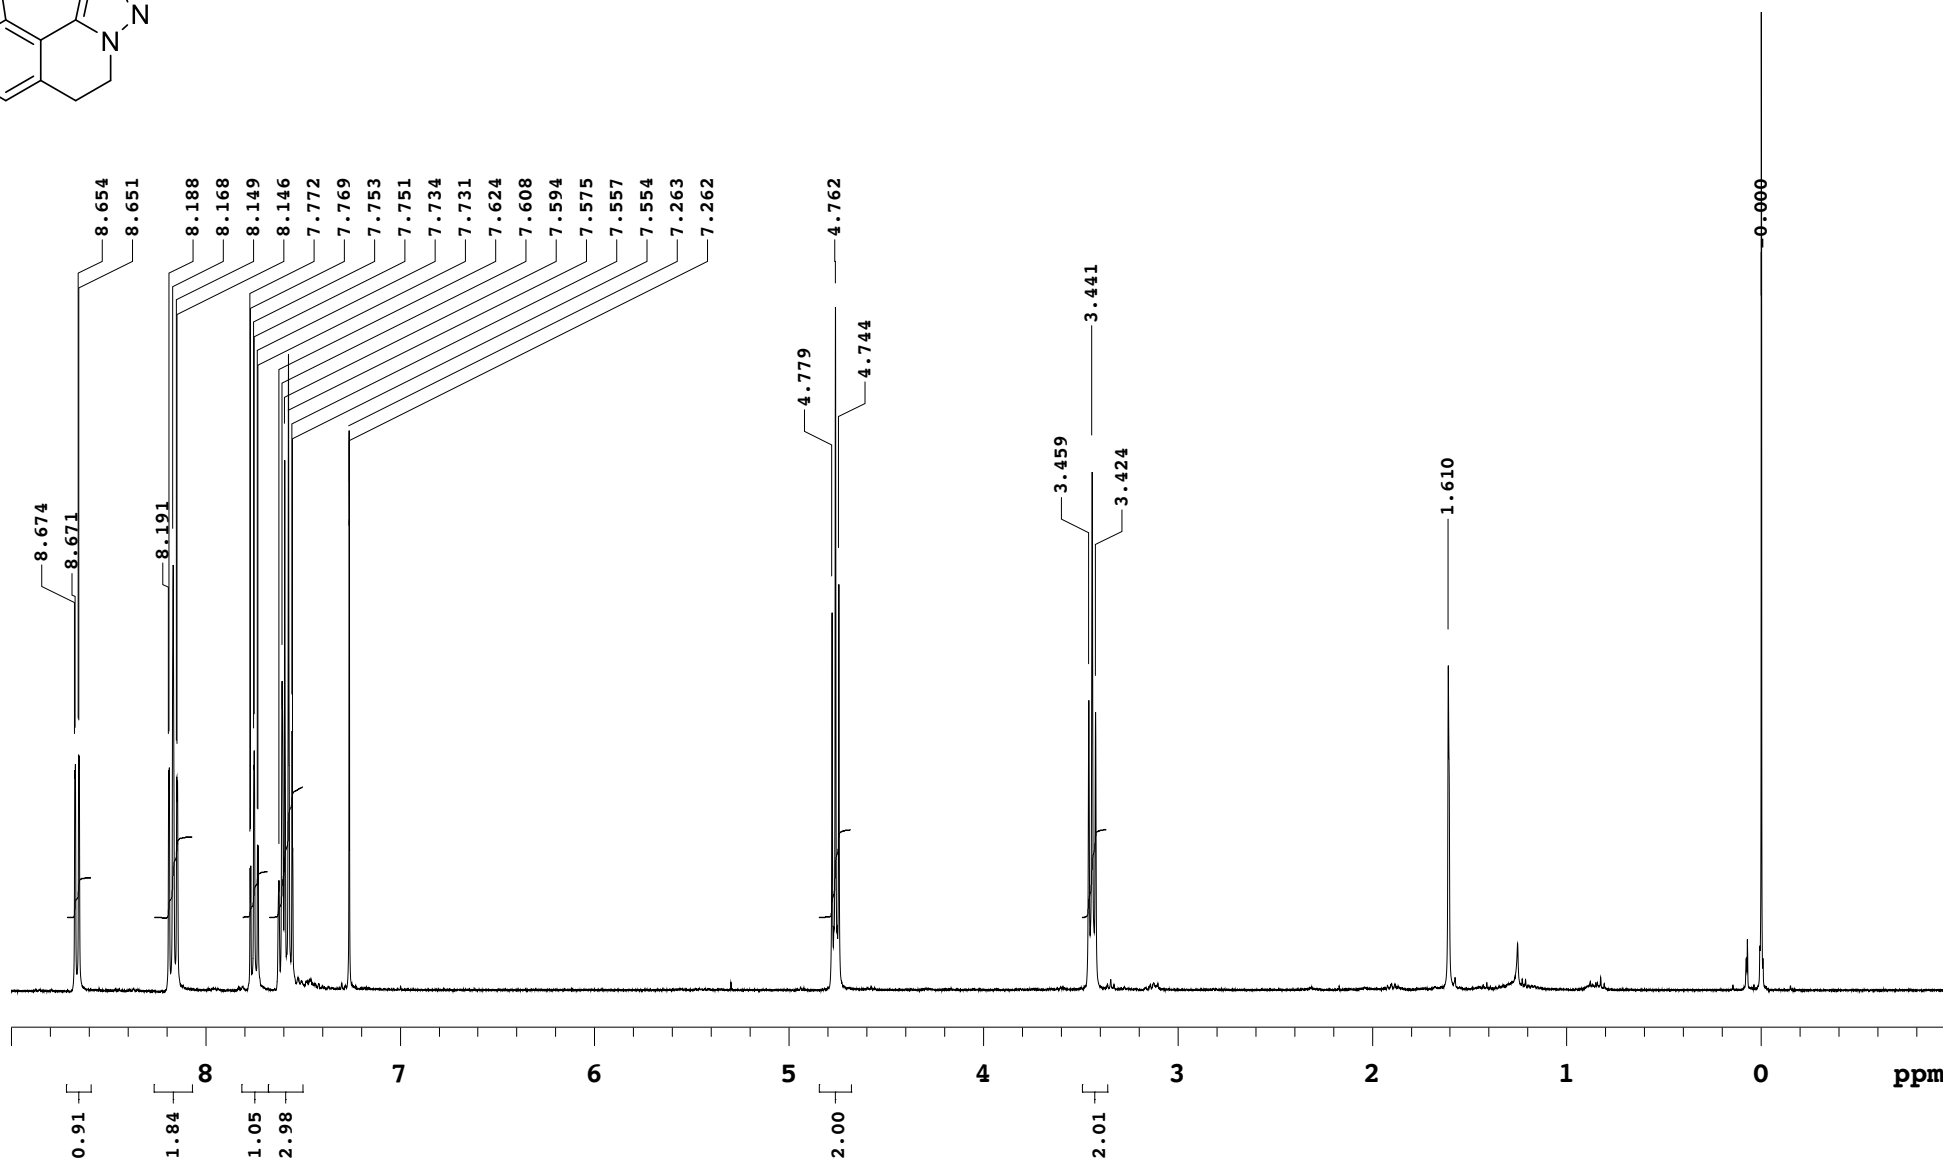

# 11,12-Dihydro-7H-1,2,12a-triazacyclopenta[gh]pleiaden-7-one (33).

<sup>13</sup>C NMR

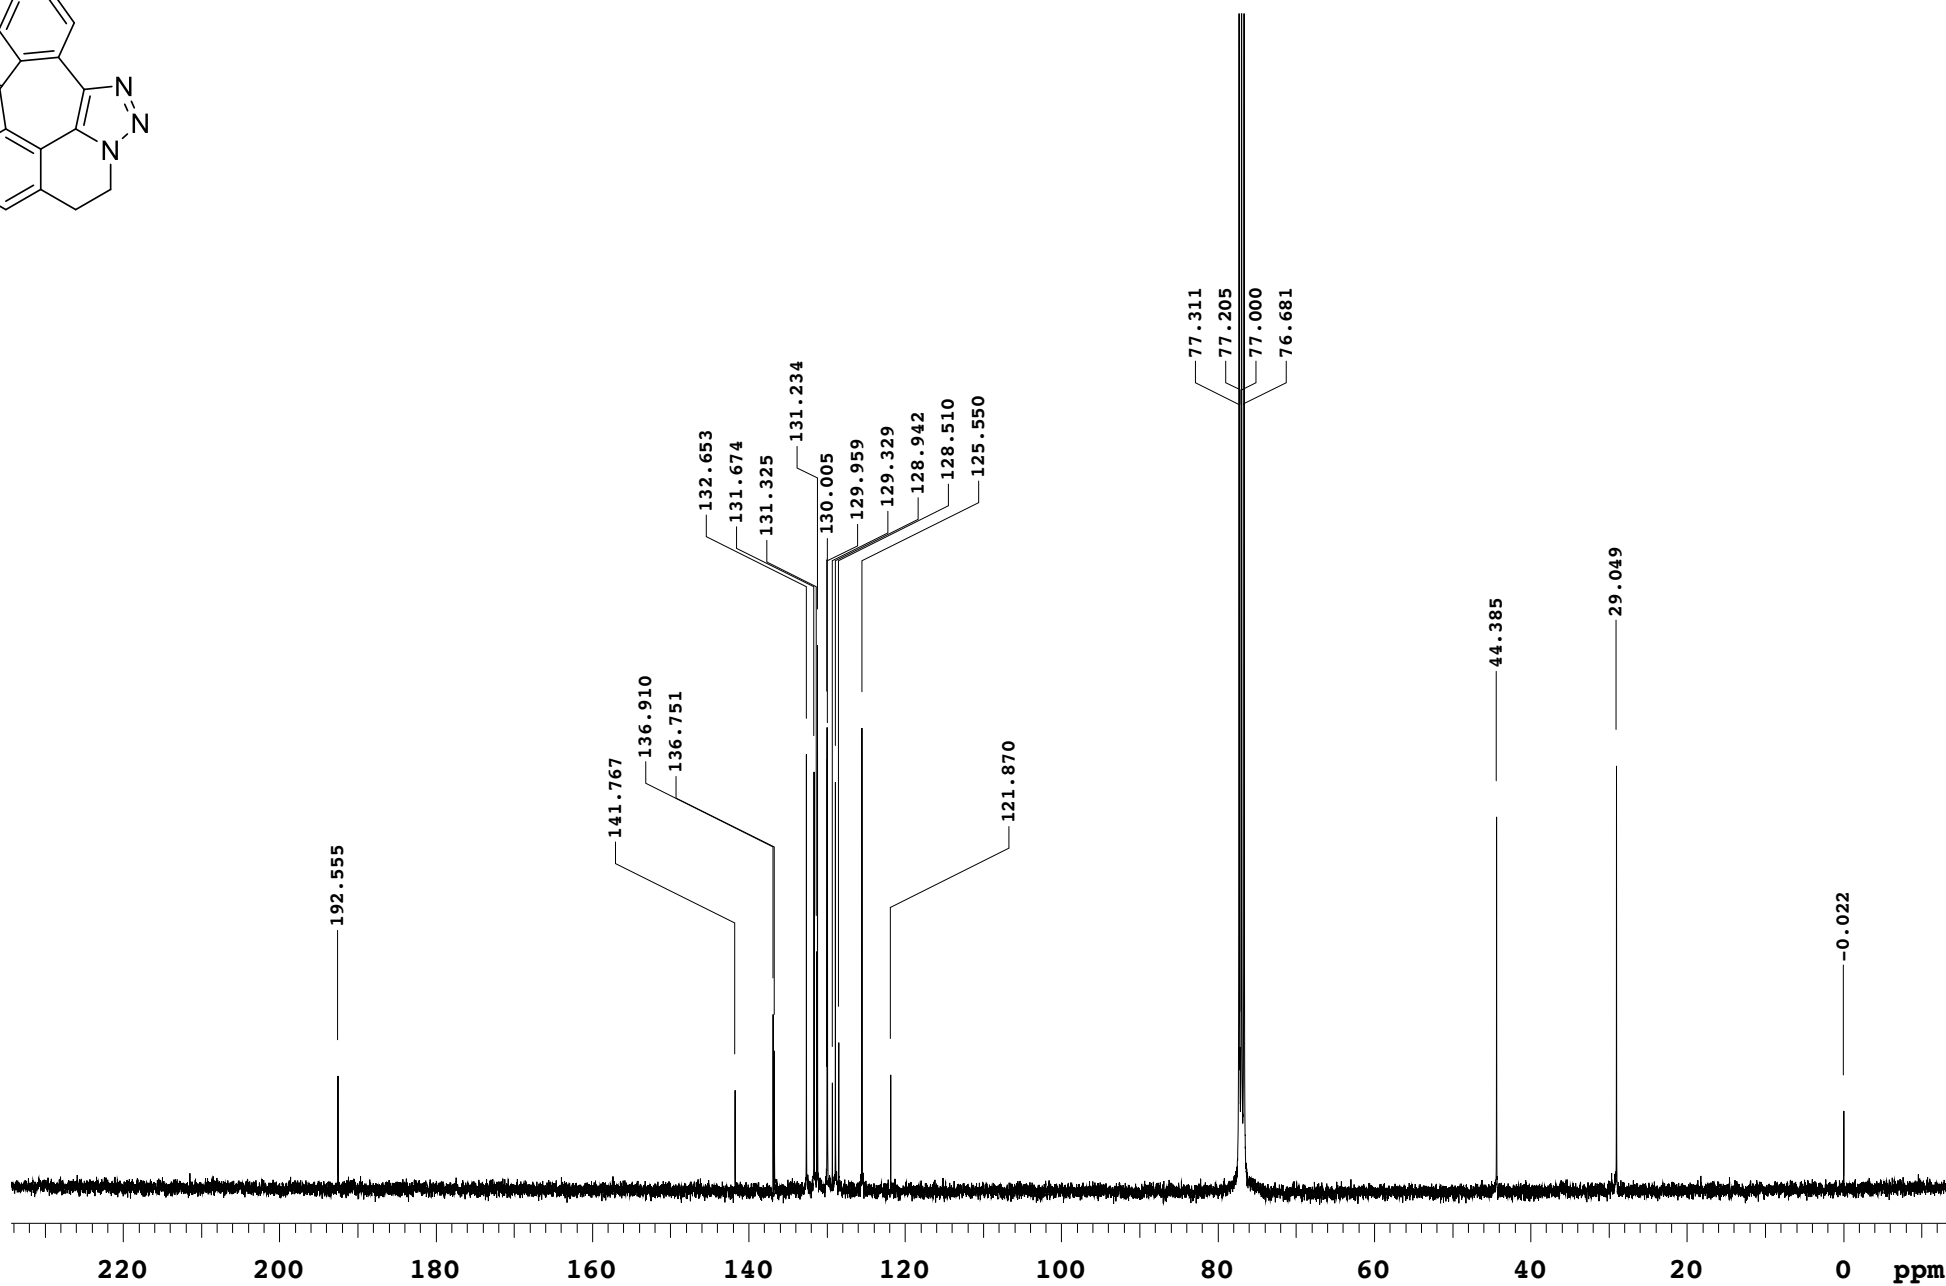

# 5,6-Dihydroindazolo[2',3':3,4][1,2,3]triazolo[5,1-a]isoquinolin-9-ium-10-ide (35).

<sup>1</sup>H NMR

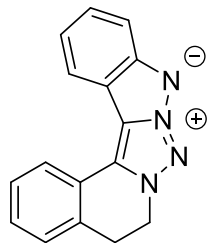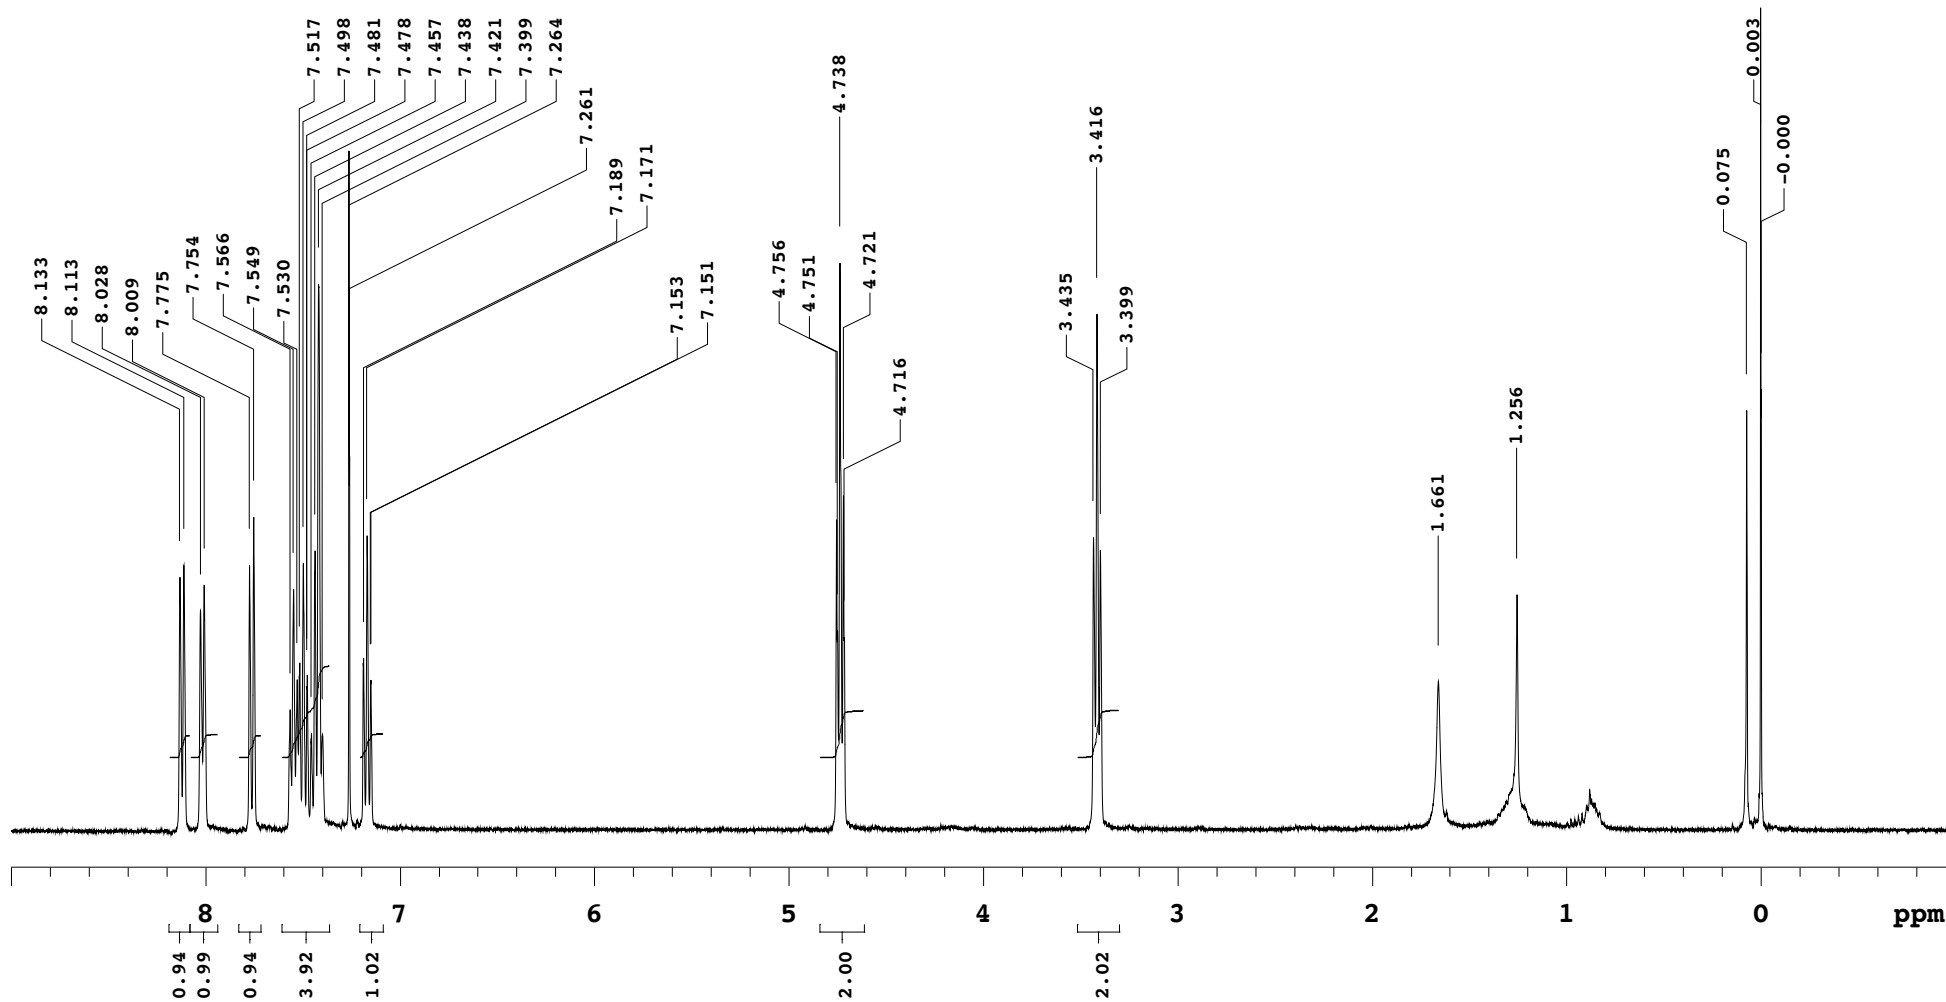

5,6-Dihydroindazolo[2',3':3,4][1,2,3]triazolo[5,1-a]isoquinolin-9-ium-10-ide (35).

<sup>13</sup>C NMR

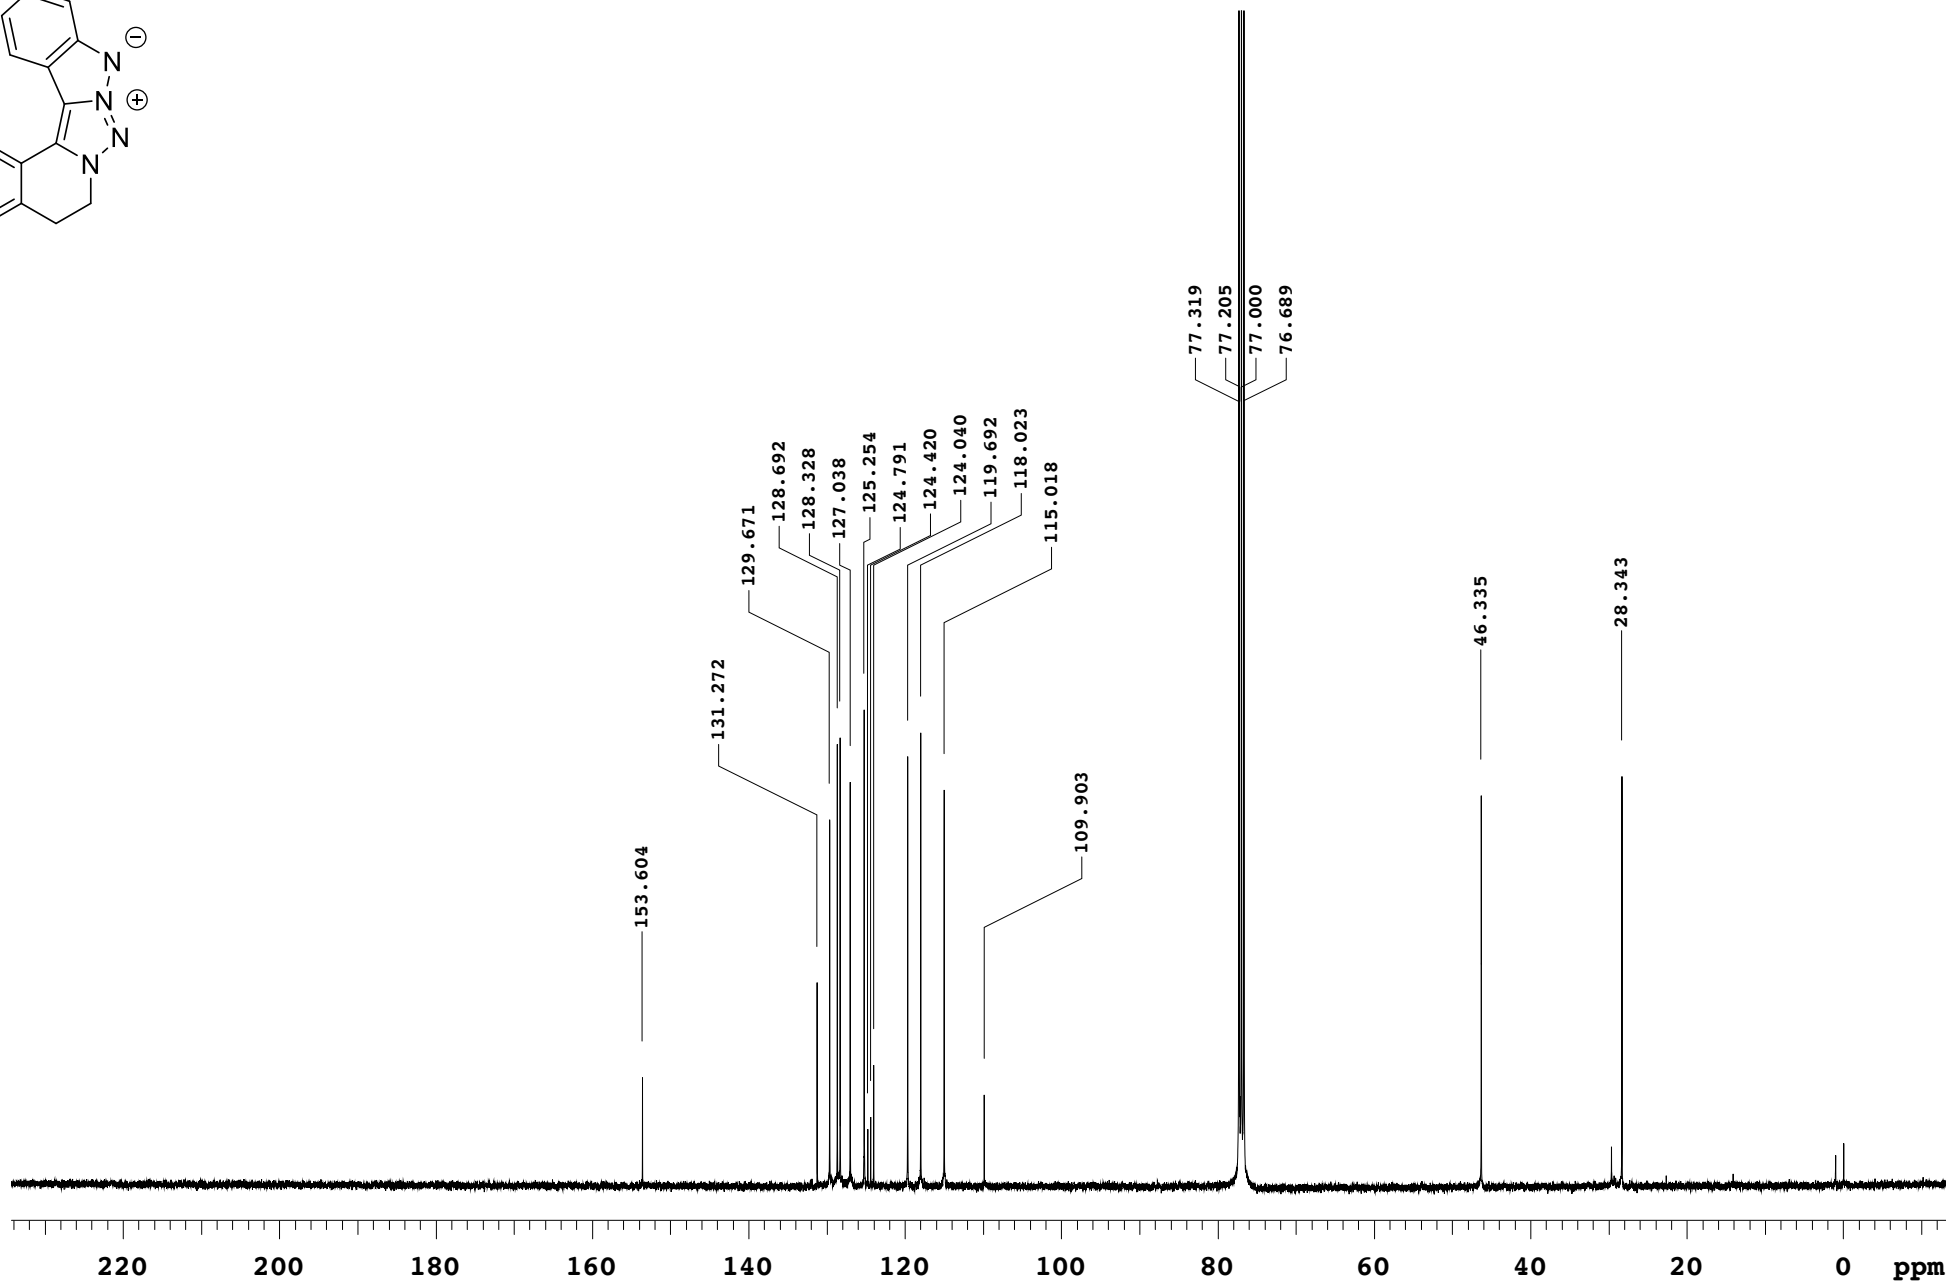

Supplement: d3ob01283b1.pdf [file d3ob01283b1.pdf]
